# Supplementary material for: Aroylhydrazone Diorganotin Complexes Causes DNA Damage and Apoptotic Cell Death: From Chemical Synthesis to Biochemical Effects
Source: MDPI journal article supplement (doi:10.3390/ijms222413525), 2021-12-16
Supplement: s1 [file s1]

# Aroylhydrazone diorganotin complexes causes DNA damage and apoptotic cell death: From chemical synthesis to biochemical effects

Wujiu Jiang <sup>1,2,\*</sup>, Yuxing Tan <sup>1,2</sup> and Yiyuan Peng <sup>1,\*</sup>

<sup>1</sup> Key Laboratory of Functional Small Organic Molecule, Ministry of Education, Key Laboratory of Green Chemistry, Jiangxi Province, College of Chemistry and Chemical Engineering, Jiangxi Normal University, Nanchang, Jiangxi 330022, PR China; jiang59@jxnu.edu.cn (W.J); tanyuxing@hynu.edu.cn (Y.T); yypeng@jxnu.edu.cn (Y.P)

<sup>2</sup> Key Laboratory of Functional Metal-Organic Compounds of Hunan Province, Key Laboratory of Functional Organometallic Materials, University of Hunan Province, Hunan Provincial Engineering Research Center for Monitoring and Treatment of Heavy Metals Pollution in the Upper Reaches of XiangJiang River, College of Chemistry and Materials Science, Hengyang Normal University, Hengyang, Hunan 421008, PR China.

## 1 Synthesis

2-(2-(4-methylbenzoyl)hydrazono)butanoic acid (**H<sub>2</sub>L**)

## 2 Crystallographic data

2.1 Crystallographic data for **1a-2b, 3b-9b**.

2.2 The selected bond length(Å) and angles(°) for **1a-2b, 3b-9b**.

2.3 The 1D structures of **2a, 2b, 4a, 5a, 8a, 9a**.

## 3 Spectra

3.1 The IR spectra of **1a-9b**.

3.2 The NMR spectra of **1a-9b**.

3.3 The HRMS spectra of **1a-9b**.

3.4 The UV-vis spectra of **1a-9b**.

## 4 TGA

## 5 Cell

## 6 Docking

## 1 Synthesis

### 2-(2-(4-methylbenzoyl)hydrazono)butanoic acid (**H<sub>2</sub>L**)

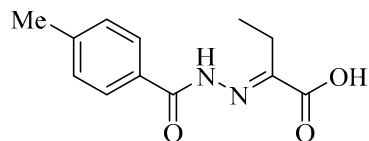

To a mixture of 2-ketobutyric acid (2.02 g, 20 mmol), sodium hydroxide (0.80 g, 20 mmol) and methanol (100 mL) were stirred in the reaction flask. When the solid is completely dissolved, 4-methylbenzohydrazide (3.00 g, 20 mmol) was added to the reaction flask. The reaction mixture were heated to reflux for 5 hrs. The end of the reaction, the solvent was removed by evaporation in vacuo, the gray solid were obtained. Dissolve all solids in distilled water (100mL), and then the solution collected by vacuum filtration. The pH of the filtrate was adjusted to 2~3 with hydrochloric acid, and vacuum dry the solid after suction filtration, 2-(2-(4-methylbenzoyl) hydrazono)butanoic acid were obtained, yield 79 %. m.p.: 135~137°C. IR (KBr,  $\text{cm}^{-1}$ ): 3233, 3209, 2974, 2937, 1695, 1685, 1668, 1661, 1652, 1636, 1613, 1595, 1570, 1528, 1496, 1474, 1465, 1457, 1450, 1319, 1295, 1274, 1252, 1190, 1161, 1148, 1122, 1088, 1055, 915, 829, 801, 774, 746, 667, 652, 636, 611, 579, 481.  $^1\text{H}$  NMR (500 MHz,  $\text{CDCl}_3$ ,  $\delta/\text{ppm}$ ): 13.85 (s, 1H), 9.21 (s, 1H), 7.77 (d,  $J = 7.8$  Hz, 3H), 7.19 (d,  $J = 7.9$  Hz, 3H), 2.60 (q,  $J = 7.4$  Hz, 2H), 2.35 (s, 3H), 1.14 (t,  $J = 7.6$  Hz, 3H).  $^{13}\text{C}$  NMR (126 MHz,  $\text{CDCl}_3$ ,  $\delta/\text{ppm}$ ): 177.79, 165.24, 143.31, 129.43, 129.38, 127.68, 127.48, 27.51, 21.52, 11.67.

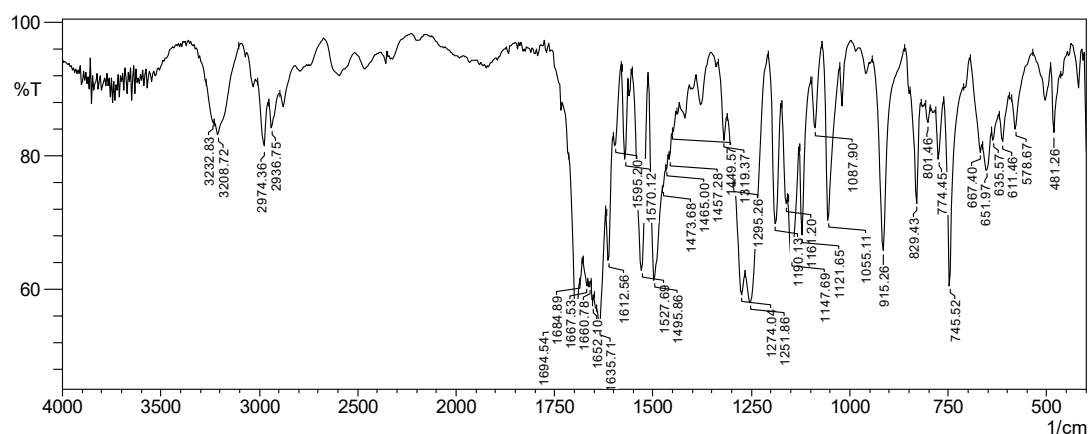

Figure S1 The IR spectra of **H<sub>2</sub>L**

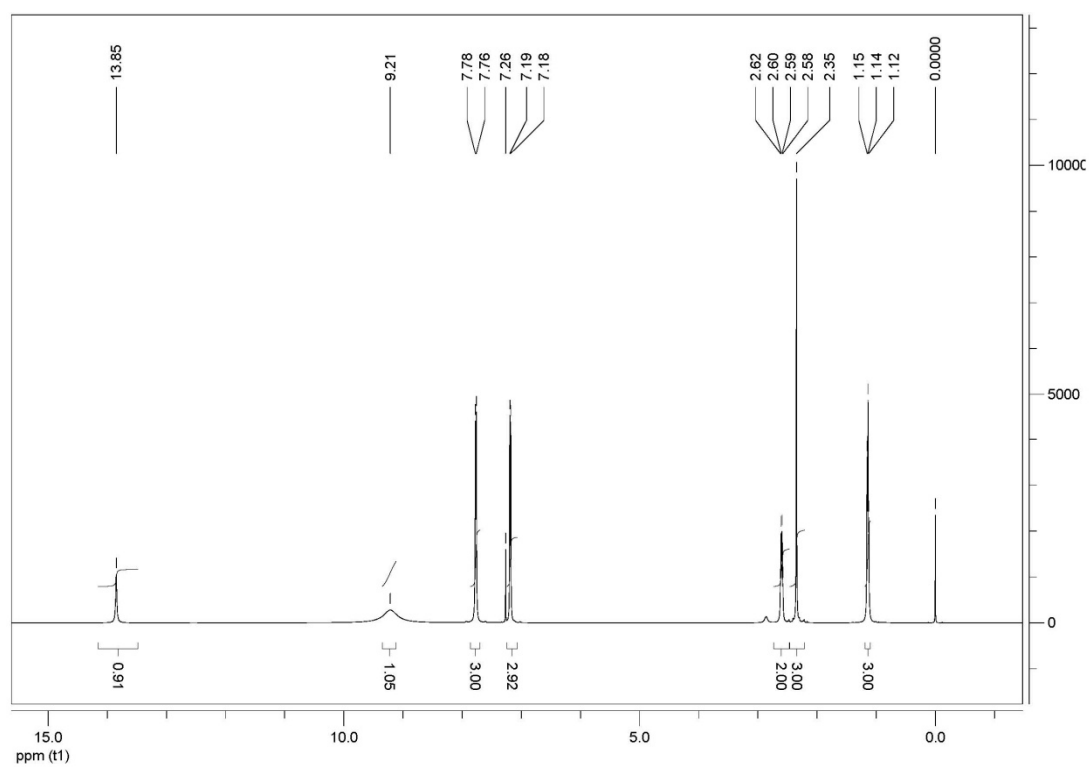

Figure S2 The <sup>1</sup>H NMR spectra of **H<sub>2</sub>L**

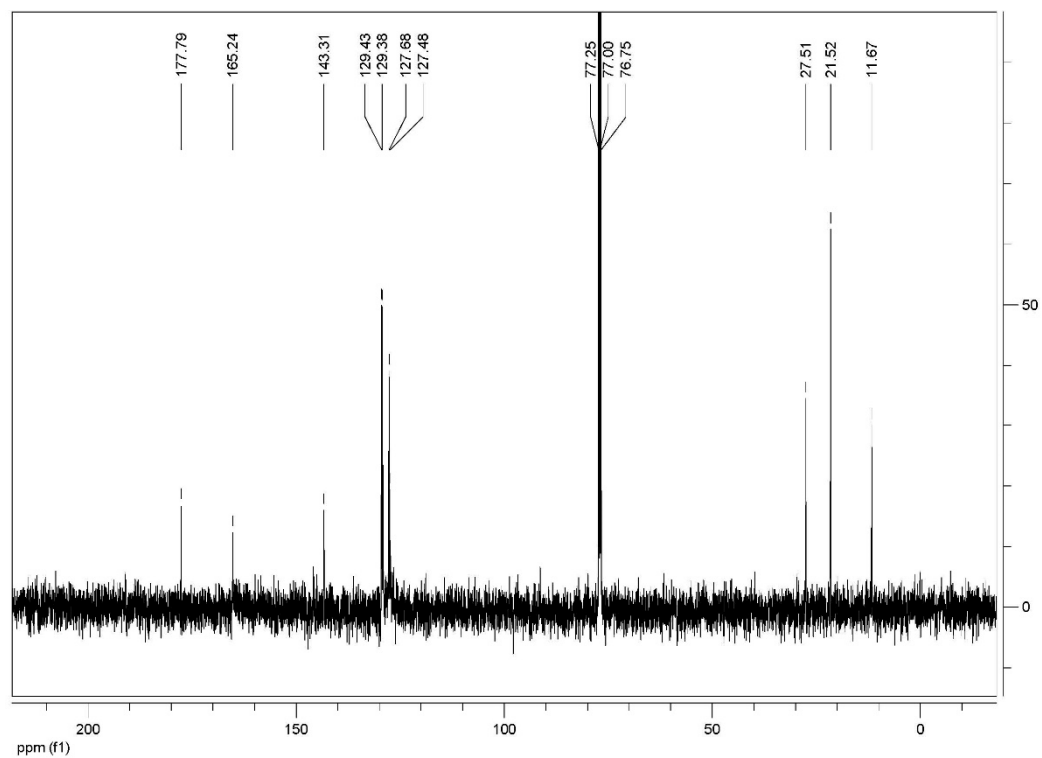

Figure S3 The <sup>13</sup>C NMR spectra of **H<sub>2</sub>L**

## 2 Crystallographic data

### 2.1 Crystallographic data for **1a-2b**, **3b-9b**.

Table S1 Crystallographic data for **1a-2b**, **3b**.

| Complexes                                 | 1a                                                               | 1b                                                               | 2a                                                               | 2b                                                               | 3b                                                               |
|-------------------------------------------|------------------------------------------------------------------|------------------------------------------------------------------|------------------------------------------------------------------|------------------------------------------------------------------|------------------------------------------------------------------|
| Empirical formula                         | C <sub>23</sub> H <sub>20</sub> N <sub>2</sub> O <sub>3</sub> Sn | C <sub>20</sub> H <sub>31</sub> N <sub>2</sub> O <sub>4</sub> Sn | C <sub>23</sub> H <sub>20</sub> N <sub>2</sub> O <sub>4</sub> Sn | C <sub>19</sub> H <sub>28</sub> N <sub>2</sub> O <sub>4</sub> Sn | C <sub>19</sub> H <sub>28</sub> N <sub>2</sub> O <sub>4</sub> Sn |
| Formula weight                            | 491.10                                                           | 482.16                                                           | 507.10                                                           | 467.12                                                           | 467.12                                                           |
| Temperature / K                           | 296(2)                                                           | 296(2)                                                           | 296(2)                                                           | 296(2)                                                           | 293(2)                                                           |
| Wavelength / Å                            | 0.71073                                                          | 0.71073                                                          | 0.71073                                                          | 0.71073                                                          | 0.71073                                                          |
| Crystal system                            | Monoclinic                                                       | Monoclinic                                                       | Monoclinic                                                       | Monoclinic                                                       | Monoclinic                                                       |
| space group                               | <i>P</i> 2 <sub>1</sub> / <i>n</i>                               | <i>P</i> 2 <sub>1</sub> / <i>c</i>                               | <i>P</i> 2 <sub>1</sub> / <i>n</i>                               | <i>C</i> 2/ <i>c</i>                                             | <i>C</i> 2/ <i>c</i>                                             |
| <i>a</i> / Å                              | 11.8100(7)                                                       | 12.8306(10)                                                      | 12.0454(9)                                                       | 23.7834(9)                                                       | 16.8486(15)                                                      |
| <i>b</i> / Å                              | 8.9659(5)                                                        | 20.4640(17)                                                      | 8.9146(7)                                                        | 8.7817(3)                                                        | 13.7348(9)                                                       |
| <i>c</i> / Å                              | 20.2830(11)                                                      | 8.8888(7)                                                        | 20.2009(15)                                                      | 23.4607(9)                                                       | 19.0796(19)                                                      |
| $\alpha$ / °                              | 90                                                               | 90                                                               | 90                                                               | 90                                                               | 90                                                               |
| $\beta$ / °                               | 99.8920(10)                                                      | 99.6540(10)                                                      | 99.2560(10)                                                      | 118.4680(10)                                                     | 92.053(8)                                                        |
| $\gamma$ / °                              | 90                                                               | 90                                                               | 90                                                               | 90                                                               | 90                                                               |
| Volume / Å <sup>3</sup>                   | 2115.8(2)                                                        | 2300.8(3)                                                        | 2140.9(3)                                                        | 4307.5(3)                                                        | 4412.4(7)                                                        |
| <i>Z</i>                                  | 4                                                                | 4                                                                | 4                                                                | 8                                                                | 8                                                                |
| <i>D</i> <sub>c</sub> / Mg/m <sup>3</sup> | 1.542                                                            | 1.392                                                            | 1.573                                                            | 1.441                                                            | 1.406                                                            |
| Absorption coefficient / mm <sup>-1</sup> | 1.233                                                            | 1.135                                                            | 1.225                                                            | 1.210                                                            | 1.181                                                            |
| <i>F</i> (000)                            | 984                                                              | 988                                                              | 1016                                                             | 1904                                                             | 1904                                                             |
| Crystal size / mm                         | 0.23×0.21×0.17                                                   | 0.33×0.29×0.24                                                   | 0.27×0.24×0.13                                                   | 0.21×0.19×0.18                                                   | 0.20×0.20×0.19                                                   |
| $\theta$ range / (°)                      | 1.868 ~ 27.595                                                   | 2.53 ~ 25.10                                                     | 2.13 ~ 25.10                                                     | 3.37 ~ 25.10                                                     | 2.84 ~ 25.10                                                     |
| Limiting indices                          | -15≤ <i>h</i> ≤14,<br>-10≤ <i>k</i> ≤11,<br>-26≤ <i>l</i> ≤20    | -15≤ <i>h</i> ≤15,<br>-24≤ <i>k</i> ≤23,<br>-10≤ <i>l</i> ≤10    | -14≤ <i>h</i> ≤14,<br>0≤ <i>k</i> ≤10,<br>0≤ <i>l</i> ≤24        | -28≤ <i>h</i> ≤28,<br>-10≤ <i>k</i> ≤10,<br>-28≤ <i>l</i> ≤27    | -20≤ <i>h</i> ≤18,<br>-16≤ <i>k</i> ≤16,<br>-16≤ <i>l</i> ≤22    |
| Reflections collected / unique            | 12485 / 4838<br>[ <i>R</i> <sub>int</sub> = 0.0156]              | 23777 / 4088<br>[ <i>R</i> <sub>int</sub> = 0.0225]              | 3807 / 3807<br>[ <i>R</i> <sub>int</sub> = 0.0271]               | 27454 / 3829<br>[ <i>R</i> <sub>int</sub> = 0.0751]              | 11294 / 3912<br>[ <i>R</i> <sub>int</sub> = 0.0329]              |

|                                                                    |                                     |                                     |                                     |                                     |                                     |
|--------------------------------------------------------------------|-------------------------------------|-------------------------------------|-------------------------------------|-------------------------------------|-------------------------------------|
| Completeness                                                       | 99.8 %                              | 99.8 %                              | 99.9 %                              | 99.8 %                              | 99.9 %                              |
| Max. and min. transmission                                         | 0.7646 and 0.8177                   | 0.7723 and 0.7058                   | 0.8570 and 0.7333                   | 0.8116 and 0.7852                   | 0.8067 and 0.7980                   |
| Data / restraints / parameters                                     | 4838 / 0 / 264                      | 4088 / 28 / 251                     | 3807 / 0 / 273                      | 3829 / 1 / 248                      | 3912 / 1 / 239                      |
| Goodness-of-fit on $F^2$                                           | 1.102                               | 1.073                               | 1.185                               | 1.062                               | 1.023                               |
| Final $R$ indices [ $I > 2\sigma(I)$ ]                             | $R_1 = 0.0185$ ,<br>$wR_2 = 0.0458$ | $R_1 = 0.0431$ ,<br>$wR_2 = 0.1131$ | $R_1 = 0.0448$ ,<br>$wR_2 = 0.0985$ | $R_1 = 0.0370$ ,<br>$wR_2 = 0.0927$ | $R_1 = 0.0372$ ,<br>$wR_2 = 0.0857$ |
| $R$ indices (all data)                                             | $R_1 = 0.0210$ ,<br>$wR_2 = 0.0472$ | $R_1 = 0.0496$ ,<br>$wR_2 = 0.1168$ | $R_1 = 0.0507$ ,<br>$wR_2 = 0.1008$ | $R_1 = 0.0451$ ,<br>$wR_2 = 0.0961$ | $R_1 = 0.0629$ ,<br>$wR_2 = 0.0954$ |
| $\Delta\rho_{\max}$ and $\Delta\rho_{\min}$ / (e·Å <sup>-3</sup> ) | 0.371 and -0.424                    | 1.181 and -0.493                    | 0.894 and -1.062                    | 0.869 and -0.701                    | 0.599 and -0.335                    |

Table S2 Crystallographic data for **4a-5b**.

| Complexes                                 | 4a                                                               | 4b                                                               | 5a                                                               | 5b                                                               |
|-------------------------------------------|------------------------------------------------------------------|------------------------------------------------------------------|------------------------------------------------------------------|------------------------------------------------------------------|
| Empirical formula                         | C <sub>24</sub> H <sub>22</sub> N <sub>2</sub> O <sub>3</sub> Sn | C <sub>21</sub> H <sub>34</sub> N <sub>2</sub> O <sub>4</sub> Sn | C <sub>24</sub> H <sub>22</sub> N <sub>2</sub> O <sub>4</sub> Sn | C <sub>21</sub> H <sub>34</sub> N <sub>2</sub> O <sub>5</sub> Sn |
| Formula weight                            | 505.13                                                           | 497.19                                                           | 521.13                                                           | 513.19                                                           |
| Temperature / K                           | 296(2)                                                           | 296(2)                                                           | 296(2)                                                           | 296(2)                                                           |
| Wavelength / Å                            | 0.71073                                                          | 0.71073                                                          | 0.71073                                                          | 0.71073                                                          |
| Crystal system                            | Monoclinic                                                       | Triclinic                                                        | Orthorhombic                                                     | Triclinic                                                        |
| space group                               | $P2_1/n$                                                         | $P-1$                                                            | $P2_12_12_1$                                                     | $P-1$                                                            |
| $a$ / Å                                   | 13.093(3)                                                        | 9.939(4)                                                         | 8.950(4)                                                         | 9.7696(8)                                                        |
| $b$ / Å                                   | 8.9534(17)                                                       | 11.174(5)                                                        | 13.753(7)                                                        | 10.9742(9)                                                       |
| $c$ / Å                                   | 19.338(4)                                                        | 11.607(5)                                                        | 18.650(9)                                                        | 11.6713(9)                                                       |
| $\alpha$ / °                              | 90                                                               | 75.776(5)                                                        | 90                                                               | 74.4910(10)                                                      |
| $\beta$ / °                               | 100.208(3)                                                       | 84.118(5)                                                        | 90                                                               | 86.0210(10)                                                      |
| $\gamma$ / °                              | 90                                                               | 76.716(5)                                                        | 90                                                               | 86.6250(10)                                                      |
| Volume / Å <sup>3</sup>                   | 2231.0(7)                                                        | 1214.7(9)                                                        | 2296(2)                                                          | 1201.79(17)                                                      |
| $Z$                                       | 4                                                                | 2                                                                | 4                                                                | 2                                                                |
| $D_c$ / Mg/m <sup>3</sup>                 | 1.504                                                            | 1.359                                                            | 1.508                                                            | 1.418                                                            |
| Absorption coefficient / mm <sup>-1</sup> | 1.172                                                            | 1.077                                                            | 1.145                                                            | 1.094                                                            |
| $F(000)$                                  | 1016                                                             | 512                                                              | 1048                                                             | 528                                                              |
| Crystal size / mm                         | 0.23×0.23×0.22                                                   | 0.23×0.23×0.21                                                   | 0.24×0.24×0.22                                                   | 0.24×0.22×0.20                                                   |

|                                                                                |                               |                               |                               |                               |
|--------------------------------------------------------------------------------|-------------------------------|-------------------------------|-------------------------------|-------------------------------|
| $\theta$ range / (°)                                                           | 1.74 ~ 25.10                  | 2.32 ~ 25.10                  | 1.84 ~ 25.10                  | 2.69 ~ 25.10                  |
|                                                                                | -15 $\leq h \leq$ 15,         | -11 $\leq h \leq$ 11,         | -10 $\leq h \leq$ 10,         | -11 $\leq h \leq$ 11,         |
| Limiting indices                                                               | -10 $\leq k \leq$ 10,         | -13 $\leq k \leq$ 13,         | -12 $\leq k \leq$ 16,         | -13 $\leq k \leq$ 13,         |
|                                                                                | -19 $\leq l \leq$ 23          | -13 $\leq l \leq$ 13          | -22 $\leq l \leq$ 22          | -13 $\leq l \leq$ 13          |
| Reflections                                                                    | 10965 / 3966                  | 12454 / 4318                  | 11548 / 4070                  | 12388 / 4264                  |
| collected / unique                                                             | [ $R_{\text{int}} = 0.0164$ ] | [ $R_{\text{int}} = 0.0230$ ] | [ $R_{\text{int}} = 0.0179$ ] | [ $R_{\text{int}} = 0.0171$ ] |
| Completeness                                                                   | 99.8 %                        | 99.6 %                        | 100.0 %                       | 99.6 %                        |
| Max. and min. transmission                                                     | 0.7826 and 0.7743             | 0.8054 and 0.7897             | 0.7868 and 0.7707             | 0.8109 and 0.7792             |
| Data / restraints / parameters                                                 | 3966 / 0 / 273                | 4318 / 9 / 262                | 4070 / 0 / 282                | 4264 / 1 / 271                |
| Goodness-of-fit on $F^2$                                                       | 1.113                         | 1.070                         | 1.148                         | 1.063                         |
| Final $R$ indices                                                              | $R_1 = 0.0190$ ,              | $R_1 = 0.0351$ ,              | $R_1 = 0.0167$ ,              | $R_1 = 0.0246$ ,              |
| [ $I > 2\sigma(I)$ ]                                                           | $wR_2 = 0.0481$               | $wR_2 = 0.1018$               | $wR_2 = 0.0408$               | $wR_2 = 0.0665$               |
| $R$ indices (all data)                                                         | $R_1 = 0.0215$ ,              | $R_1 = 0.0402$ ,              | $R_1 = 0.0169$ ,              | $R_1 = 0.0267$ ,              |
|                                                                                | $wR_2 = 0.0492$               | $wR_2 = 0.1060$               | $wR_2 = 0.0409$               | $wR_2 = 0.0681$               |
| $\Delta\rho_{\text{max}}$ and $\Delta\rho_{\text{min}}$ / (e·Å <sup>-3</sup> ) | 0.242 and -0.560              | 0.816 and -0.510              | 0.679 and -0.607              | 0.601 and -0.416              |

Table S3 Crystallographic data for **6a-7b**.

| Complexes                 | <b>6a</b>                                                        | <b>6b</b>                                                        | <b>7a</b>                                                                      | <b>7b</b>                                                                      |
|---------------------------|------------------------------------------------------------------|------------------------------------------------------------------|--------------------------------------------------------------------------------|--------------------------------------------------------------------------------|
| Empirical formula         | C <sub>27</sub> H <sub>28</sub> N <sub>2</sub> O <sub>3</sub> Sn | C <sub>24</sub> H <sub>40</sub> N <sub>2</sub> O <sub>4</sub> Sn | C <sub>48</sub> H <sub>46</sub> N <sub>6</sub> O <sub>12</sub> Sn <sub>2</sub> | C <sub>40</sub> H <sub>62</sub> N <sub>6</sub> O <sub>12</sub> Sn <sub>2</sub> |
| Formula weight            | 547.20                                                           | 539.27                                                           | 1136.29                                                                        | 1056.34                                                                        |
| Temperature / K           | 293(2)                                                           | 296(2)                                                           | 296(2)                                                                         | 296(2)                                                                         |
| Wavelength / Å            | 0.71073                                                          | 0.71073                                                          | 0.71073                                                                        | 0.71073                                                                        |
| Crystal system            | Triclinic                                                        | Triclinic                                                        | Monoclinic                                                                     | Tetragonal                                                                     |
| space group               | $P-1$                                                            | $P-1$                                                            | $P2_1/c$                                                                       | $I4_1/a$                                                                       |
| $a$ / Å                   | 10.242(4)                                                        | 10.637(3)                                                        | 12.375(6)                                                                      | 25.542(10)                                                                     |
| $b$ / Å                   | 11.021(4)                                                        | 12.087(3)                                                        | 11.479(6)                                                                      | 25.542(10)                                                                     |
| $c$ / Å                   | 12.065(4)                                                        | 12.177(3)                                                        | 16.659(8)                                                                      | 15.019(7)                                                                      |
| $\alpha$ / °              | 104.799(4)                                                       | 100.935(3)                                                       | 90                                                                             | 90                                                                             |
| $\beta$ / °               | 102.901(4)                                                       | 108.490(3)                                                       | 100.266(7)                                                                     | 90                                                                             |
| $\gamma$ / °              | 92.927(4)                                                        | 104.481(3)                                                       | 90                                                                             | 90                                                                             |
| Volume / Å <sup>3</sup>   | 1275.0(8)                                                        | 1374.5(6)                                                        | 2328(2)                                                                        | 9798(7)                                                                        |
| $Z$                       | 2                                                                | 2                                                                | 2                                                                              | 8                                                                              |
| $D_c$ / Mg/m <sup>3</sup> | 1.425                                                            | 1.303                                                            | 1.621                                                                          | 1.432                                                                          |
| Absorption                | 1.031                                                            | 0.957                                                            | 1.143                                                                          | 1.080                                                                          |

|                                                                |                                     |                                     |                                     |                                     |
|----------------------------------------------------------------|-------------------------------------|-------------------------------------|-------------------------------------|-------------------------------------|
| coefficient / mm <sup>-1</sup>                                 |                                     |                                     |                                     |                                     |
| <i>F</i> (000)                                                 | 556                                 | 520                                 | 1144                                | 4320                                |
| Crystal size / mm                                              | 0.22×0.22×0.21                      | 0.21×0.21×0.20                      | 0.22×0.20×0.20                      | 0.23×0.22×0.22                      |
| $\theta$ range / (°)                                           | 2.65 ~ 25.10                        | 2.76 ~ 25.10                        | 1.67 ~ 25.10                        | 2.75 ~ 25.10                        |
| Limiting indices                                               | -12≤ <i>h</i> ≤12,                  | -12≤ <i>h</i> ≤12,                  | -14≤ <i>h</i> ≤14,                  | -30≤ <i>h</i> ≤30,                  |
|                                                                | -13≤ <i>k</i> ≤13,                  | -14≤ <i>k</i> ≤14,                  | -11≤ <i>k</i> ≤13,                  | -30≤ <i>k</i> ≤30,                  |
|                                                                | -14≤ <i>l</i> ≤14                   | -14≤ <i>l</i> ≤14                   | -19≤ <i>l</i> ≤11                   | -17≤ <i>l</i> ≤17                   |
| Reflections                                                    | 13133 / 4530                        | 14057 / 4865                        | 9472 / 4126                         | 49687 / 436                         |
| collected / unique                                             | [ <i>R</i> <sub>int</sub> = 0.0146] | [ <i>R</i> <sub>int</sub> = 0.0206] | [ <i>R</i> <sub>int</sub> = 0.0189] | [ <i>R</i> <sub>int</sub> = 0.0279] |
| Completeness                                                   | 99.6 %                              | 99.4 %                              | 99.5 %                              | 99.9 %                              |
| Max. and min. transmission                                     | 0.8125 and 0.8049                   | 0.8316 and 0.8242                   | 0.8036 and 0.7871                   | 0.7971 and 0.7893                   |
| Data / restraints / parameters                                 | 4530 / 0 / 302                      | 4865 / 162 / 372                    | 4126 / 7 / 313                      | 4361 / 26 / 279                     |
| Goodness-of-fit on <i>F</i> <sup>2</sup>                       | 1.057                               | 1.071                               | 1.039                               | 1.058                               |
| Final <i>R</i> indices                                         | <i>R</i> <sub>1</sub> = 0.0206,     | <i>R</i> <sub>1</sub> = 0.0378,     | <i>R</i> <sub>1</sub> = 0.0245,     | <i>R</i> <sub>1</sub> = 0.0437,     |
| [ <i>I</i> > 2δ( <i>I</i> )]                                   | <i>wR</i> <sub>2</sub> = 0.0554     | <i>wR</i> <sub>2</sub> = 0.1099     | <i>wR</i> <sub>2</sub> = 0.0618     | <i>wR</i> <sub>2</sub> = 0.1325     |
| <i>R</i> indices (all data)                                    | <i>R</i> <sub>1</sub> = 0.0218,     | <i>R</i> <sub>1</sub> = 0.0459,     | <i>R</i> <sub>1</sub> = 0.0295,     | <i>R</i> <sub>1</sub> = 0.0523,     |
|                                                                | <i>wR</i> <sub>2</sub> = 0.0564     | <i>wR</i> <sub>2</sub> = 0.1177     | <i>wR</i> <sub>2</sub> = 0.0641     | <i>wR</i> <sub>2</sub> = 0.1400     |
| Δρ <sub>max</sub> and Δρ <sub>min</sub> / (e·Å <sup>-3</sup> ) | 0.596 and -0.241                    | 0.639 and -0.426                    | 0.422 and -0.645                    | 1.235 and -0.993                    |

Table S4 Crystallographic data for **8a-9b**.

| Complexes               | <b>8a</b>                                                        | <b>8b</b>                                                        | <b>9a</b>                                                         | <b>9b</b>                                                         |
|-------------------------|------------------------------------------------------------------|------------------------------------------------------------------|-------------------------------------------------------------------|-------------------------------------------------------------------|
| Empirical formula       | C <sub>21</sub> H <sub>18</sub> N <sub>2</sub> O <sub>4</sub> Sn | C <sub>18</sub> H <sub>30</sub> N <sub>2</sub> O <sub>5</sub> Sn | C <sub>21</sub> H <sub>18</sub> N <sub>2</sub> O <sub>3</sub> SSn | C <sub>18</sub> H <sub>30</sub> N <sub>2</sub> O <sub>4</sub> SSn |
| Formula weight          | 481.06                                                           | 473.13                                                           | 497.12                                                            | 489.19                                                            |
| Temperature / K         | 293(2)                                                           | 296(2)                                                           | 296(2)                                                            | 296(2)                                                            |
| Wavelength / Å          | 0.71073                                                          | 0.71073                                                          | 0.71073                                                           | 0.71073                                                           |
| Crystal system          | Monoclinic                                                       | Monoclinic                                                       | Monoclinic                                                        | Monoclinic                                                        |
| space group             | <i>P</i> 2 <sub>1</sub> / <i>c</i>                               | <i>P</i> 2 <sub>1</sub> / <i>c</i>                               | <i>P</i> 2 <sub>1</sub> / <i>c</i>                                | <i>P</i> 2 <sub>1</sub> / <i>c</i>                                |
| <i>a</i> / Å            | 10.777(4)                                                        | 11.6256(6)                                                       | 11.5889(14)                                                       | 12.4982(8)                                                        |
| <i>b</i> / Å            | 9.044(3)                                                         | 24.3106(13)                                                      | 8.9899(10)                                                        | 20.7695(14)                                                       |
| <i>c</i> / Å            | 20.784(7)                                                        | 16.0727(8)                                                       | 20.490(2)                                                         | 8.7242(6)                                                         |
| α / °                   | 90                                                               | 90                                                               | 90                                                                | 90                                                                |
| β / °                   | 99.399(5)                                                        | 107.8840(10)                                                     | 100.885(2)                                                        | 101.5360(10)                                                      |
| γ / °                   | 90                                                               | 90                                                               | 90                                                                | 90                                                                |
| Volume / Å <sup>3</sup> | 1998.6(12)                                                       | 4323.1(4)                                                        | 2096.3(4)                                                         | 2218.9(3)                                                         |

|                                                                                   |                                               |                                                |                                                |                                                |
|-----------------------------------------------------------------------------------|-----------------------------------------------|------------------------------------------------|------------------------------------------------|------------------------------------------------|
| Z                                                                                 | 4                                             | 8                                              | 4                                              | 4                                              |
| $D_c$ / Mg/m <sup>3</sup>                                                         | 1.599                                         | 1.454                                          | 1.575                                          | 1.464                                          |
| Absorption<br>coefficient / mm <sup>-1</sup>                                      | 1.307                                         | 1.210                                          | 1.342                                          | 1.269                                          |
| $F(000)$                                                                          | 960                                           | 1936                                           | 992                                            | 1000                                           |
| Crystal size / mm                                                                 | 0.22×0.22×0.20                                | 0.23×0.22×0.22                                 | 0.22×0.20×0.18                                 | 0.23×0.23×0.22                                 |
| $\theta$ range / (°)                                                              | 2.30 ~ 25.10                                  | 1.57 ~ 25.10                                   | 1.88 ~ 25.10                                   | 1.93 ~ 25.10                                   |
| Limiting indices                                                                  | -8≤ $h$ ≤12,<br>-10≤ $k$ ≤10,<br>-22≤ $l$ ≤24 | -10≤ $h$ ≤13,<br>-29≤ $k$ ≤28,<br>-19≤ $l$ ≤18 | -13≤ $h$ ≤13,<br>-10≤ $k$ ≤10,<br>-19≤ $l$ ≤24 | -11≤ $h$ ≤14,<br>-24≤ $k$ ≤23,<br>-10≤ $l$ ≤10 |
| Reflections collected                                                             | 8097 / 3533                                   | 21936 / 7701                                   | 10354 / 3727                                   | 11003 / 3939                                   |
| / unique                                                                          | [ $R_{\text{int}} = 0.0110$ ]                 | [ $R_{\text{int}} = 0.0194$ ]                  | [ $R_{\text{int}} = 0.0140$ ]                  | [ $R_{\text{int}} = 0.0195$ ]                  |
| Completeness                                                                      | 99.4 %                                        | 100 %                                          | 99.7 %                                         | 99.7 %                                         |
| Max. and min.<br>transmission                                                     | 0.7800 and<br>0.7619                          | 0.7767 and<br>0.7683                           | 0.7942 and<br>0.7568                           | 0.7677 and<br>0.7591                           |
| Data / restraints /<br>parameters                                                 | 3533 / 10 / 294                               | 7701 / 40 / 485                                | 3727 / 40 / 255                                | 3939 / 7 / 273                                 |
| Goodness-of-fit on<br>$F^2$                                                       | 1.075                                         | 1.044                                          | 1.106                                          | 1.122                                          |
| Final $R$ indices<br>[ $I > 2\sigma(I)$ ]                                         | $R_1 = 0.0222$ ,<br>$wR_2 = 0.0487$           | $R_1 = 0.0266$ ,<br>$wR_2 = 0.0622$            | $R_1 = 0.0285$ ,<br>$wR_2 = 0.0687$            | $R_1 = 0.0307$ ,<br>$wR_2 = 0.0748$            |
| $R$ indices (all data)                                                            | $R_1 = 0.0276$ ,<br>$wR_2 = 0.0507$           | $R_1 = 0.0353$ ,<br>$wR_2 = 0.0652$            | $R_1 = 0.0331$ ,<br>$wR_2 = 0.0705$            | $R_1 = 0.0361$ ,<br>$wR_2 = 0.0774$            |
| $\Delta\rho_{\text{max}}$ and $\Delta\rho_{\text{min}}$ /<br>(e·Å <sup>-3</sup> ) | 0.246 and -<br>0.318                          | 0.424 and -<br>0.325                           | 0.760 and -<br>0.651                           | 0.423 and -<br>0.459                           |

## 2.2 The selected bond length(Å) and angles(°) for **1a-2b**, **3b-9b**.

Table S5 The selected bond length(Å) and angles(°) for **1a-2b**, **3b-9b**.

| <b>1a</b>                                |            |            |            |                         |            |
|------------------------------------------|------------|------------|------------|-------------------------|------------|
| Sn1-C12                                  | 2.1171(17) | Sn1-C18    | 2.1181(17) | Sn1-N2                  | 2.2275(13) |
| Sn1-O2                                   | 2.1678(11) | Sn1-O1     | 2.2570(11) | Sn1-O3 <sup>i</sup>     | 2.4020(12) |
| C12-Sn1-C18                              | 153.86(7)  | O2-Sn1-N2  | 72.33(4)   | C12-Sn1-O3 <sup>i</sup> | 84.69(5)   |
| C12-Sn1-O2                               | 101.42(6)  | C12-Sn1-O1 | 88.90(6)   | C18-Sn1-O3 <sup>i</sup> | 48(5)      |
| C18-Sn1-O2                               | 97.05(6)   | C18-Sn1-O1 | 88.33(6)   | O2-Sn1-O3 <sup>i</sup>  | 72.31(4)   |
| C12-Sn1-N2                               | 97.38(6)   | O2-Sn1-O1  | 140.88(4)  | N2-Sn1-O3 <sup>i</sup>  | 144.27(4)  |
| C18-Sn1-N2                               | 105.81(5)  | N2-Sn1-O1  | 68.94(4)   | O1-Sn1-O3 <sup>i</sup>  | 146.72(4)  |
| Symmetry codes: i: -x+3/2, y-1/2, -z+1/2 |            |            |            |                         |            |
| <b>1b</b>                                |            |            |            |                         |            |
| Sn1-C16                                  | 2.106(5)   | Sn1-O1     | 2.171(3)   | Sn1-O2                  | 2.287(3)   |



|                        |            |                         |            |                         |            |
|------------------------|------------|-------------------------|------------|-------------------------|------------|
| Sn1-C12                | 2.114(5)   | Sn1-N2                  | 2.244(4)   | Sn1-O4                  | 2.501(4)   |
| Sn1-O2 <sup>i</sup>    | 2.8097(2)  |                         |            |                         |            |
| C16-Sn1-C12            | 158.8(2)   | O1-Sn1-N2               | 69.96(13)  | C16-Sn1-O4              | 84.26(19)  |
| C16-Sn1-O1             | 95.85(18)  | C16-Sn1-O2              | 92.19(17)  | C12-Sn1-O4              | 79.97(19)  |
| C12-Sn1-O1             | 94.4(2)    | C12-Sn1-O2              | 91.69(19)  | O1-Sn1-O4               | 77.58(14)  |
| C16-Sn1-N2             | 101.43(17) | O1-Sn1-O2               | 140.11(12) | N2-Sn1-O4               | 147.42(14) |
| C12-Sn1-N2             | 99.46(17)  | N2-Sn1-O2               | 70.15(12)  | O2-Sn1-O4               | 142.21(13) |
| O2-Sn1-O2 <sup>i</sup> | 67.151(2)  | N2-Sn1-O2 <sup>i</sup>  | 137.286(3) | O1-Sn1-O2 <sup>i</sup>  | 152.708(3) |
| O4-Sn1-O2 <sup>i</sup> | 75.124(2)  | C12-Sn1-O2 <sup>i</sup> | 80.896(2)  | C16-Sn1-O2 <sup>i</sup> | 81.480(2)  |

Symmetry codes: i: -x, -y+1, -z+1

| 2a          |            |            |            |                         |            |
|-------------|------------|------------|------------|-------------------------|------------|
| Sn1-C12     | 2.109(6)   | Sn1-O2     | 2.169(3)   | Sn1-O1                  | 2.282(3)   |
| Sn1-C18     | 2.119(5)   | Sn1-N2     | 2.238(4)   | Sn1-O3 <sup>i</sup>     | 2.387(3)   |
| C12-Sn1-C18 | 155.5(2)   | O2-Sn1-N2  | 71.91(13)  | C12-Sn1-O3 <sup>i</sup> | 85.12(17)  |
| C12-Sn1-O2  | 100.41(18) | C12-Sn1-O1 | 88.79(18)  | C18-Sn1-O3 <sup>i</sup> | 84.23(16)  |
| C18-Sn1-O2  | 97.31(18)  | C18-Sn1-O1 | 88.23(17)  | O2-Sn1-O3 <sup>i</sup>  | 72.42(12)  |
| C12-Sn1-N2  | 96.76(18)  | O2-Sn1-O1  | 140.49(12) | N2-Sn1-O3 <sup>i</sup>  | 144.02(13) |
| C18-Sn1-N2  | 104.80(18) | N2-Sn1-O1  | 68.87(13)  | O1-Sn1-O3 <sup>i</sup>  | 147.04(12) |

Symmetry codes: i: -x+1/2, y+1/2, -z+1/2

| 2b          |            |            |           |                         |           |
|-------------|------------|------------|-----------|-------------------------|-----------|
| Sn1-C12     | 2.104(4)   | Sn1-O2     | 2.155(2)  | Sn1-O1                  | 2.294(2)  |
| Sn1-C16     | 2.116(4)   | Sn1-N1     | 2.243(3)  | Sn1-O3 <sup>i</sup>     | 2.464(2)  |
| C12-Sn1-C16 | 147.3(2)   | O2-Sn1-N1  | 71.88(8)  | C12-Sn1-O3 <sup>i</sup> | 86.63(12) |
| C12-Sn1-O2  | 104.17(14) | C12-Sn1-O1 | 83.95(12) | C16-Sn1-O3 <sup>i</sup> | 83.58(14) |
| C16-Sn1-O2  | 101.96(17) | C16-Sn1-O1 | 88.58(16) | O2-Sn1-O3 <sup>i</sup>  | 71.05(8)  |
| C12-Sn1-N1  | 106.09(13) | O2-Sn1-O1  | 139.97(8) | O2-Sn1-O4 <sup>i</sup>  | 142.72(9) |
| C16-Sn1-N1  | 100.47(15) | N1-Sn1-O1  | 68.24(9)  | O2-Sn1-O5 <sup>i</sup>  | 148.97(8) |

Symmetry codes: i: -x+3/2, y+1/2, -z+3/2

| 4b                      |             |                         |             |                        |            |
|-------------------------|-------------|-------------------------|-------------|------------------------|------------|
| Sn1-C13                 | 2.130(4)    | Sn1-O1                  | 2.184(3)    | Sn1-O2                 | 2.332(3)   |
| Sn1-C17                 | 2.135(4)    | Sn1-N1                  | 2.254(3)    | Sn1-O4                 | 2.510(3)   |
| Sn1-O2 <sup>i</sup>     | 2.8102(30)  |                         |             |                        |            |
| C13-Sn1-C17             | 159.24(19)  | O1-Sn1-N1               | 70.45(10)   | C13-Sn1-O4             | 81.63(17)  |
| C13-Sn1-O1              | 95.01(15)   | C13-Sn1-O2              | 90.76(15)   | C17-Sn1-O4             | 84.38(16)  |
| C17-Sn1-O1              | 97.07(14)   | C17-Sn1-O2              | 90.65(14)   | O1-Sn1-O4              | 78.23(10)  |
| C13-Sn1-N1              | 99.96(15)   | O1-Sn1-O2               | 140.32(9)   | N1-Sn1-O4              | 148.67(11) |
| C17-Sn1-N1              | 99.96(14)   | N1-Sn1-O2               | 69.89(9)    | O2-Sn1-O4              | 141.40(10) |
| C13-Sn1-C17             | 159.24(19)  | O1-Sn1-N1               | 70.45(10)   | C13-Sn1-O4             | 81.63(17)  |
| C13-Sn1-O2 <sup>i</sup> | 80.327(133) | C17-Sn1-O2 <sup>i</sup> | 81.414(138) | O4-Sn1-O2 <sup>i</sup> | 75.684(98) |
| O2-Sn1-O2 <sup>i</sup>  | 65.737(89)  |                         |             |                        |            |

Symmetry codes: i: -x+1, -y+1, -z+1

| 3b      |          |        |          |                     |            |
|---------|----------|--------|----------|---------------------|------------|
| Sn1-C12 | 2.103(4) | Sn1-O2 | 2.183(3) | Sn1-O3              | 2.224(3)   |
| Sn1-C16 | 2.104(4) | Sn1-N2 | 2.190(3) | Sn1-O3 <sup>i</sup> | 2.9911(28) |

|                         |             |                        |             |                         |             |
|-------------------------|-------------|------------------------|-------------|-------------------------|-------------|
| C12-Sn1-C16             | 145.73(19)  | C16-Sn1-N2             | 111.09(17)  | C16-Sn1-O3              | 95.42(16)   |
| C12-Sn1-O2              | 95.06(15)   | O2-Sn1-N2              | 70.85(11)   | O2-Sn1-O3               | 142.53(10)  |
| C16-Sn1-O2              | 94.91(16)   | C12-Sn1-O3             | 96.31(15)   | N2-Sn1-O3               | 71.82(11)   |
| C12-Sn1-N2              | 103.16(14)  | O3-Sn1-O3 <sup>i</sup> | 62.291(95)  | C12-Sn1-O3 <sup>i</sup> | 78.908(139) |
| C16-Sn1-O3 <sup>i</sup> | 78.350(132) | O2-Sn1-O3 <sup>i</sup> | 155.170(92) |                         |             |

Symmetry codes: i: -x, -y, -z

#### 4a

|             |            |            |            |                         |            |
|-------------|------------|------------|------------|-------------------------|------------|
| Sn1-C19     | 2.1112(19) | Sn1-N1     | 2.2218(15) | Sn1-O2                  | 2.1557(13) |
| Sn1-C13     | 2.1166(19) | Sn1-O1     | 2.2315(13) | Sn1-O3 <sup>i</sup>     | 2.4170(13) |
| C19-Sn1-C13 | 154.50(8)  | O2-Sn1-N1  | 72.55(5)   | C19-Sn1-O3 <sup>i</sup> | 83.03(6)   |
| C19-Sn1-O2  | 97.10(7)   | C19-Sn1-O1 | 88.18(7)   | C13-Sn1-O3 <sup>i</sup> | 84.63(6)   |
| C13-Sn1-O2  | 100.40(7)  | C13-Sn1-O1 | 89.58(7)   | O2-Sn1-O3 <sup>i</sup>  | 72.71(5)   |
| C19-Sn1-N1  | 106.22(7)  | O2-Sn1-O1  | 141.43(5)  | N1-Sn1-O3 <sup>i</sup>  | 144.88(5)  |
| C13-Sn1-N1  | 96.68(6)   | N1-Sn1-O1  | 69.32(5)   | O1-Sn1-O3 <sup>i</sup>  | 145.74(5)  |

Symmetry codes: i: -x+3/2, y-1/2, -z+1/2

#### 5a

|             |           |            |            |                         |            |
|-------------|-----------|------------|------------|-------------------------|------------|
| Sn1-C13     | 2.141(3)  | Sn1-O2     | 2.1814(17) | Sn1-O1                  | 2.2915(18) |
| Sn1-C19     | 2.147(3)  | Sn1-N1     | 2.247(2)   | Sn1-O3 <sup>i</sup>     | 2.4474(19) |
| C13-Sn1-C19 | 151.93(9) | O2-Sn1-N1  | 72.22(7)   | C13-Sn1-O3 <sup>i</sup> | 84.64(8)   |
| C13-Sn1-O2  | 100.08(8) | C13-Sn1-O1 | 88.29(8)   | C19-Sn1-O3 <sup>i</sup> | 84.19(7)   |
| C19-Sn1-O2  | 100.34(8) | C19-Sn1-O1 | 87.73(8)   | O2-Sn1-O3 <sup>i</sup>  | 70.61(5)   |
| C13-Sn1-N1  | 97.76(8)  | O2-Sn1-O1  | 141.28(6)  | N1-Sn1-O3 <sup>i</sup>  | 142.58(6)  |
| C19-Sn1-N1  | 106.70(8) | N1-Sn1-O1  | 69.20(7)   | O1-Sn1-O3 <sup>i</sup>  | 148.10(5)  |

Symmetry codes: i: x-1/2, -y+1/2, -z

#### 5b

|                         |            |                         |            |                        |            |
|-------------------------|------------|-------------------------|------------|------------------------|------------|
| Sn1-C17                 | 2.119(3)   | Sn1-O1                  | 2.1681(18) | Sn1-O2                 | 2.3019(17) |
| Sn1-C13                 | 2.122(3)   | Sn1-N1                  | 2.241(2)   | Sn1-O5                 | 2.487(2)   |
| Sn1-O2 <sup>i</sup>     | 2.787(2)   |                         |            |                        |            |
| C17-Sn1-C13             | 159.30(12) | O1-Sn1-N1               | 70.19(7)   | C17-Sn1-O5             | 86.05(11)  |
| C17-Sn1-O1              | 96.84(10)  | C17-Sn1-O2              | 90.04(10)  | C13-Sn1-O5             | 80.04(10)  |
| C13-Sn1-O1              | 95.06(9)   | C13-Sn1-O2              | 91.54(9)   | O1-Sn1-O5              | 77.57(7)   |
| C17-Sn1-N1              | 98.67(10)  | O1-Sn1-O2               | 140.38(6)  | N1-Sn1-O5              | 147.73(8)  |
| C13-Sn1-N1              | 101.28(9)  | N1-Sn1-O2               | 70.20(7)   | O2-Sn1-O5              | 141.99(7)  |
| C13-Sn1-O2 <sup>i</sup> | 81.64(7)   | C17-Sn1-O2 <sup>i</sup> | 80.09(10)  | O5-Sn1-O2 <sup>i</sup> | 75.64(6)   |
| O2-Sn1-O2 <sup>i</sup>  | 66.45(6)   |                         |            |                        |            |

Symmetry codes: i: -x+1, -y+1, -z+1

#### 6a

|             |           |            |            |            |            |
|-------------|-----------|------------|------------|------------|------------|
| Sn1-C16     | 2.108(2)  | Sn1-O2     | 2.1230(15) | Sn1-N1     | 2.1498(17) |
| Sn1-C22     | 2.108(2)  | Sn1-O1     | 2.1451(15) |            |            |
| C16-Sn1-C22 | 122.93(8) | C22-Sn1-O1 | 96.78(7)   | C22-Sn1-N1 | 120.57(7)  |
| C16-Sn1-O2  | 98.37(7)  | O2-Sn1-O1  | 147.04(6)  | O2-Sn1-N1  | 74.80(6)   |
| C22-Sn1-O2  | 99.04(8)  | C16-Sn1-N1 | 116.40(7)  | O1-Sn1-N1  | 72.26(6)   |
| C16-Sn1-O1  | 96.94(7)  |            |            |            |            |

#### 6b

|                                     |             |                         |             |                        |             |
|-------------------------------------|-------------|-------------------------|-------------|------------------------|-------------|
| Sn1-C20                             | 2.101(5)    | Sn1-O2                  | 2.310(3)    | Sn1-O1                 | 2.175(3)    |
| Sn1-C16                             | 2.115(5)    | Sn1-O4                  | 2.443(4)    | Sn1-N1                 | 2.245(3)    |
| Sn1-O2 <sup>i</sup>                 | 2.7598(29)  |                         |             |                        |             |
| C20-Sn1-C16                         | 160.5(2)    | O1-Sn1-N1               | 70.06(11)   | C20-Sn1-O4             | 81.9(2)     |
| C20-Sn1-O1                          | 94.23(17)   | C20-Sn1-O2              | 91.67(17)   | C16-Sn1-O4             | 84.3(2)     |
| C16-Sn1-O1                          | 96.23(18)   | C16-Sn1-O2              | 90.9(2)     | O2-Sn1-O4              | 142.15(12)  |
| C20-Sn1-N1                          | 99.98(17)   | O1-Sn1-O2               | 139.83(10)  | O1-Sn1-O4              | 78.00(12)   |
| C16-Sn1-N1                          | 99.0(2)     | N1-Sn1-O2               | 69.78(10)   | N1-Sn1-O4              | 148.06(12)  |
| C16-Sn1-O2 <sup>i</sup>             | 81.898(182) | C20-Sn1-O2 <sup>i</sup> | 81.409(149) | O4-Sn1-O2 <sup>i</sup> | 75.377(128) |
| O2-Sn1-O2 <sup>i</sup>              | 66.776(82)  |                         |             |                        |             |
| Symmetry codes: i: -x+1, -y+2, -z+1 |             |                         |             |                        |             |

**7a**

|                                   |           |                         |            |                        |            |
|-----------------------------------|-----------|-------------------------|------------|------------------------|------------|
| Sn1-C18                           | 2.117(3)  | Sn1-O1                  | 2.1730(18) | Sn1-O6                 | 2.299(2)   |
| Sn1-C12                           | 2.131(3)  | Sn1-N1                  | 2.273(2)   | Sn1-O2                 | 2.3854(18) |
| Sn1-O2 <sup>i</sup>               | 2.566(1)  |                         |            |                        |            |
| C18-Sn1-C12                       | 171.04(9) | O1-Sn1-N1               | 69.51(7)   | C18-Sn1-O2             | 88.82(9)   |
| C18-Sn1-O1                        | 92.42(9)  | C18-Sn1-O6              | 89.56(10)  | C12-Sn1-O2             | 89.92(9)   |
| C12-Sn1-O1                        | 94.47(9)  | C12-Sn1-O6              | 86.34(10)  | O1-Sn1-O2              | 137.75(6)  |
| C18-Sn1-N1                        | 95.09(9)  | O1-Sn1-O6               | 77.54(7)   | N1-Sn1-O2              | 68.32(7)   |
| C12-Sn1-N1                        | 92.68(9)  | N1-Sn1-O6               | 146.87(7)  | O6-Sn1-O2              | 144.71(7)  |
| C18-Sn1-O2 <sup>i</sup>           | 85.39(2)  | C12-Sn1-O2 <sup>i</sup> | 85.95(2)   | O1-Sn1-O2 <sup>i</sup> | 155.03(2)  |
| O2-Sn1-O2 <sup>i</sup>            | 67.16(2)  | N1-Sn1-O2 <sup>i</sup>  | 135.46(2)  | O6-Sn1-O2 <sup>i</sup> | 77.57(2)   |
| Symmetry codes: i: -x+1, -y, -z+2 |           |                         |            |                        |            |

**7b**

|                                           |             |                         |             |                        |             |
|-------------------------------------------|-------------|-------------------------|-------------|------------------------|-------------|
| Sn1-C16                                   | 2.081(6)    | Sn1-O1                  | 2.194(3)    | Sn1-O2                 | 2.329(3)    |
| Sn1-C12                                   | 2.123(7)    | Sn1-N1                  | 2.256(3)    | Sn1-O6                 | 2.457(4)    |
| Sn1-O2 <sup>i</sup>                       | 2.7294(33)  |                         |             |                        |             |
| C16-Sn1-C12                               | 160.0(3)    | O1-Sn1-N1               | 69.69(12)   | C16-Sn1-O6             | 82.7(2)     |
| C16-Sn1-O1                                | 94.55(19)   | C16-Sn1-O2              | 91.9(2)     | C12-Sn1-O6             | 84.1(3)     |
| C12-Sn1-O1                                | 96.8(2)     | C12-Sn1-O2              | 90.3(2)     | O1-Sn1-O6              | 76.28(13)   |
| C16-Sn1-N1                                | 101.60(18)  | O1-Sn1-O2               | 138.98(10)  | N1-Sn1-O6              | 145.91(13)  |
| C12-Sn1-N1                                | 97.7(3)     | N1-Sn1-O2               | 69.33(11)   | O2-Sn1-O6              | 144.74(12)  |
| C12-Sn1-O2 <sup>i</sup>                   | 81.440(215) | C16-Sn1-O2 <sup>i</sup> | 81.269(147) | O6-Sn1-O2 <sup>i</sup> | 78.316(124) |
| Symmetry codes: i: -x+3/2, -y+3/2, -z+3/2 |             |                         |             |                        |             |

**8a**

|                                          |            |            |            |                         |            |
|------------------------------------------|------------|------------|------------|-------------------------|------------|
| Sn1-C16                                  | 2.132(3)   | Sn1-N1     | 2.2405(19) | Sn1-O2                  | 2.1734(17) |
| Sn1-C10                                  | 2.133(2)   | Sn1-O1     | 2.2553(18) | Sn1-O3 <sup>i</sup>     | 2.4090(18) |
| C16-Sn1-C10                              | 154.96(10) | O2-Sn1-N1  | 72.25(6)   | C16-Sn1-O3 <sup>i</sup> | 85.02(8)   |
| C16-Sn1-O2                               | 101.39(8)  | C16-Sn1-O1 | 87.36(8)   | C10-Sn1-O3 <sup>i</sup> | 84.33(8)   |
| C10-Sn1-O2                               | 97.42(8)   | C10-Sn1-O1 | 88.16(8)   | O2-Sn1-O3 <sup>i</sup>  | 74.27(6)   |
| C16-Sn1-N1                               | 97.02(8)   | O2-Sn1-O1  | 141.45(6)  | N1-Sn1-O3 <sup>i</sup>  | 146.20(6)  |
| C10-Sn1-N1                               | 104.40(8)  | N1-Sn1-O1  | 69.43(7)   | O1-Sn1-O3 <sup>i</sup>  | 144.25(6)  |
| Symmetry codes: i: -x+1/2, y+1/2, -z+1/2 |            |            |            |                         |            |

**8b**

|             |            |             |            |             |            |
|-------------|------------|-------------|------------|-------------|------------|
| Sn1-C10     | 2.115(3)   | Sn1-C14     | 2.120(3)   | Sn1-O1      | 2.1771(18) |
| Sn1-N1      | 2.245(2)   | Sn1-O2      | 2.3206(18) | Sn1-O5      | 2.428(2)   |
| Sn2-C32     | 2.114(3)   | Sn2-C28     | 2.123(3)   | Sn2-O6      | 2.1814(19) |
| Sn2-N3      | 2.255(2)   | Sn2-O7      | 2.2944(18) | Sn2-O10     | 2.484(2)   |
| Sn1-O7      | 2.8216(17) | Sn2-O2      | 2.7928(17) |             |            |
| C10-Sn1-C14 | 160.57(12) | C10-Sn1-O1  | 96.85(10)  | C14-Sn1-O1  | 95.85(10)  |
| C10-Sn1-N1  | 99.70(10)  | C14-Sn1-N1  | 98.38(10)  | O1-Sn1-N1   | 70.43(7)   |
| C10-Sn1-O2  | 89.17(9)   | C14-Sn1-O2  | 90.46(10)  | O1-Sn1-O2   | 140.16(6)  |
| N1-Sn1-O2   | 69.74(7)   | C10-Sn1-O5  | 85.03(11)  | C14-Sn1-O5  | 83.23(11)  |
| O1-Sn1-O5   | 78.23(8)   | N1-Sn1-O5   | 148.63(8)  | O2-Sn1-O5   | 141.61(7)  |
| C32-Sn2-C28 | 160.84(11) | C32-Sn2-O6  | 93.94(10)  | C28-Sn2-O6  | 95.29(9)   |
| C32-Sn2-N3  | 101.99(10) | C28-Sn2-N3  | 96.94(9)   | O6-Sn2-N3   | 70.16(8)   |
| C32-Sn2-O7  | 91.67(10)  | C28-Sn2-O7  | 92.00(9)   | O6-Sn2-O7   | 140.00(7)  |
| N3-Sn2-O7   | 69.93(7)   | C32-Sn2-O10 | 80.99(10)  | C28-Sn2-O10 | 84.66(9)   |
| O6-Sn2-O10  | 77.51(7)   | N3-Sn2-O10  | 147.64(8)  | O7-Sn2-O10  | 142.42(7)  |
| C10-Sn1-O7  | 79.352(85) | C14-Sn1-O7  | 82.653(91) | O2-Sn1-O7   | 66.832(60) |
| O5-Sn1-O7   | 74.802(70) | C32-Sn2-O2  | 82.422(90) | C28-Sn2-O2  | 81.60(8)   |
| O10-Sn2-O2  | 74.811(64) | O7-Sn2-O2   | 67.669(61) |             |            |

**9a**

|             |            |            |           |                         |           |
|-------------|------------|------------|-----------|-------------------------|-----------|
| Sn1-C16     | 2.122(3)   | Sn1-C10    | 2.125(3)  | Sn1-O2                  | 2.174(2)  |
| Sn1-O1      | 2.261(2)   | Sn1-N1     | 2.234(2)  | Sn1-O3 <sup>i</sup>     | 2.396(2)  |
| C16-Sn1-C10 | 156.51(13) | O2-Sn1-N1  | 72.04(8)  | C16-Sn1-O3              | 84.13(10) |
| C16-Sn1-O2  | 96.96(11)  | C16-Sn1-O1 | 88.00(11) | C10-Sn1-O3 <sup>i</sup> | 85.35(10) |
| C10-Sn1-O2  | 100.06(11) | C10-Sn1-O1 | 88.77(11) | O2-Sn1-O3 <sup>i</sup>  | 73.42(7)  |
| C16-Sn1-N1  | 103.85(11) | O2-Sn1-O1  | 141.23(8) | N1-Sn1-O3 <sup>i</sup>  | 145.24(8) |
| C10-Sn1-N1  | 96.75(11)  | N1-Sn1-O1  | 69.45(8)  | O1-Sn1-O3 <sup>i</sup>  | 145.27(7) |

Symmetry codes: i: -x+1/2, y+1/2, -z+1/2

**9b**

|                         |             |                         |             |                        |            |
|-------------------------|-------------|-------------------------|-------------|------------------------|------------|
| Sn1-C10                 | 2.106(4)    | Sn1-O1                  | 2.175(2)    | Sn1-O2                 | 2.293(2)   |
| Sn1-C14                 | 2.115(3)    | Sn1-N1                  | 2.244(3)    | Sn1-O4                 | 2.473(3)   |
| Sn1-O2 <sup>i</sup>     | 2.7895(22)  |                         |             |                        |            |
| C10-Sn1-C14             | 159.70(15)  | O1-Sn1-N1               | 70.31(9)    | C10-Sn1-O4             | 80.90(15)  |
| C10-Sn1-O1              | 94.79(14)   | C10-Sn1-O2              | 90.90(14)   | C14-Sn1-O4             | 84.47(13)  |
| C14-Sn1-O1              | 95.65(12)   | C14-Sn1-O2              | 92.10(12)   | O1-Sn1-O4              | 77.35(9)   |
| C10-Sn1-N1              | 99.04(14)   | O1-Sn1-O2               | 140.35(8)   | N1-Sn1-O4              | 147.56(10) |
| C14-Sn1-N1              | 100.86(12)  | N1-Sn1-O2               | 70.05(8)    | O2-Sn1-O4              | 142.21(9)  |
| C10-Sn1-O2 <sup>i</sup> | 80.829(114) | C14-Sn1-O2 <sup>i</sup> | 81.905(112) | O4-Sn1-O2 <sup>i</sup> | 75.251(88) |
| O2-Sn1-O2 <sup>i</sup>  | 67.011(78)  |                         |             |                        |            |

Symmetry codes: i: -x+1, -y+1, -z+1

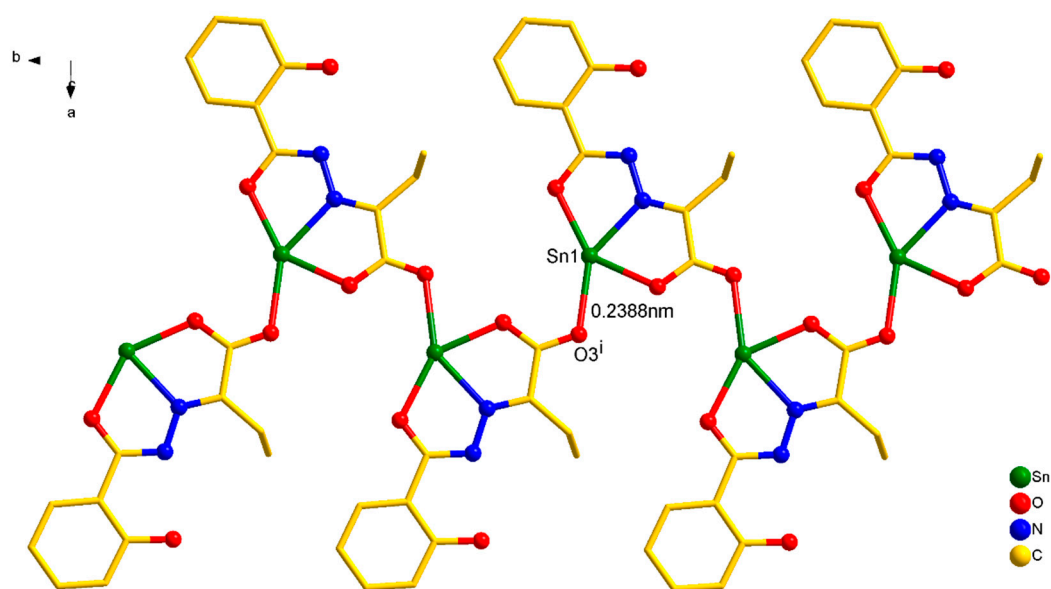

Figure S4 The 1D structures of **2a**.

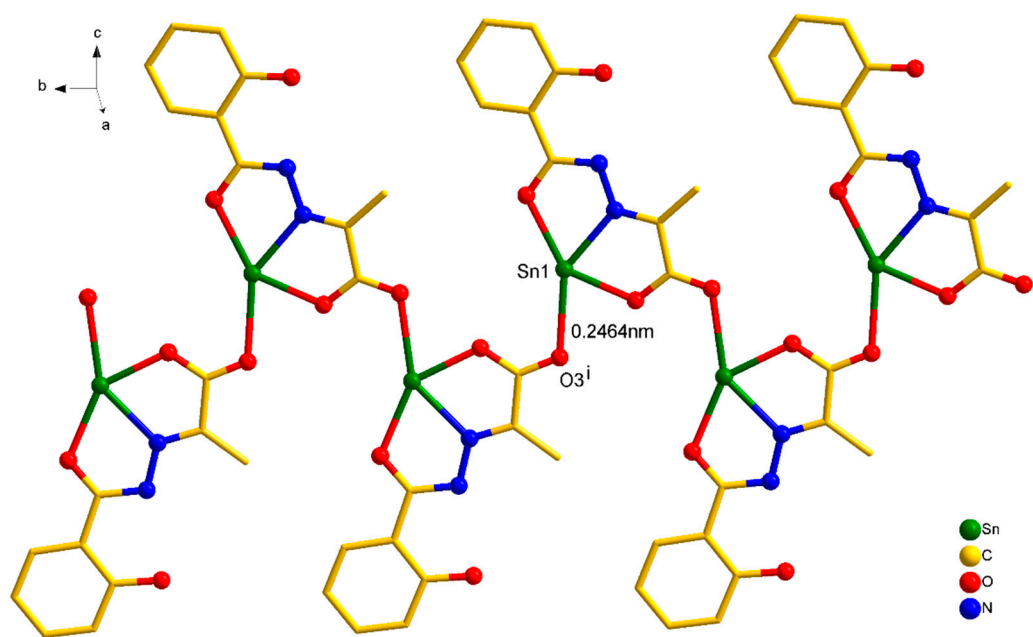

Figure S5 The 1D structures of **2b**.

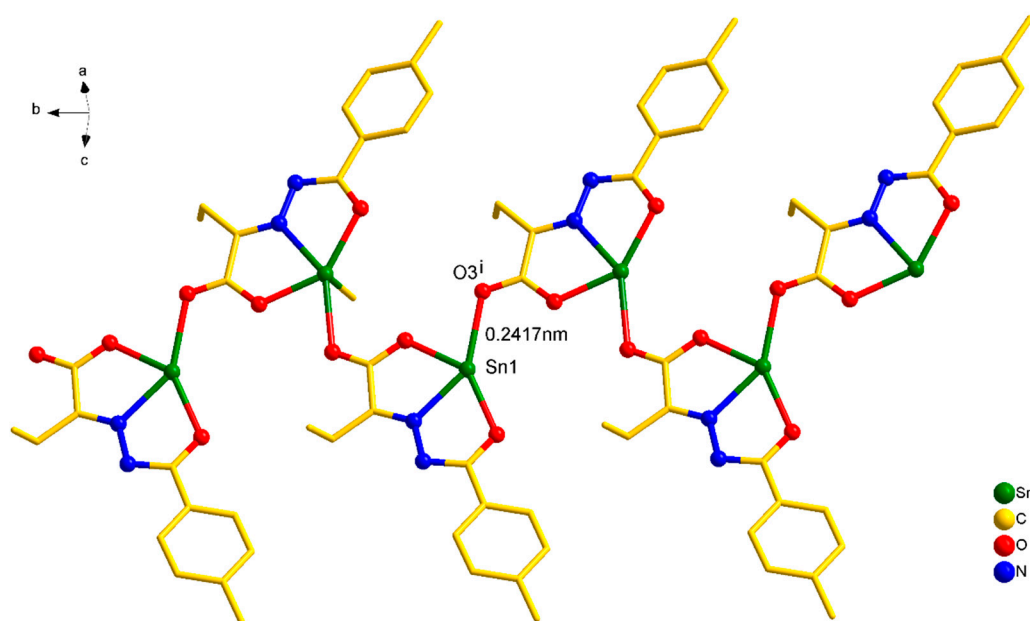

Figure S6 The 1D structures of **4a**.

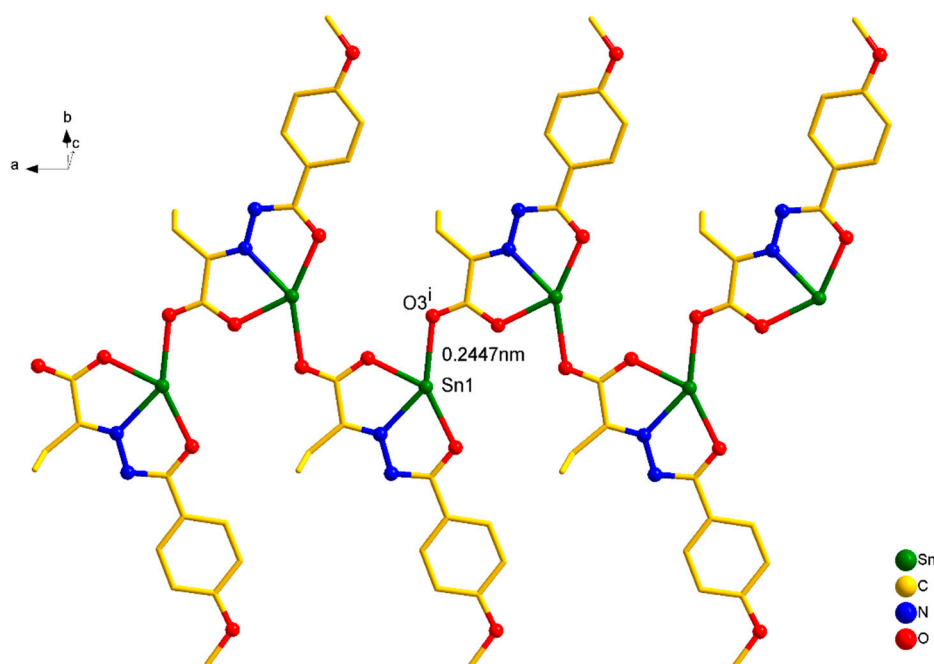

Figure S7 The 1D structures of **5a**.

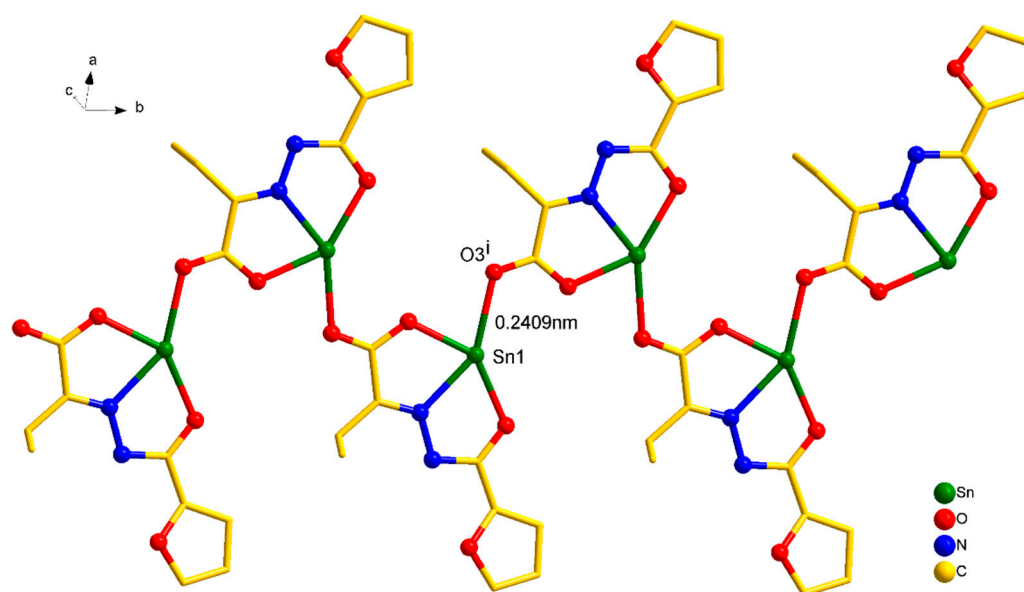

Figure S8 The 1D structures of **8a**.

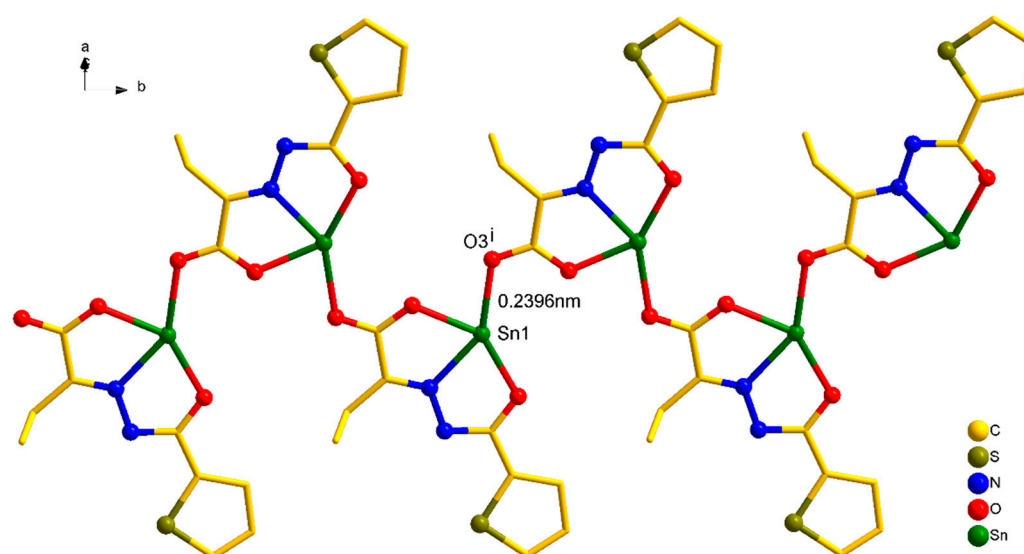

Figure S9 The 1D structures of **9a**.

### 3 Spectra

#### 3.1 The IR spectra of **1a-9b**.

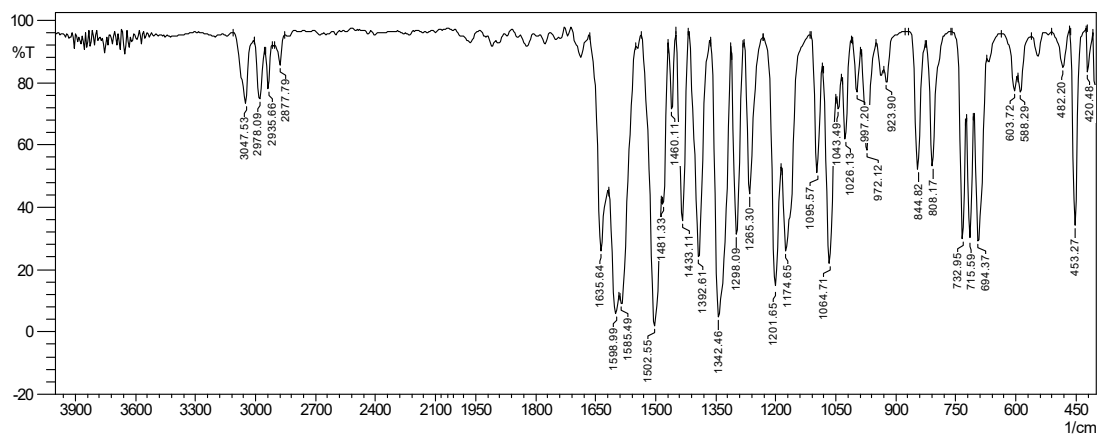

Figure S10 The IR spectra of **1a**

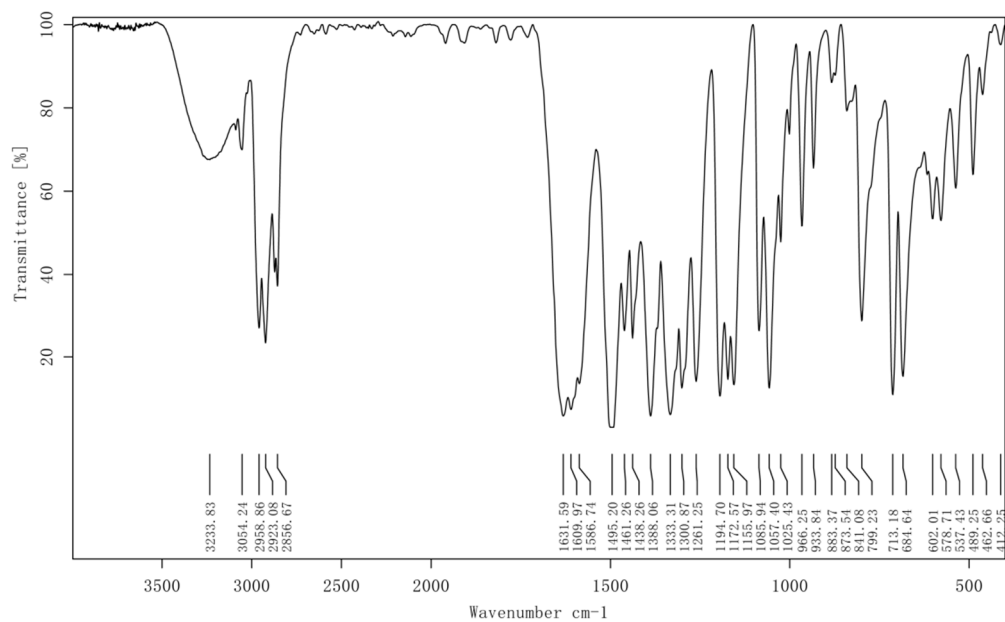

Figure S11 The IR spectra of **1b**



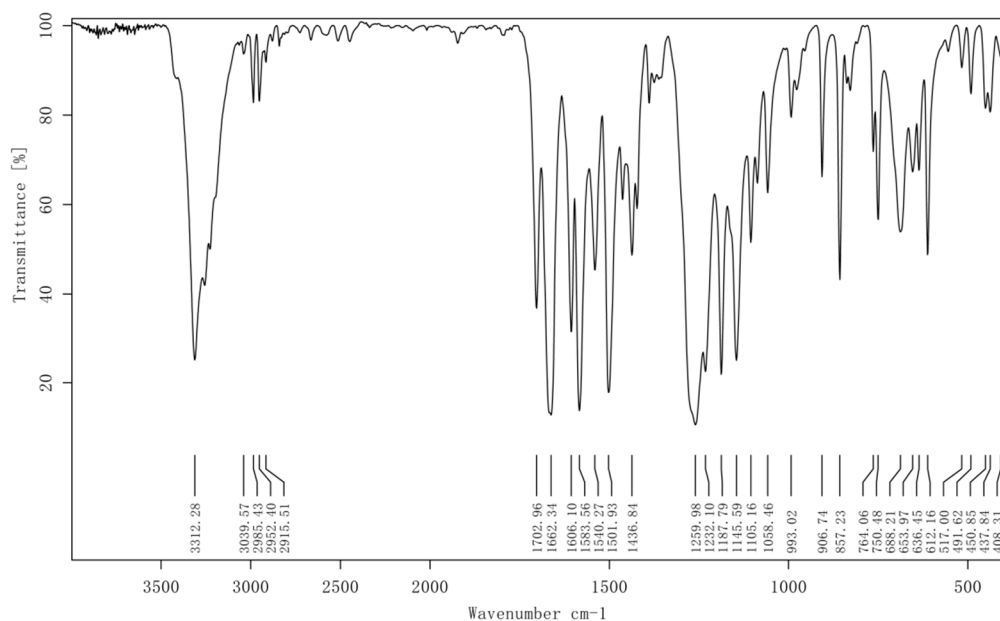

Figure S12 The IR spectra of **2a**

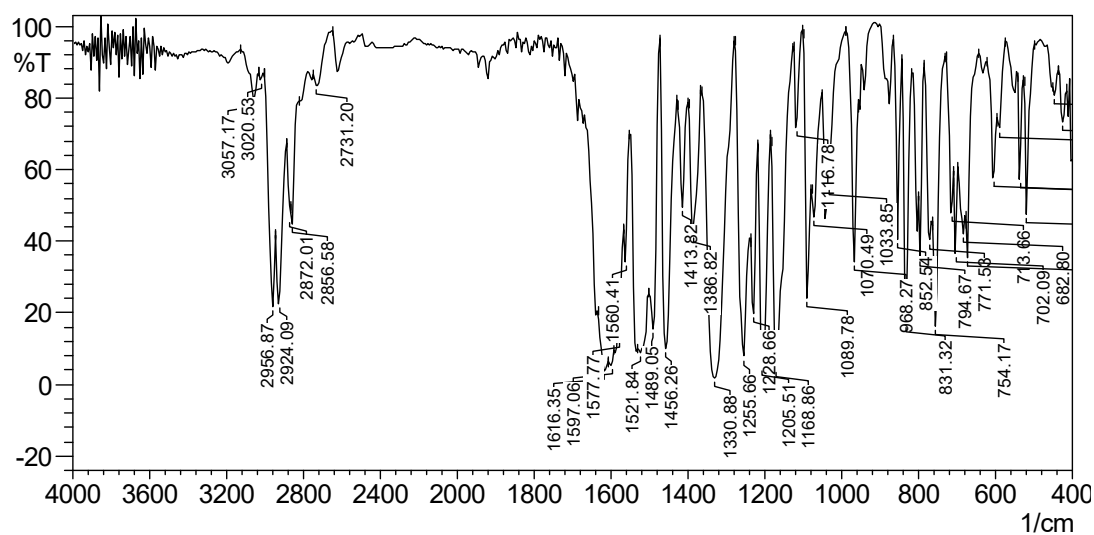

Figure S13 The IR spectra of **2b**

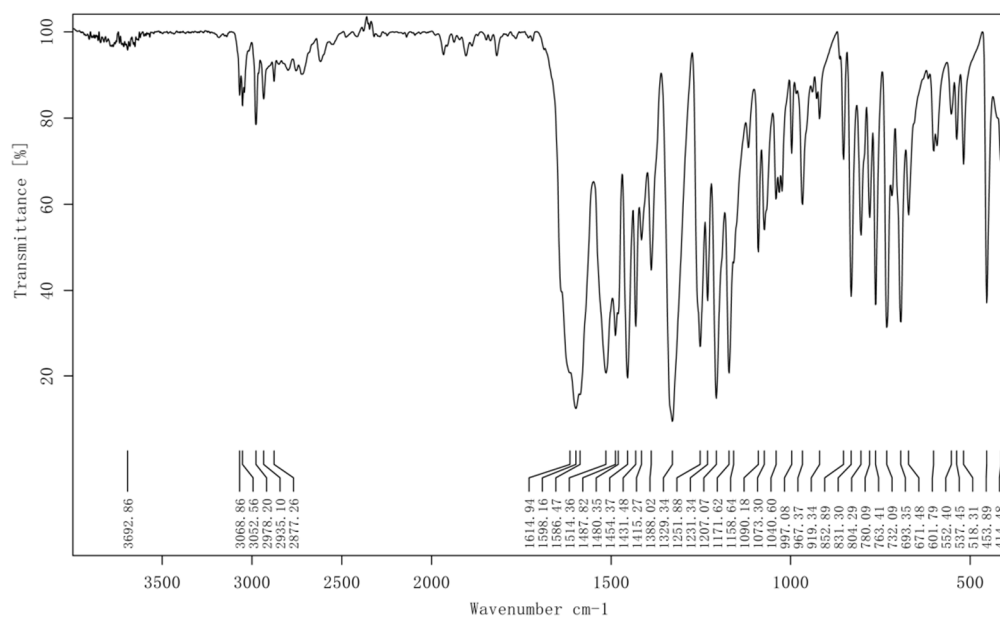

Figure S14 The IR spectra of **3a**

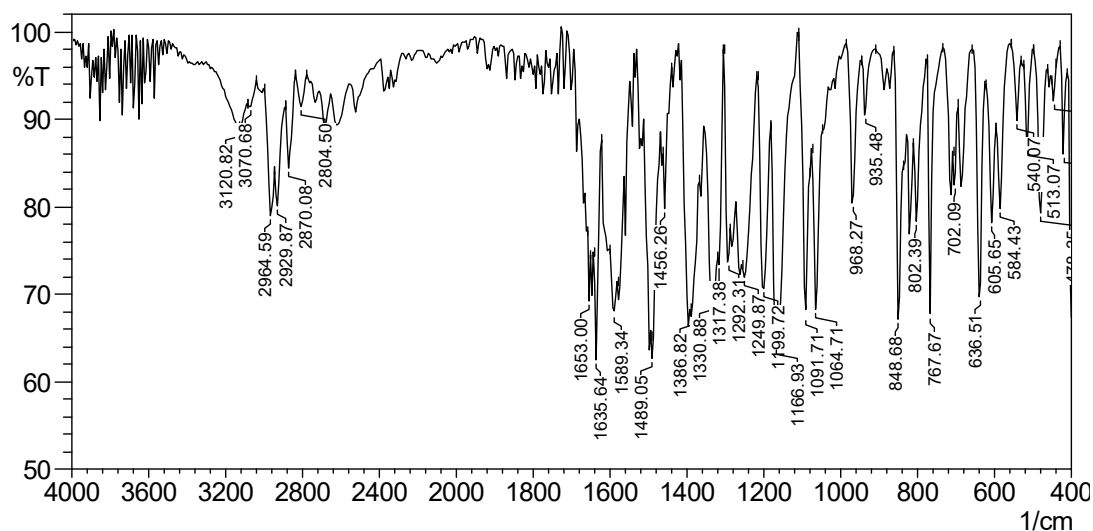

Figure S15 The IR spectra of **3b**

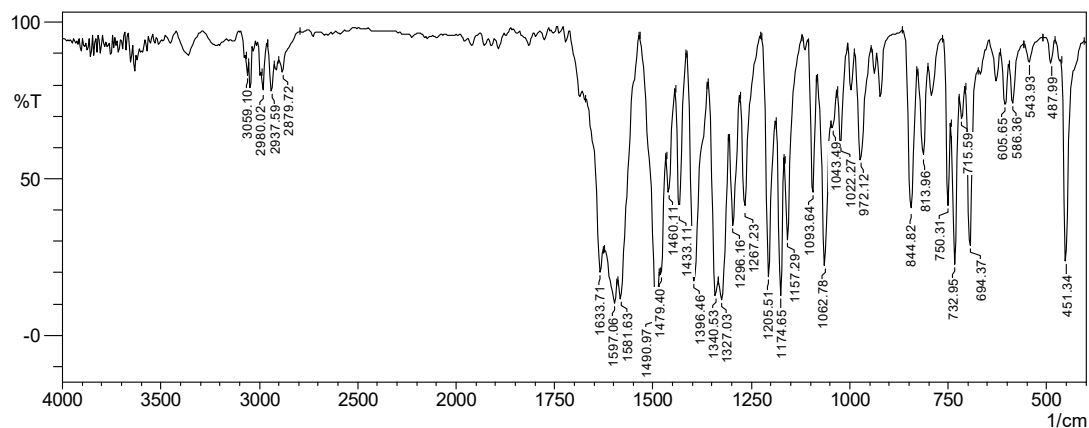

Figure S16 The IR spectra of **4a**

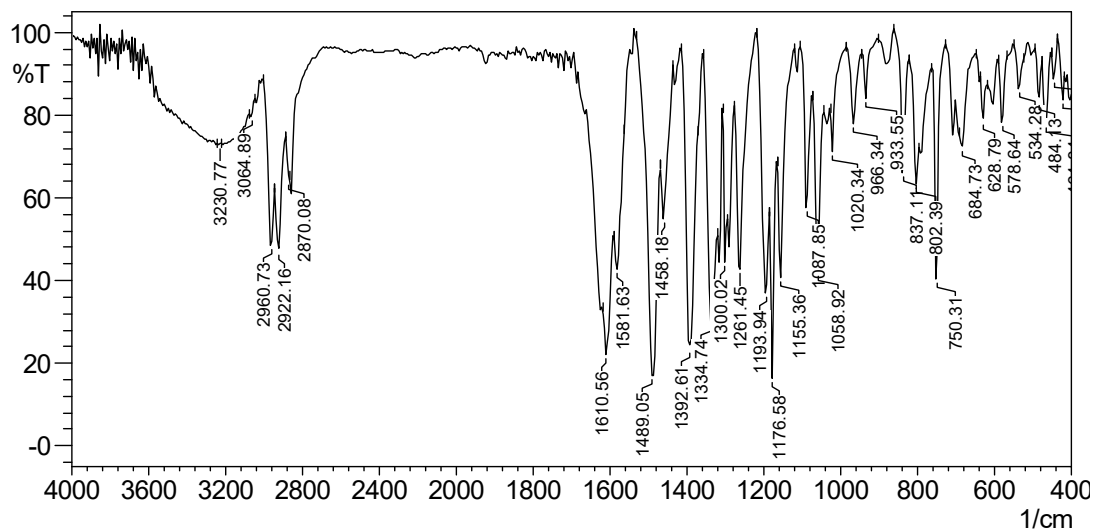

Figure S17 The IR spectra of **4b**

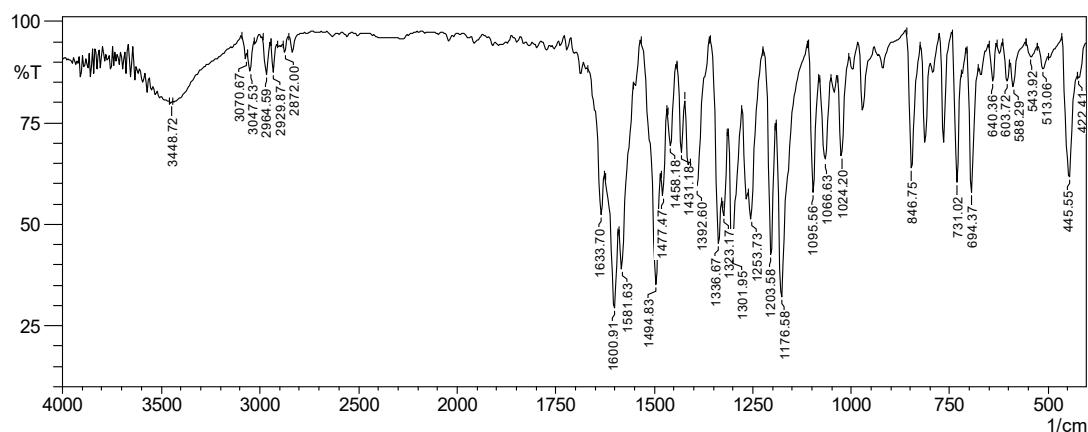

Figure S18 The IR spectra of **5a**

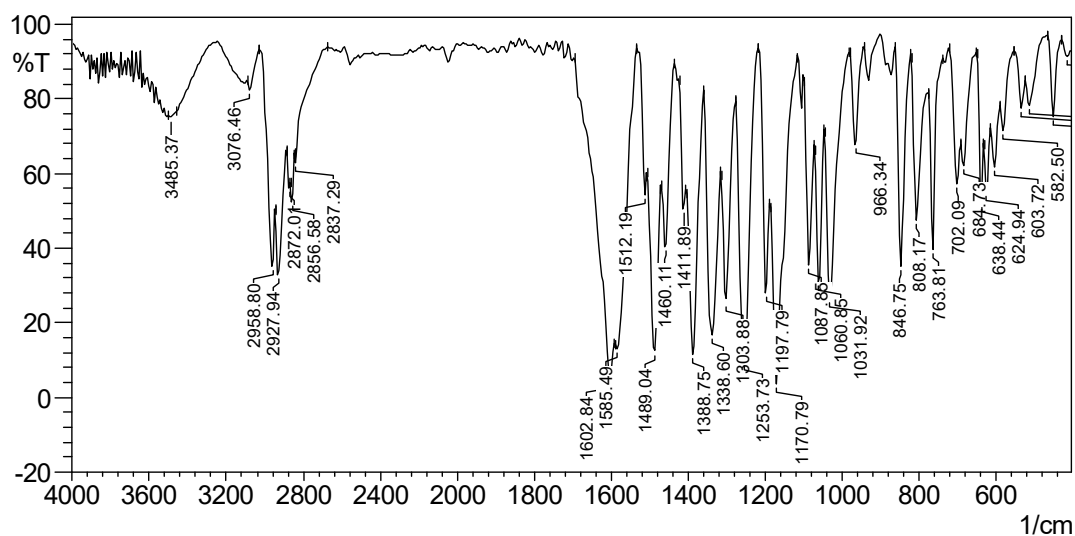

Figure S19 The IR spectra of **5b**

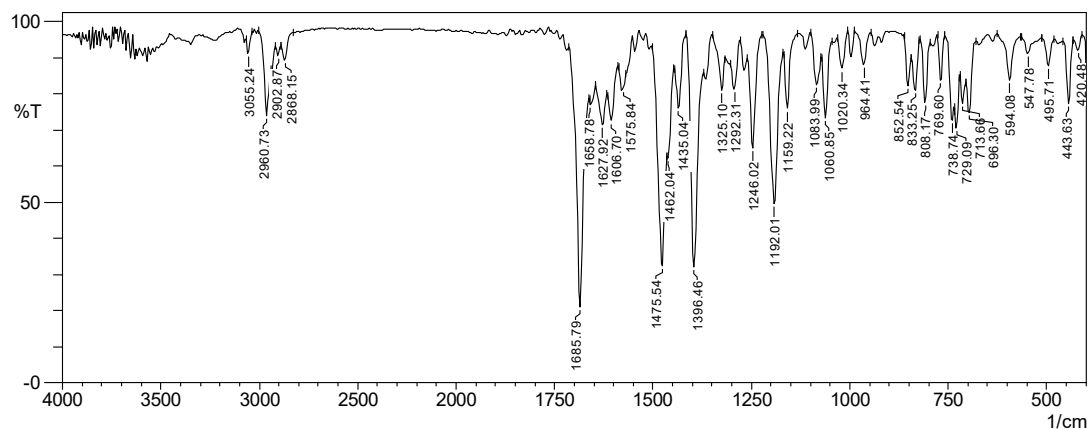

Figure S20 The IR spectra of **6a**

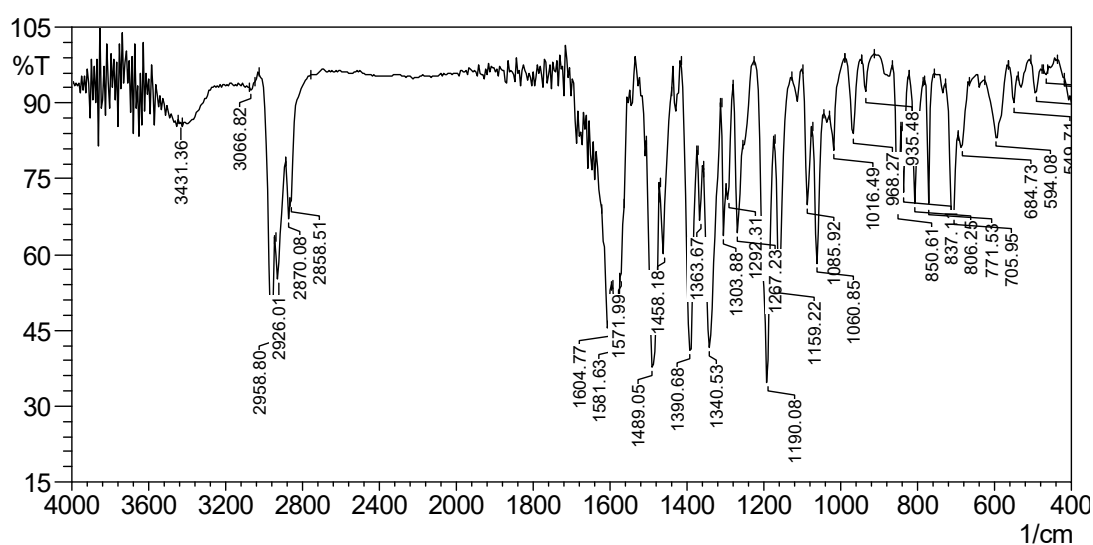

Figure S21 The IR spectra of **6b**

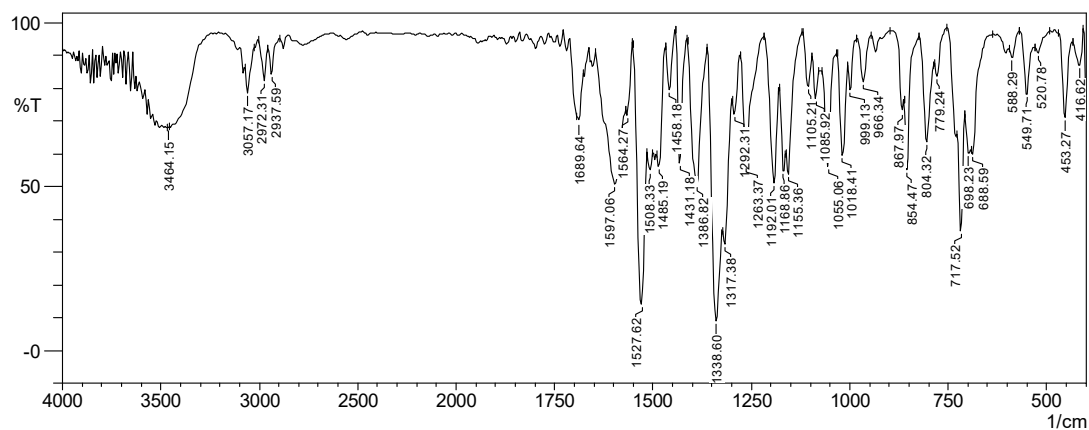

Figure S22 The IR spectra of **7a**

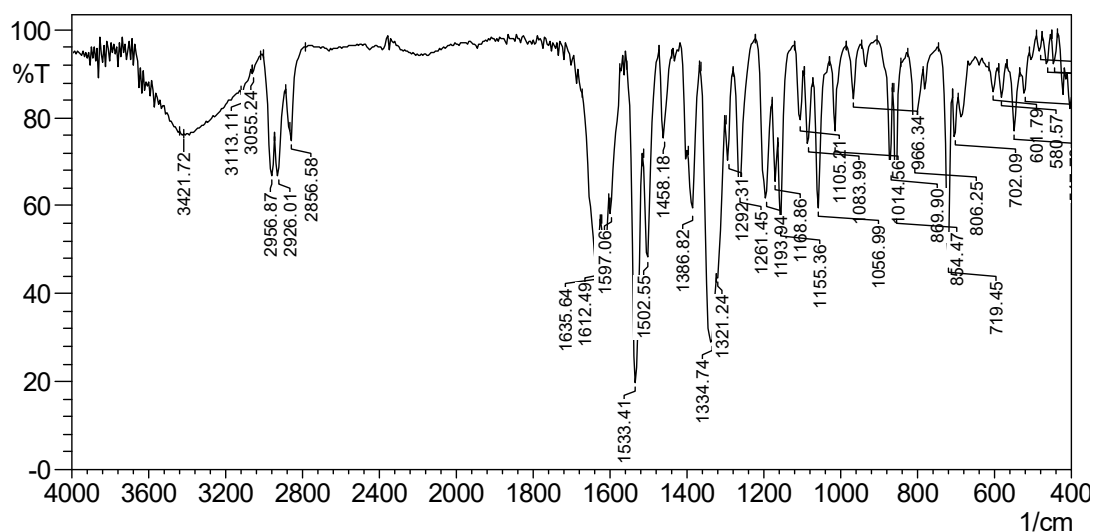

Figure S23 The IR spectra of **7b**

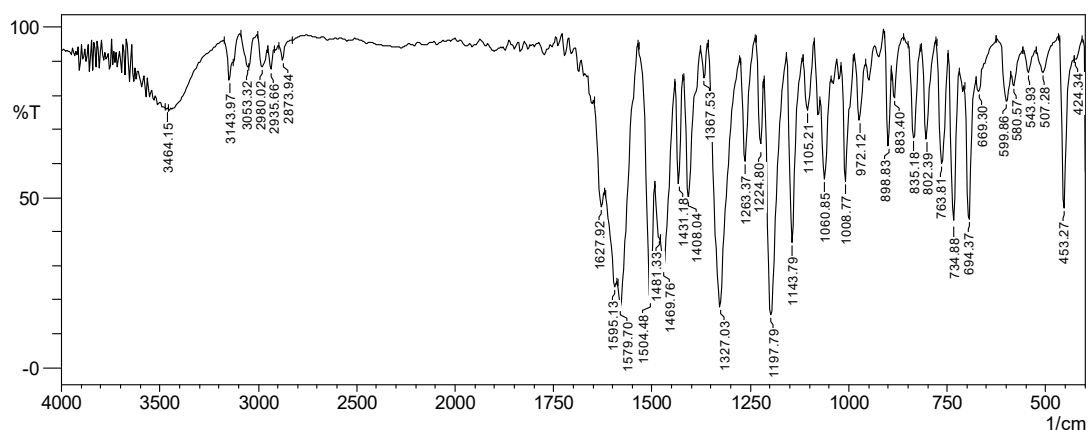

Figure S24 The IR spectra of **8a**

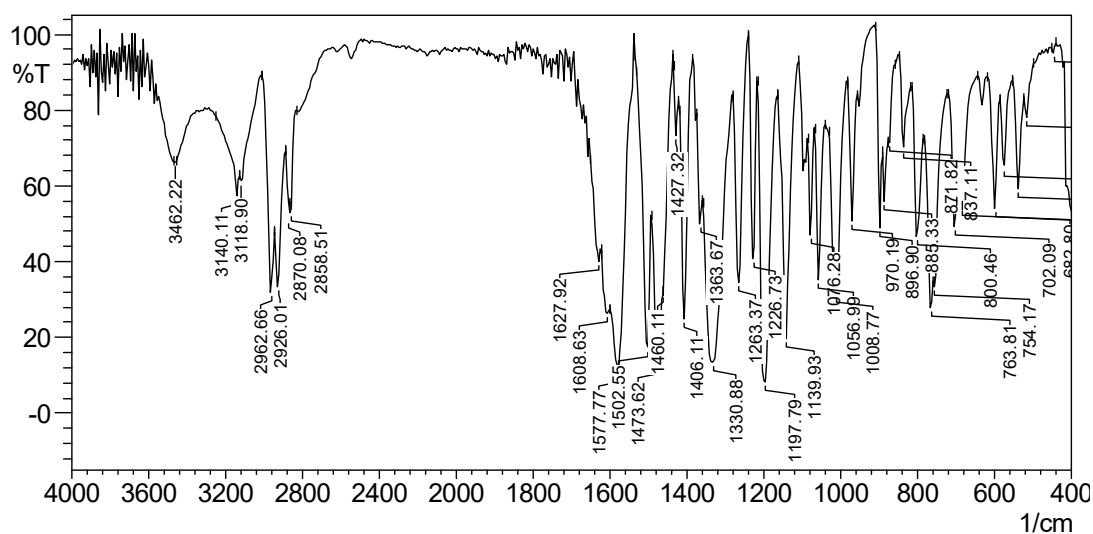

Figure S25 The IR spectra of **8b**

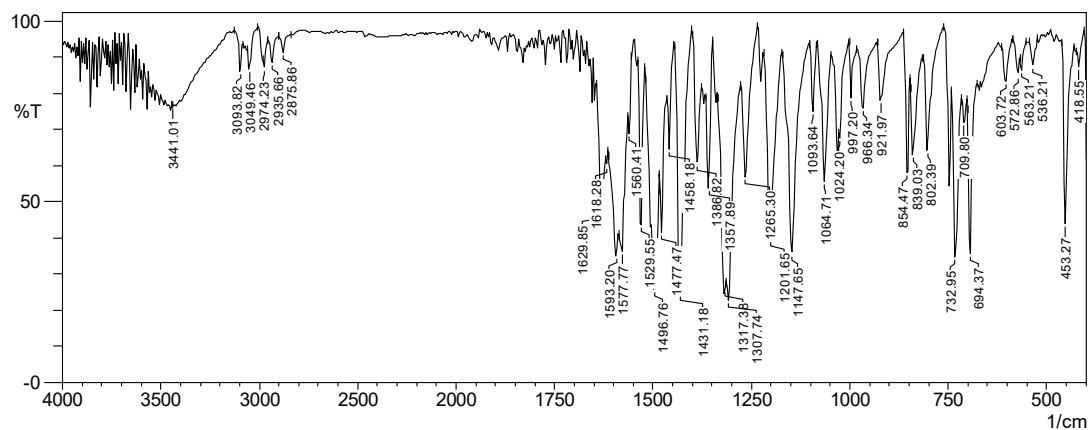

Figure S26 The IR spectra of **9a**

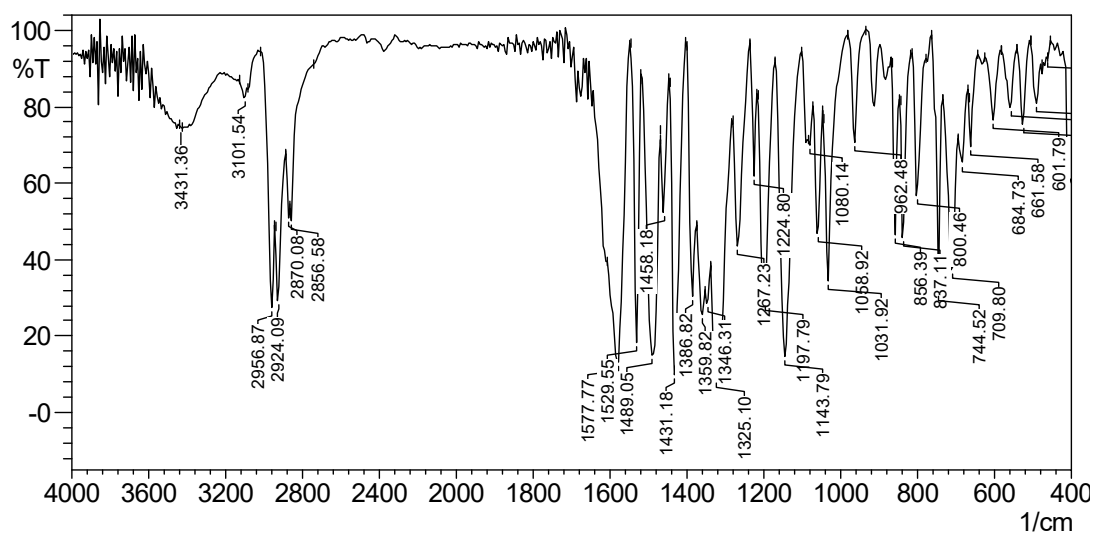

Figure S27 The IR spectra of **9b**

### 3.2 The NMR spectra of **1a-9b**.

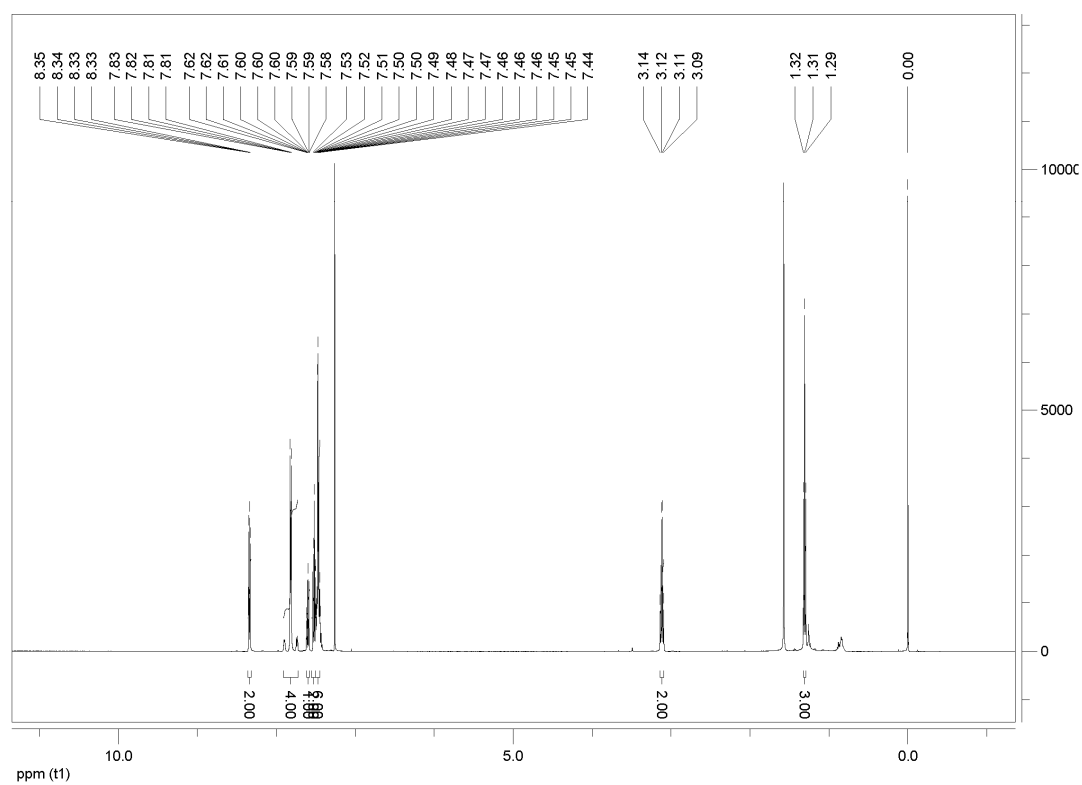

Figure S28 The <sup>1</sup>H NMR spectra of **1a**

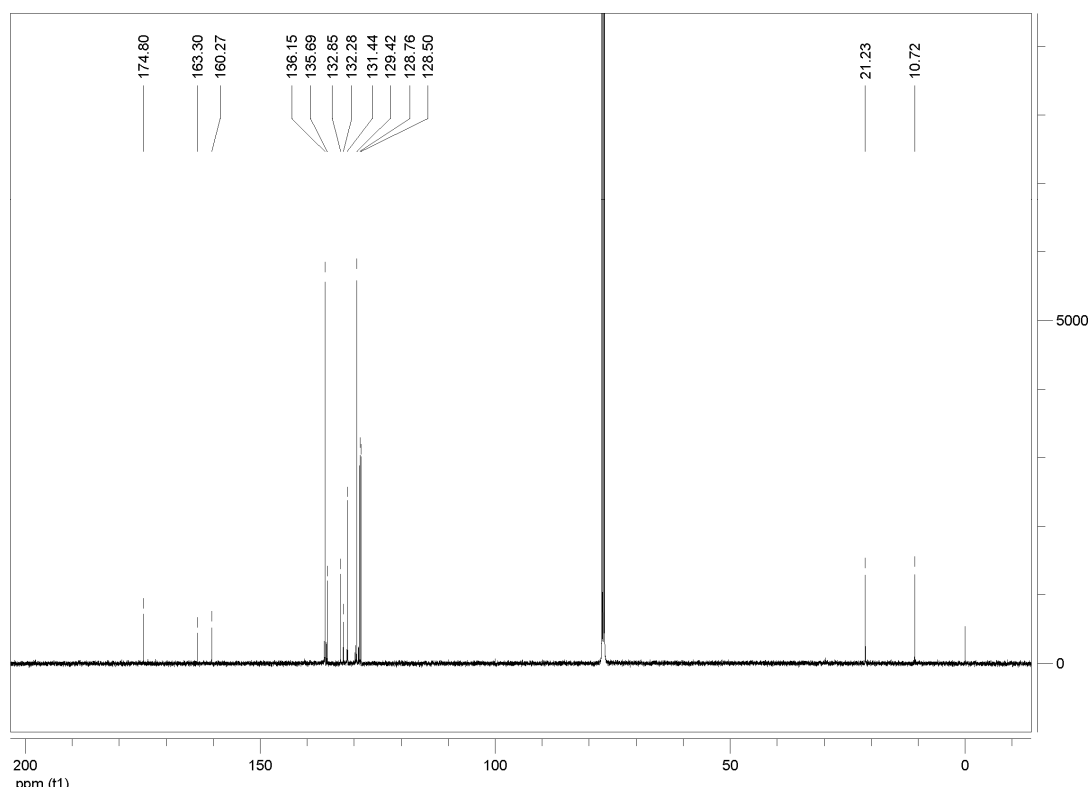

Figure S29 The <sup>13</sup>C NMR spectra of **1a**

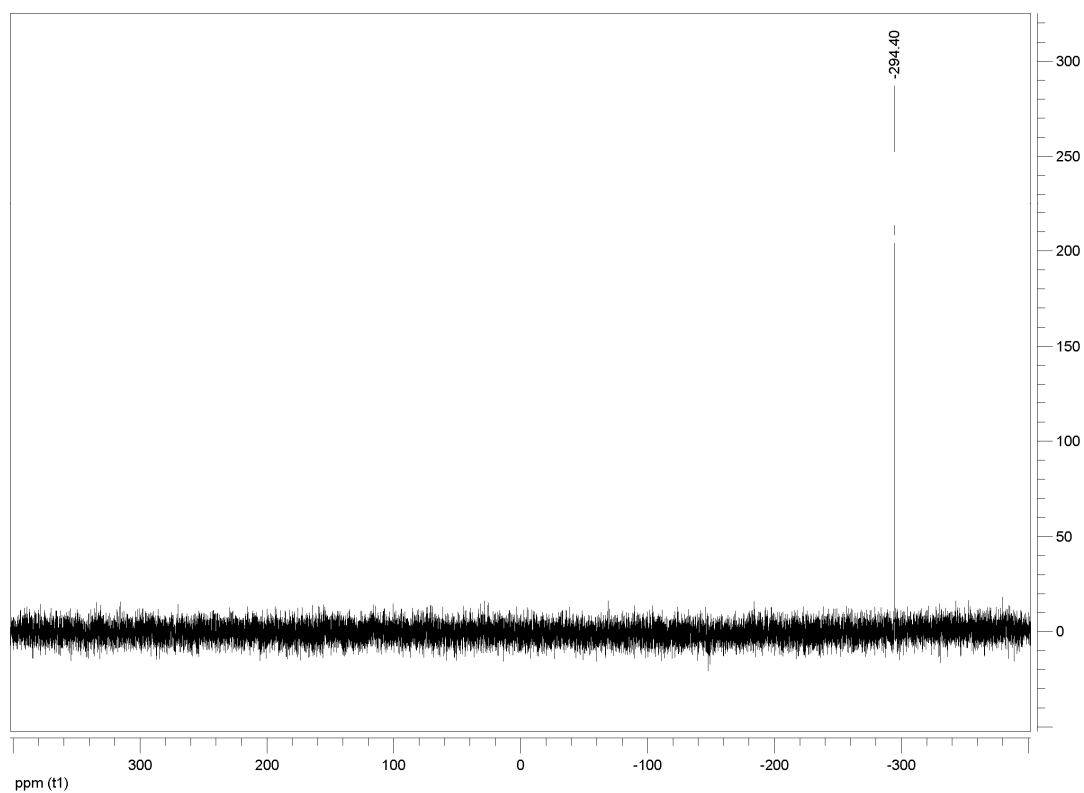

Figure S30 The  $^{119}\text{Sn}$  NMR spectra of **1a**

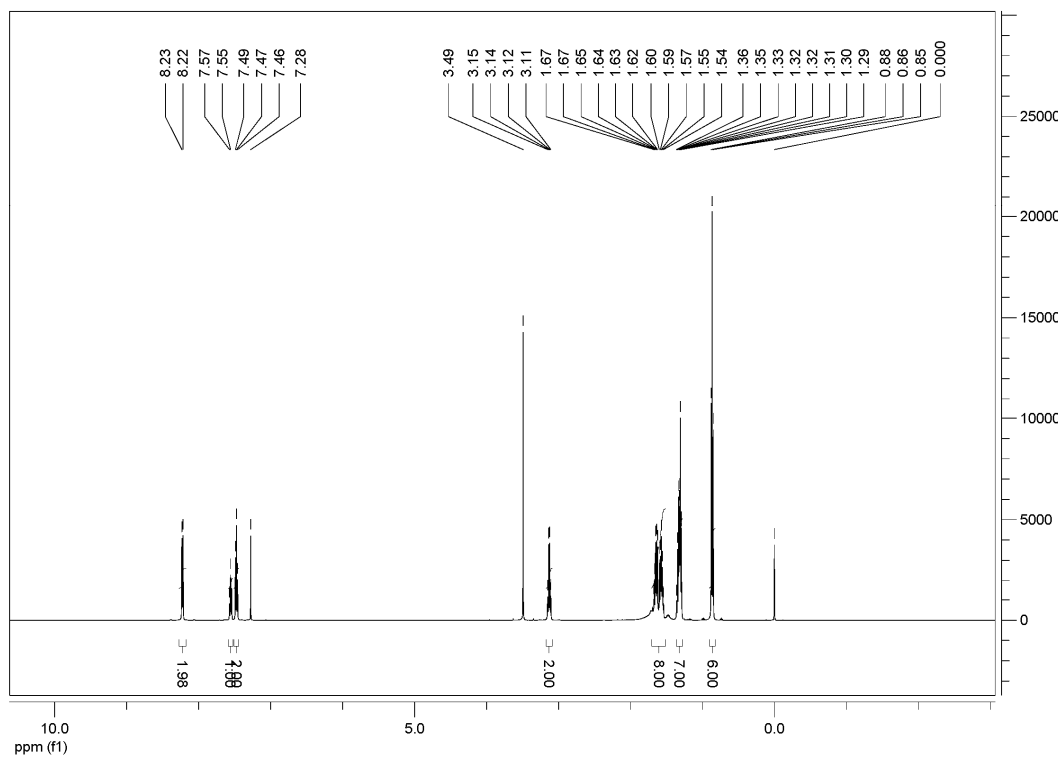

Figure S31 The  $^1\text{H}$  NMR spectra of **1b**



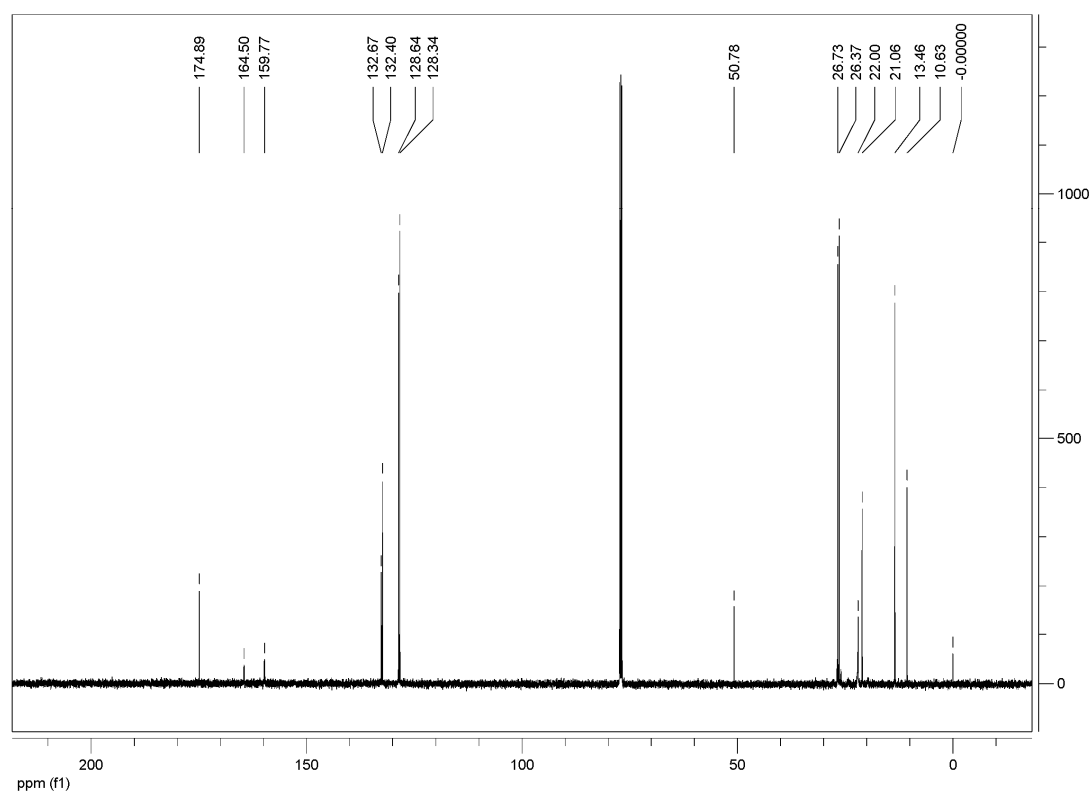

Figure S32 The <sup>13</sup>C NMR spectra of **1b**

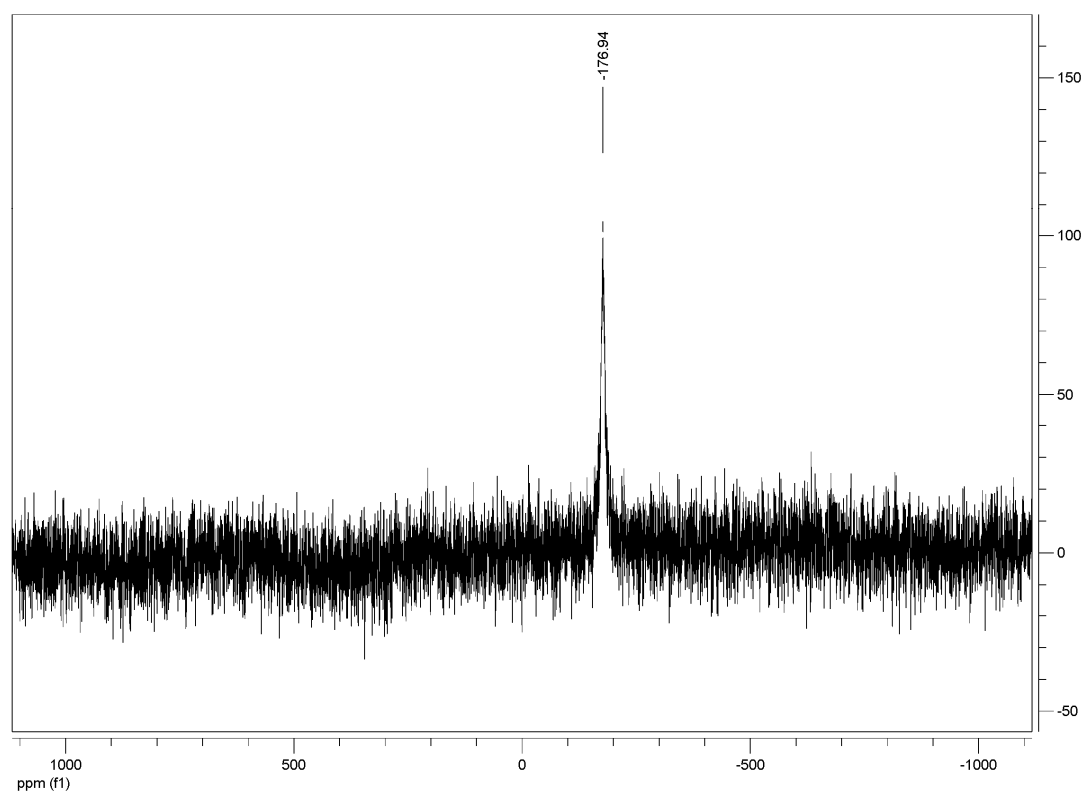

Figure S33 The <sup>119</sup>Sn NMR spectra of **1b**



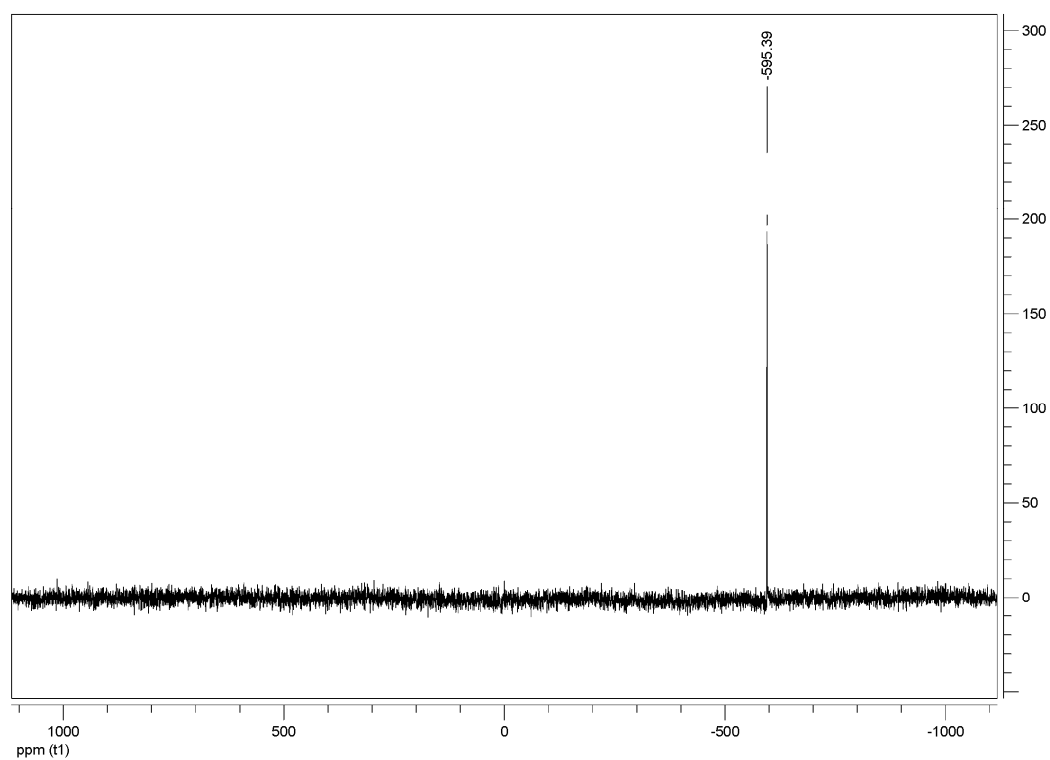

Figure S36 The  $^{119}\text{Sn}$  NMR spectra of **2a**

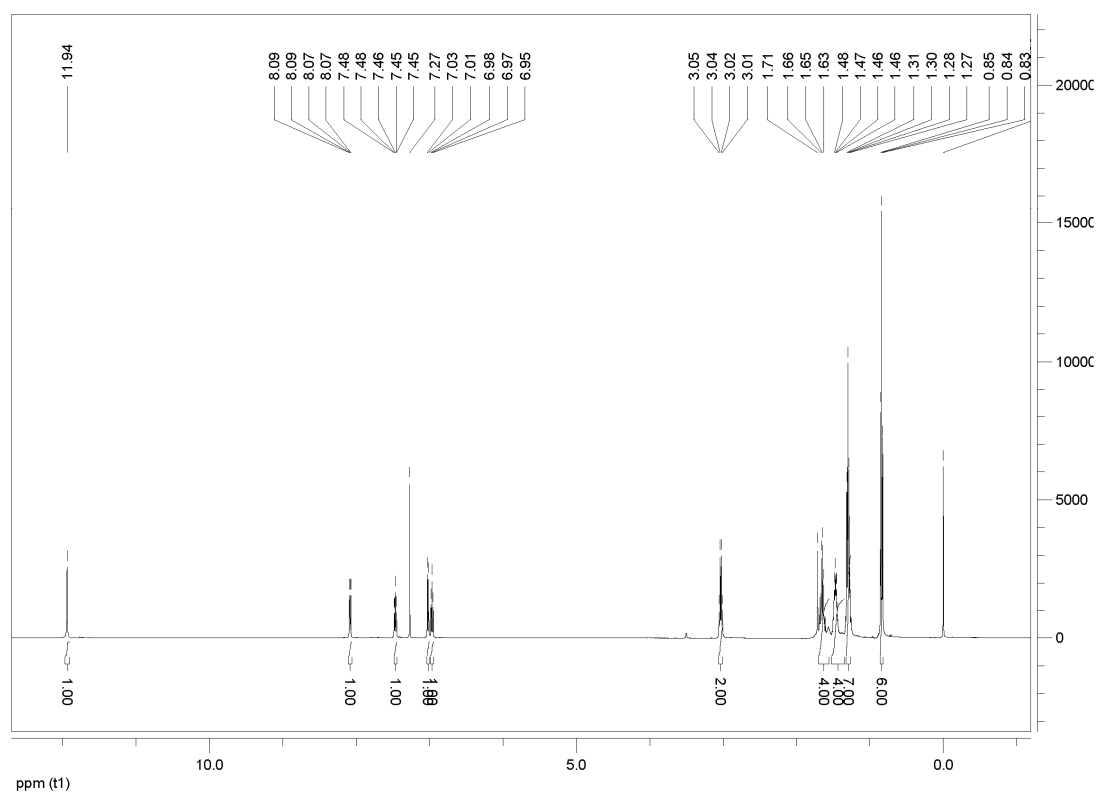

Figure S37 The  $^1\text{H}$  NMR spectra of **2b**

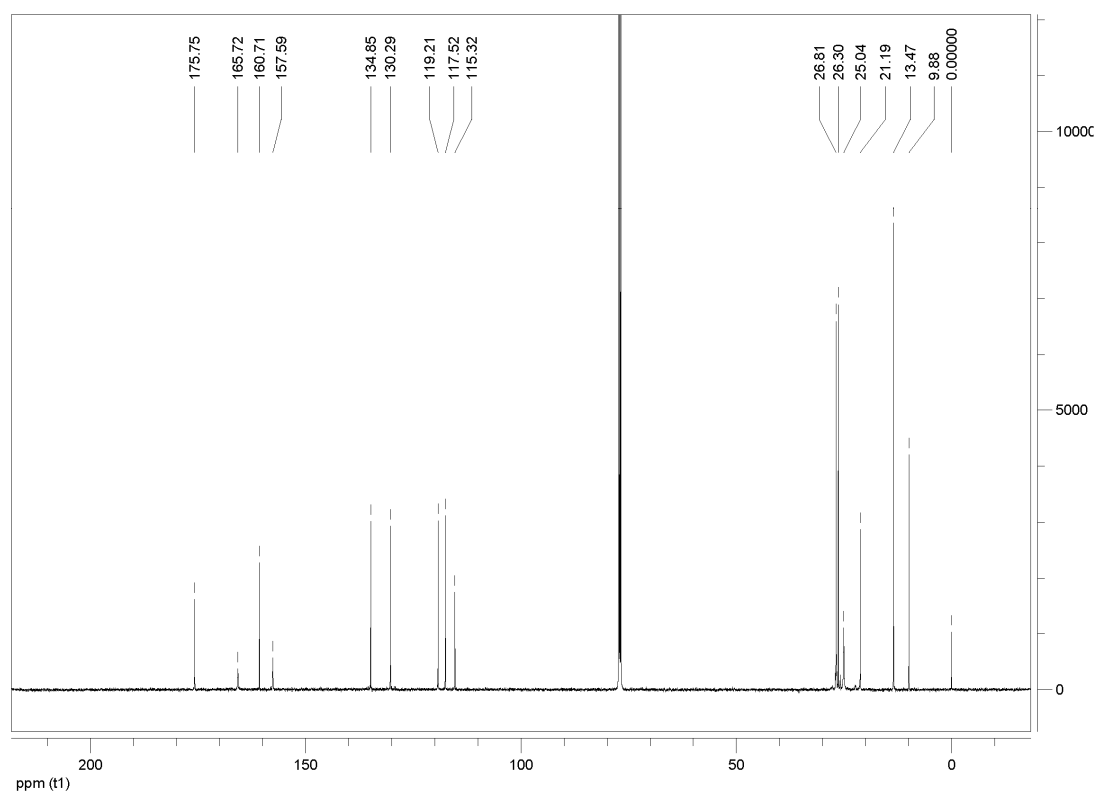

Figure S38 The <sup>13</sup>C NMR spectra of **2b**

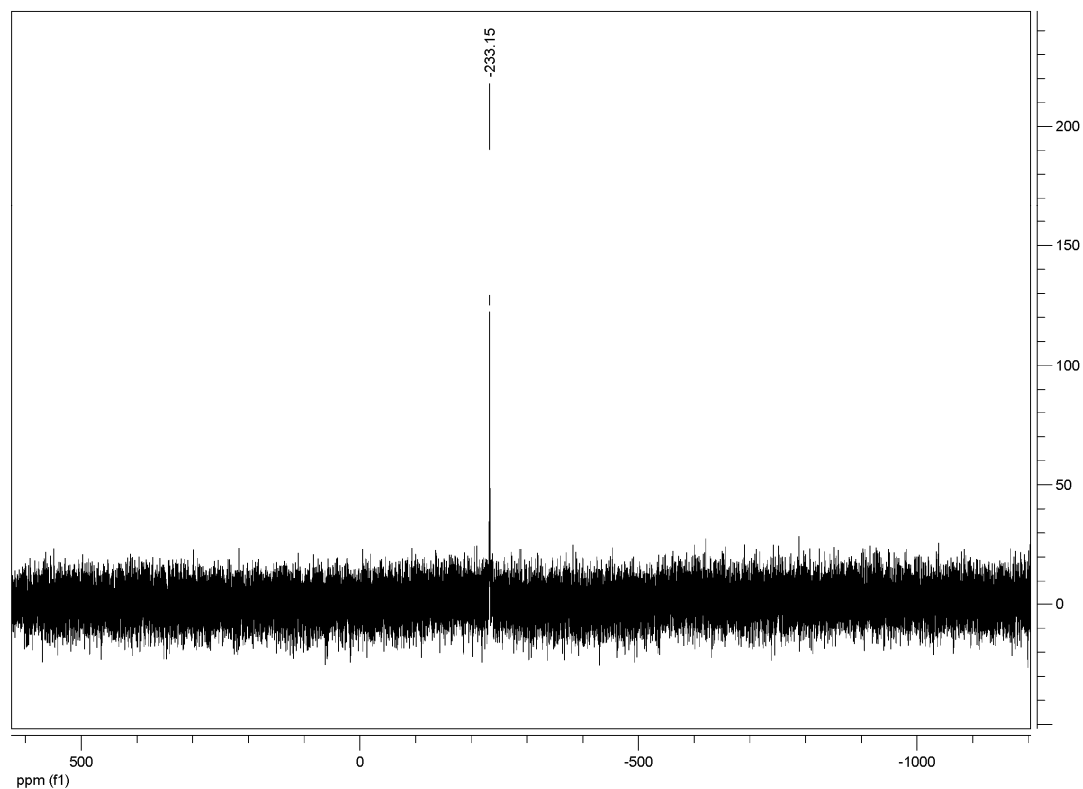

Figure S39 The <sup>119</sup>Sn NMR spectra of **2b**

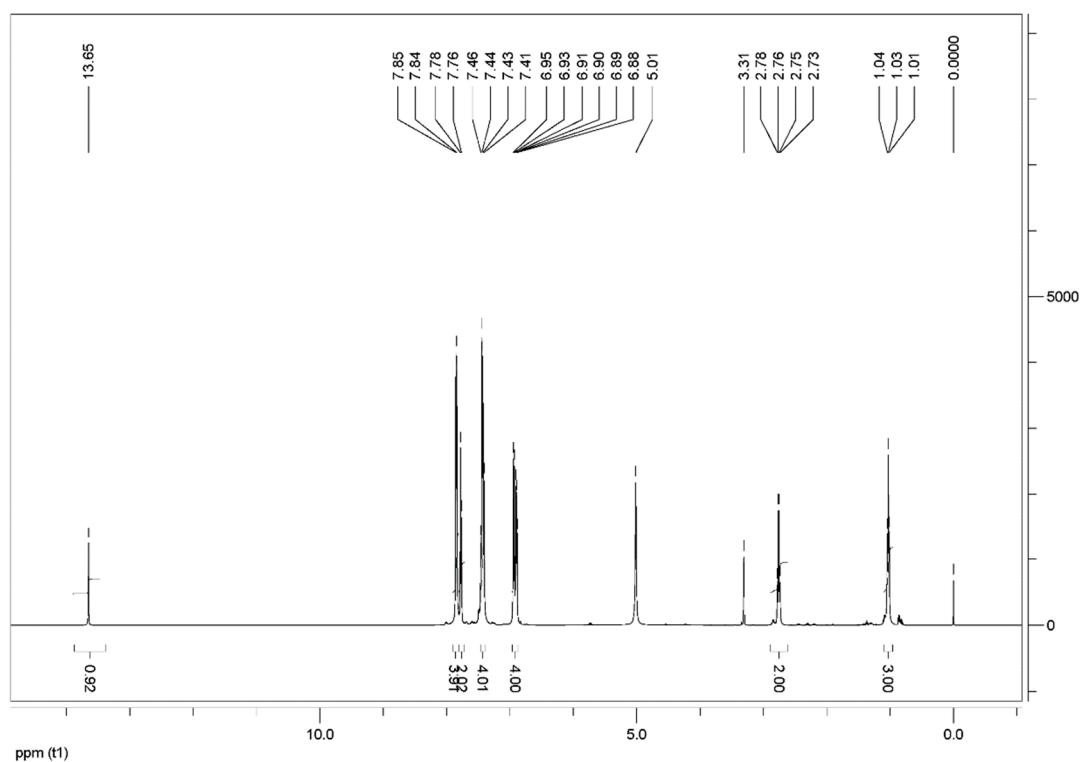

Figure S40 The <sup>1</sup>H NMR spectra of **3a**

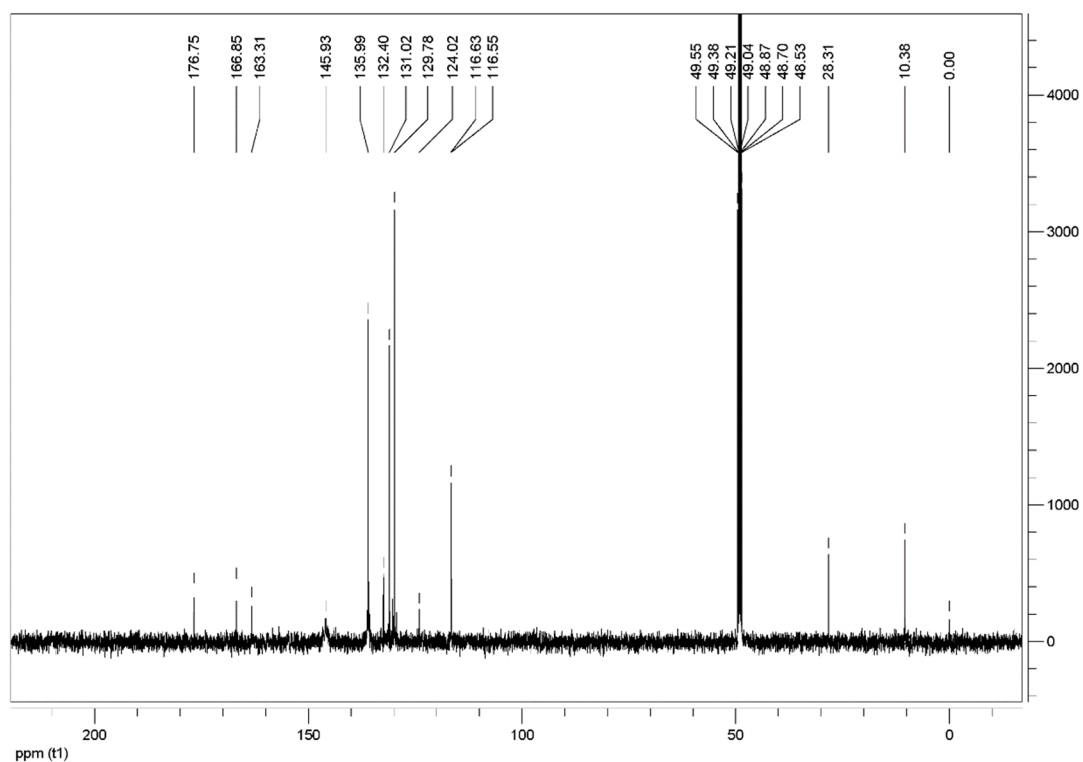

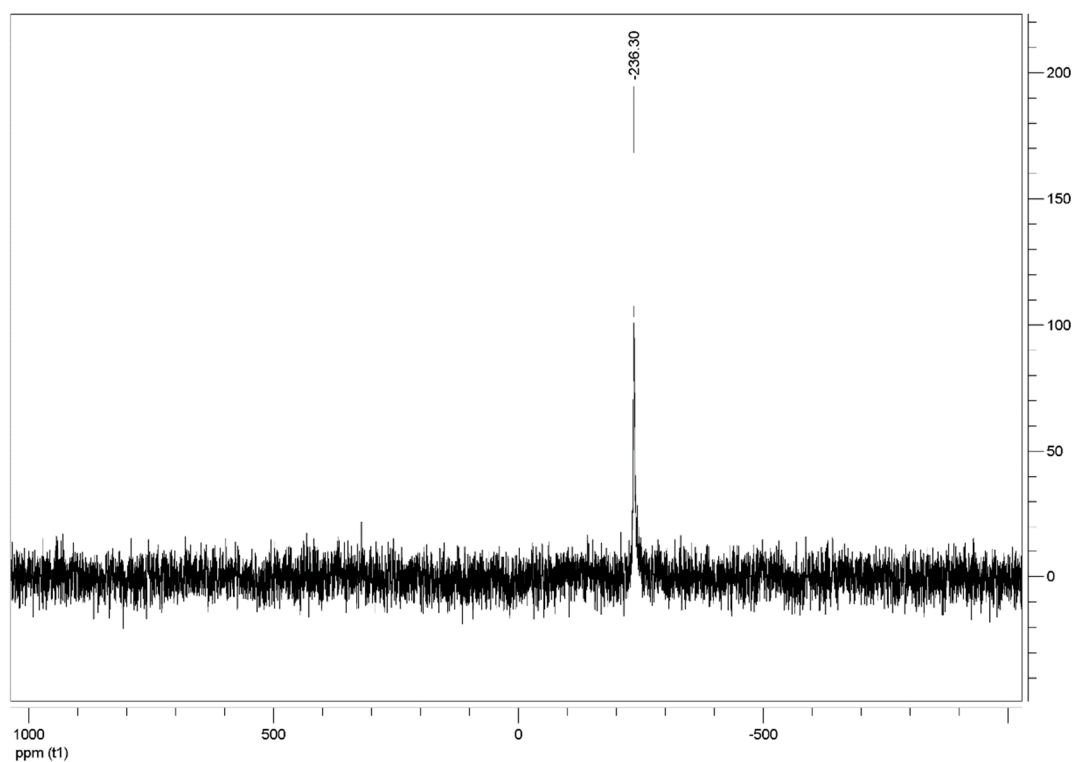

Figure S42 The  $^{119}\text{Sn}$  NMR spectra of **3a**

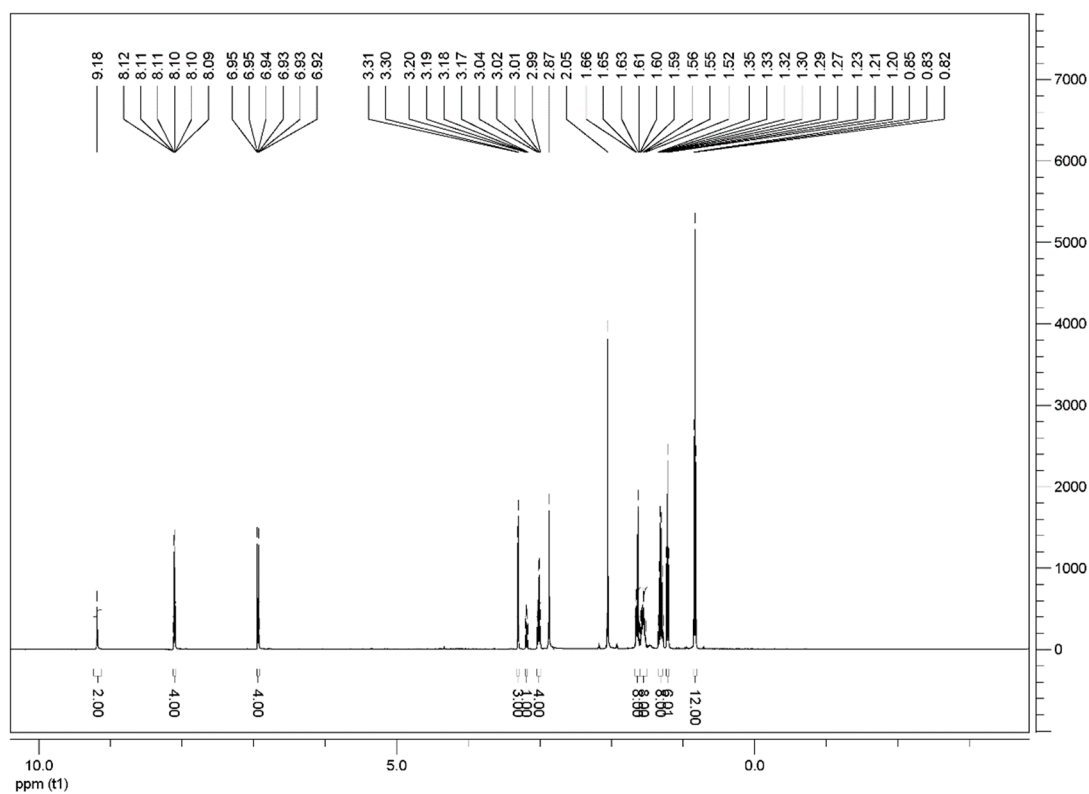

Figure S43 The  $^1\text{H}$  NMR spectra of **3b**

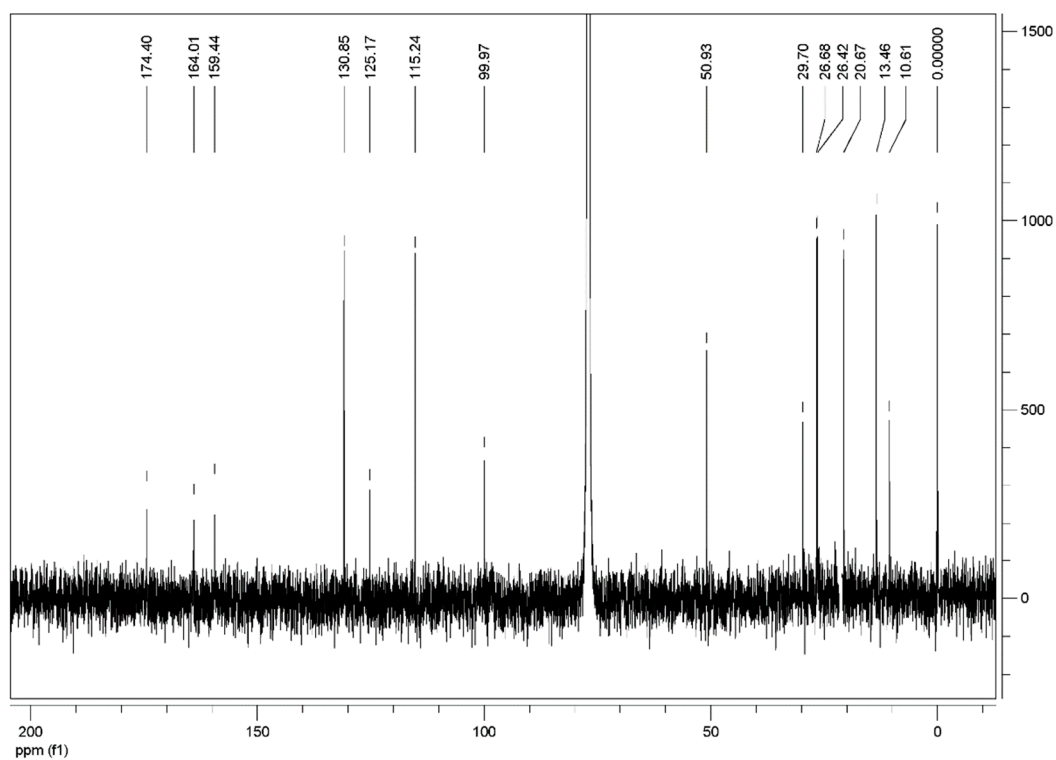

Figure S44 The  $^{13}\text{C}$  NMR spectra of **3b**

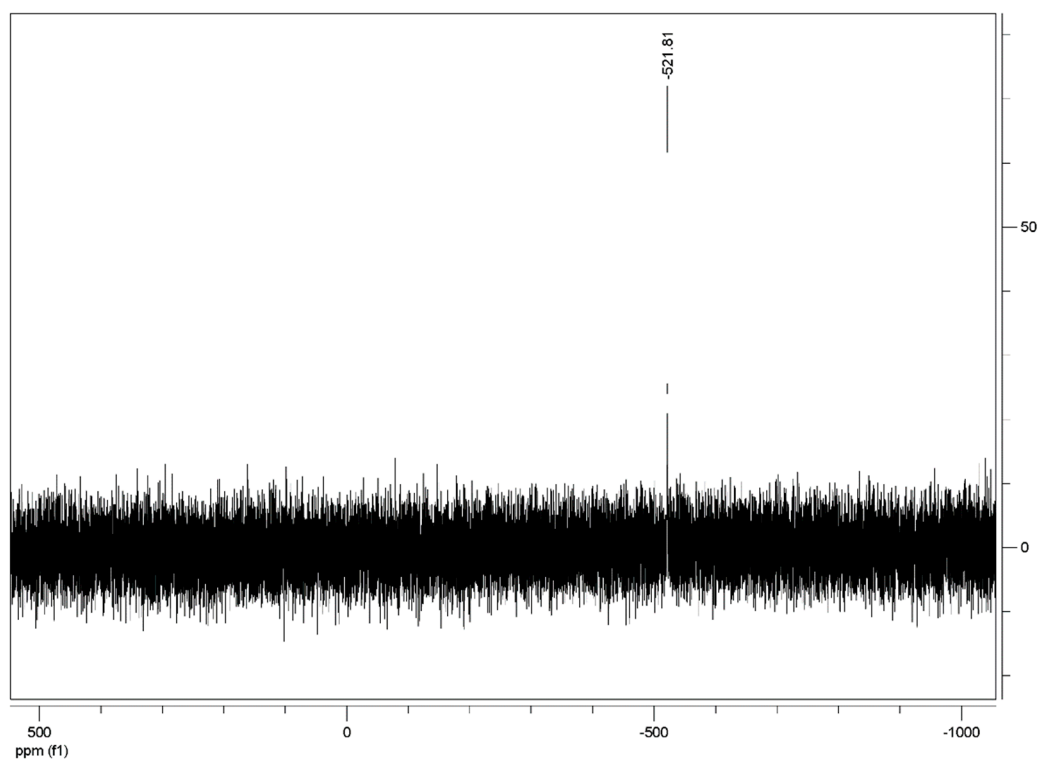

Figure S45 The  $^{119}\text{Sn}$  NMR spectra of **3b**

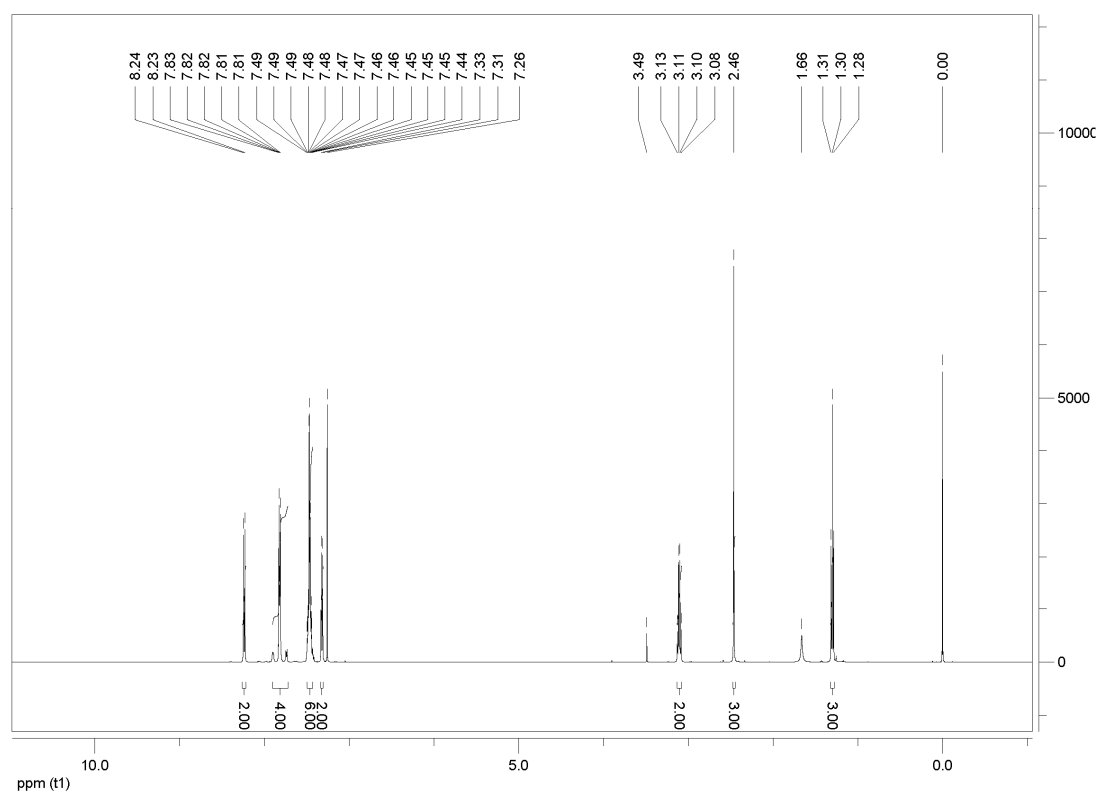

Figure S46 The <sup>1</sup>H NMR spectra of **4a**

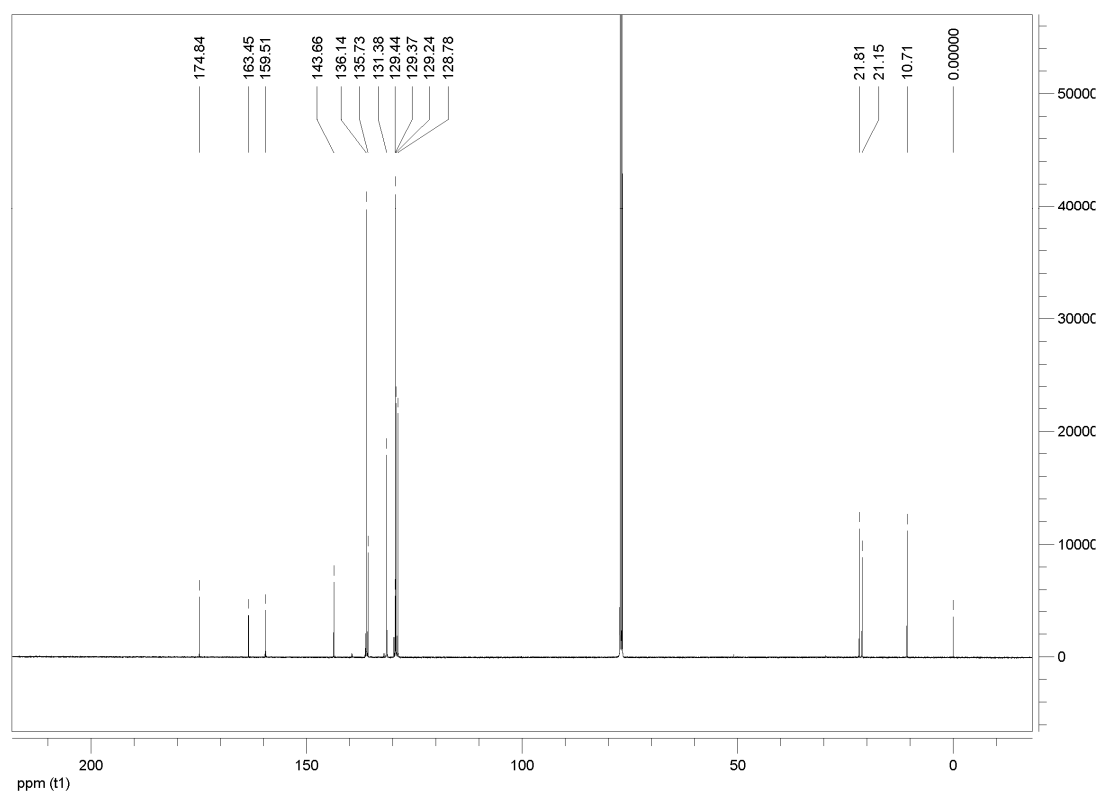

Figure S47 The <sup>13</sup>C NMR spectra of **4a**



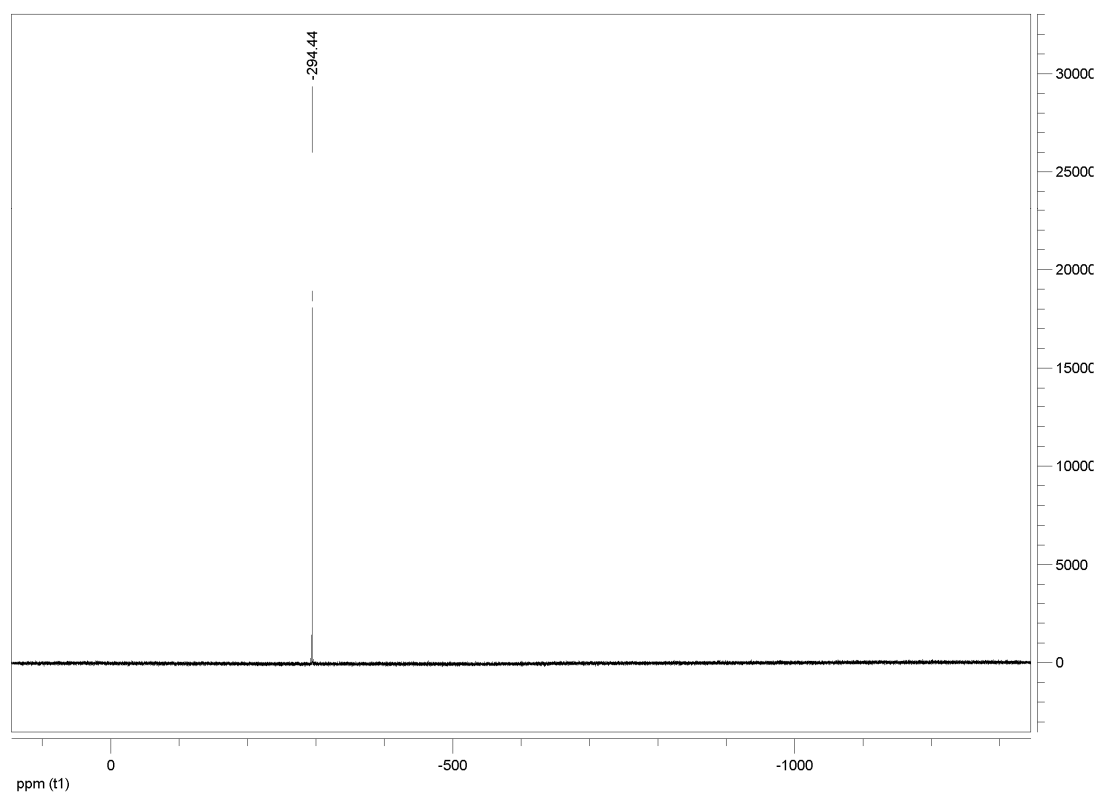

Figure S48 The  $^{119}\text{Sn}$  NMR spectra of **4a**

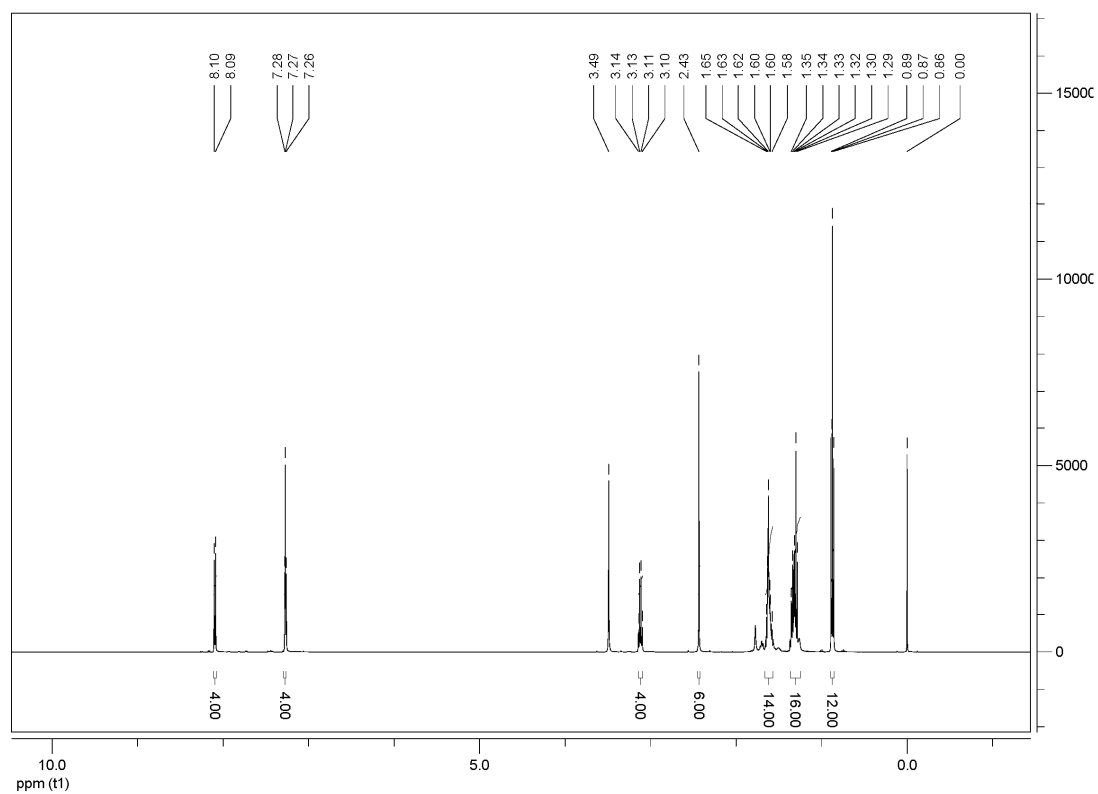

Figure S49 The  $^1\text{H}$  NMR spectra of **4b**

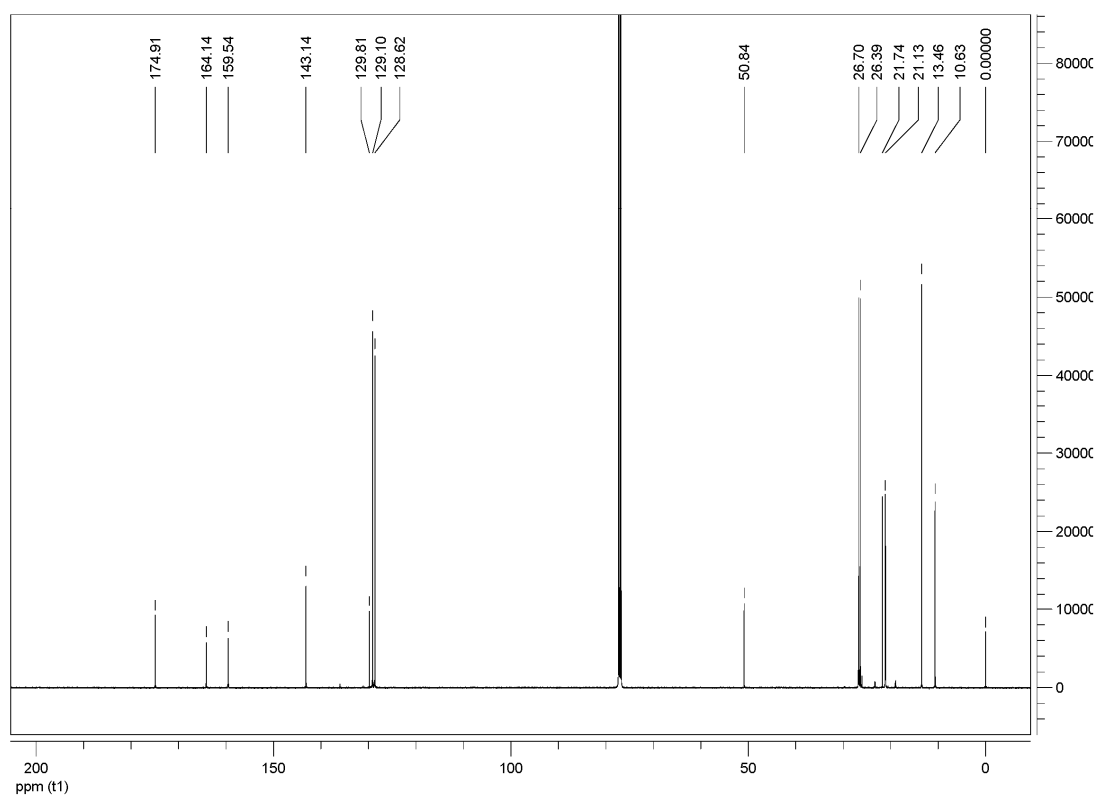

Figure S50 The  $^{13}\text{C}$  NMR spectra of **4b**

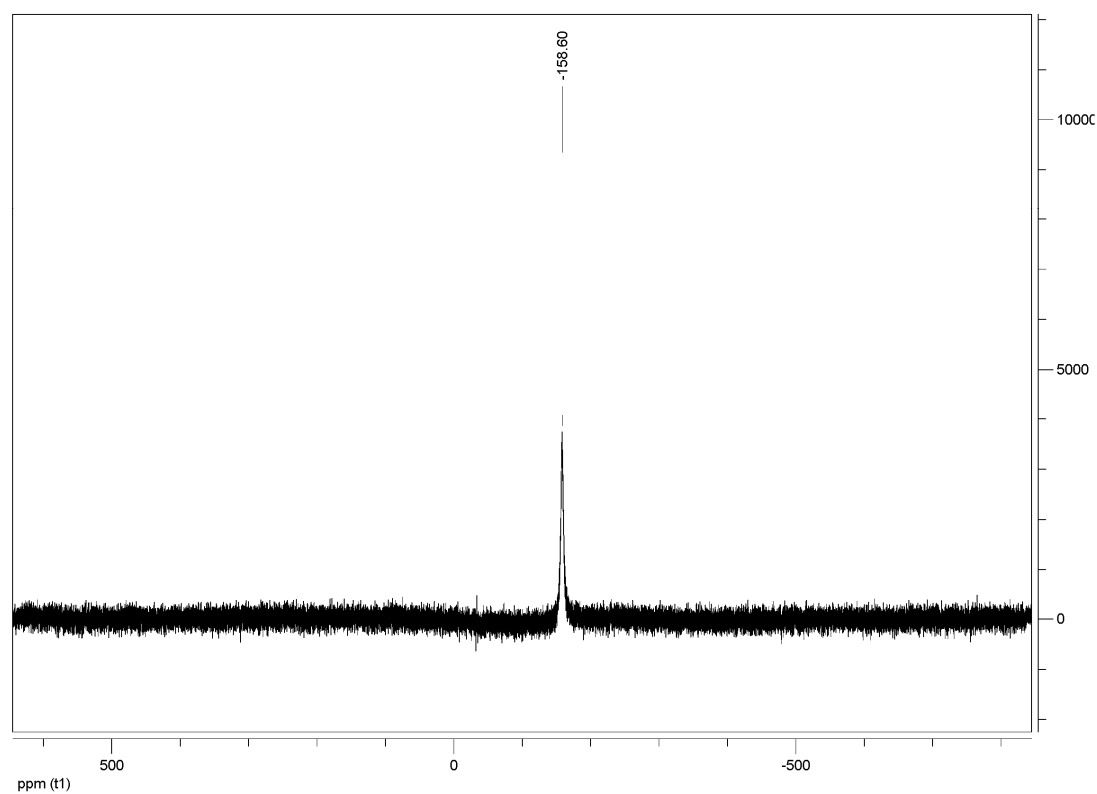

Figure S51 The  $^{119}\text{Sn}$  NMR spectra of **4b**

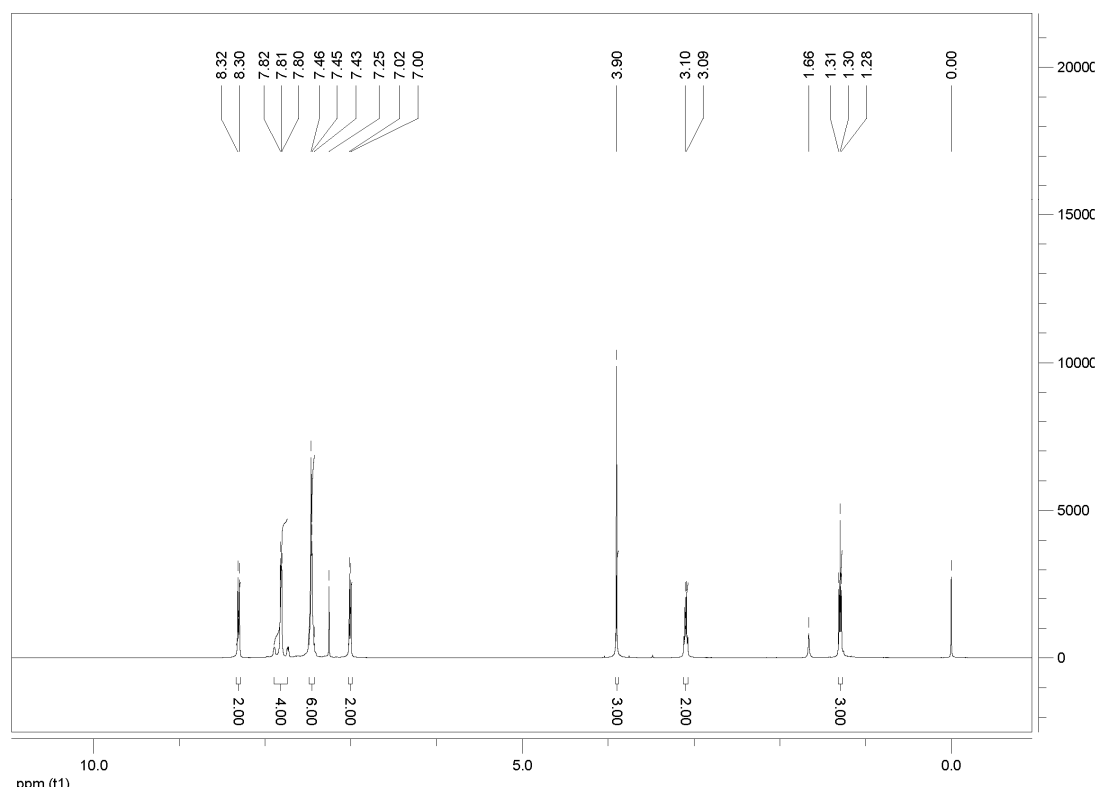

Figure S52 The <sup>1</sup>H NMR spectra of **5a**

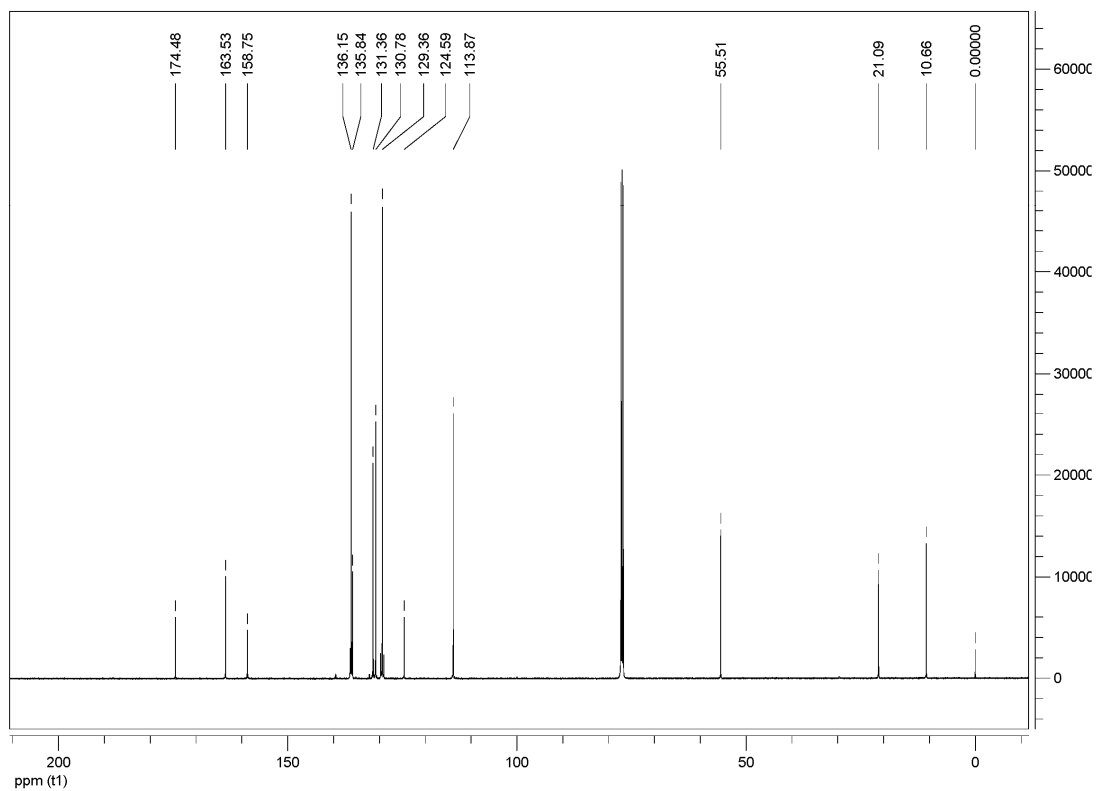

Figure S53 The <sup>13</sup>C NMR spectra of **5a**

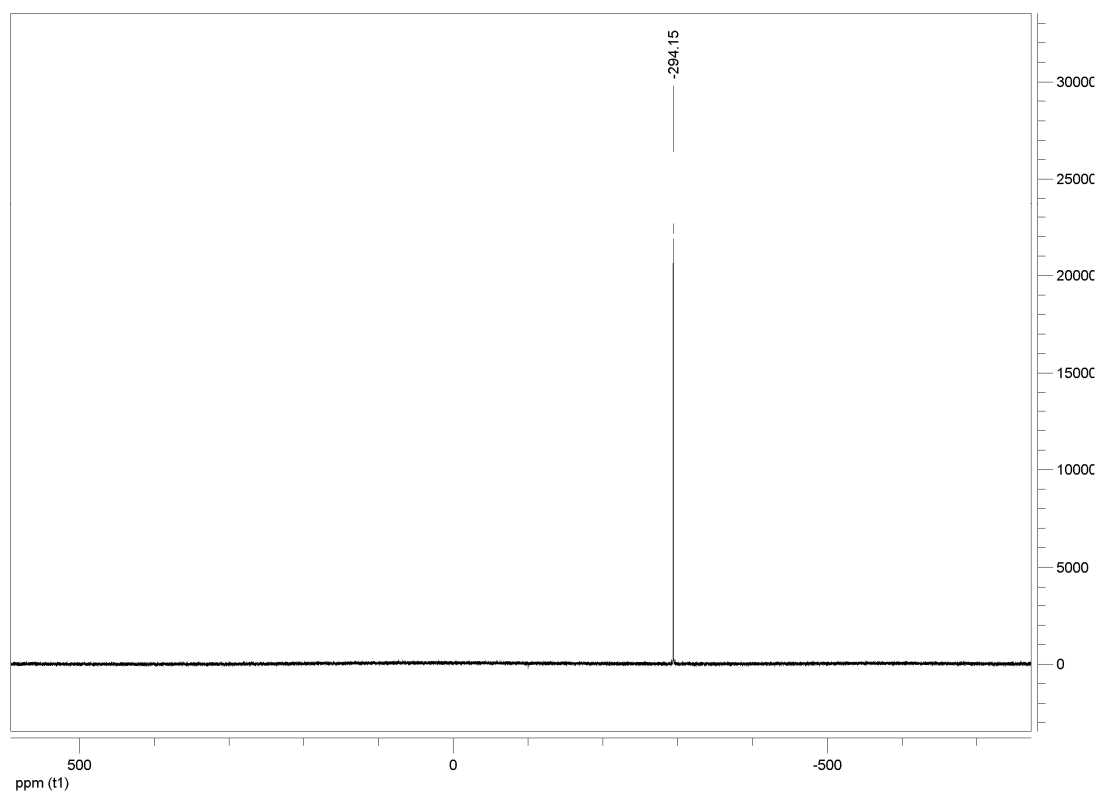

Figure S54 The  $^{119}\text{Sn}$  NMR spectra of **5a**

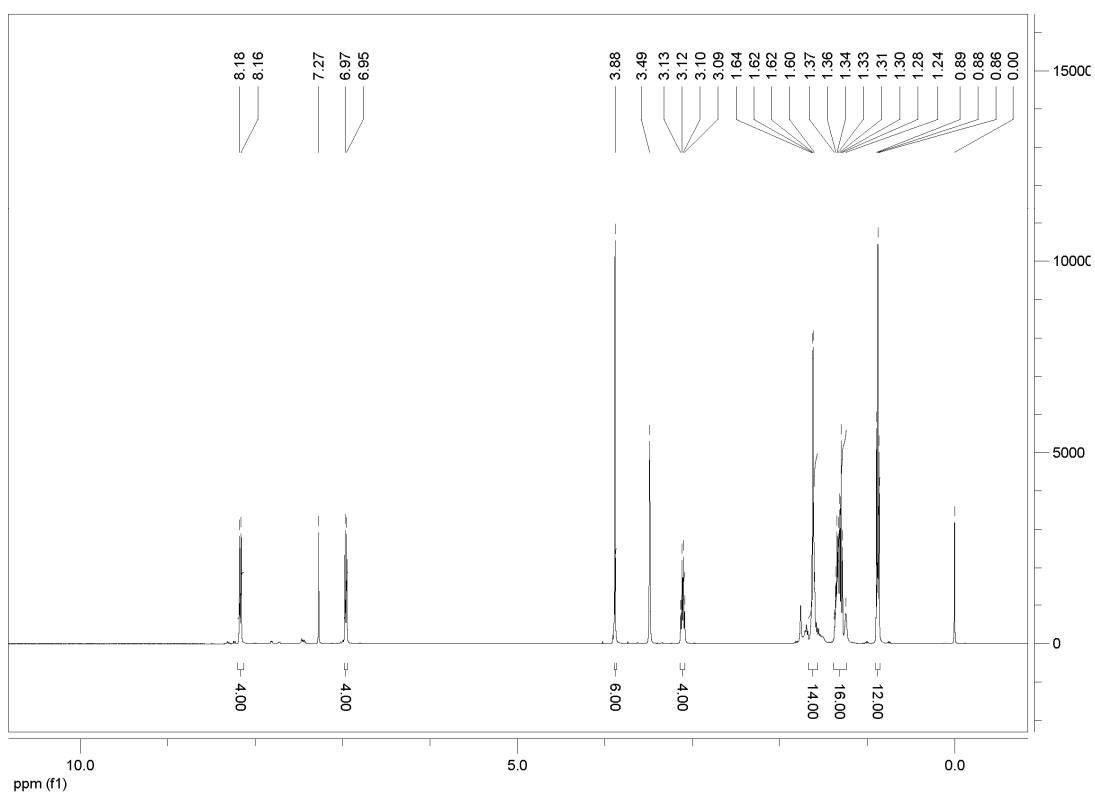

Figure S55 The  $^1\text{H}$  NMR spectra of **5b**

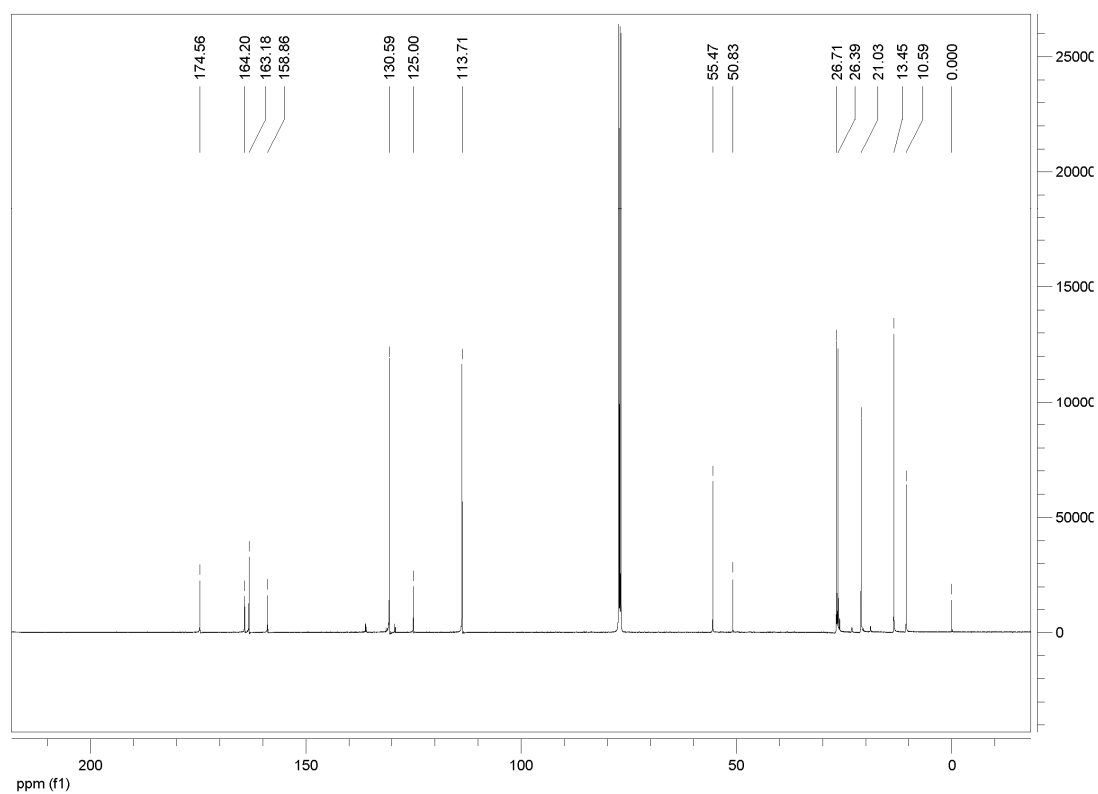

Figure S56 The <sup>13</sup>C NMR spectra of **5b**

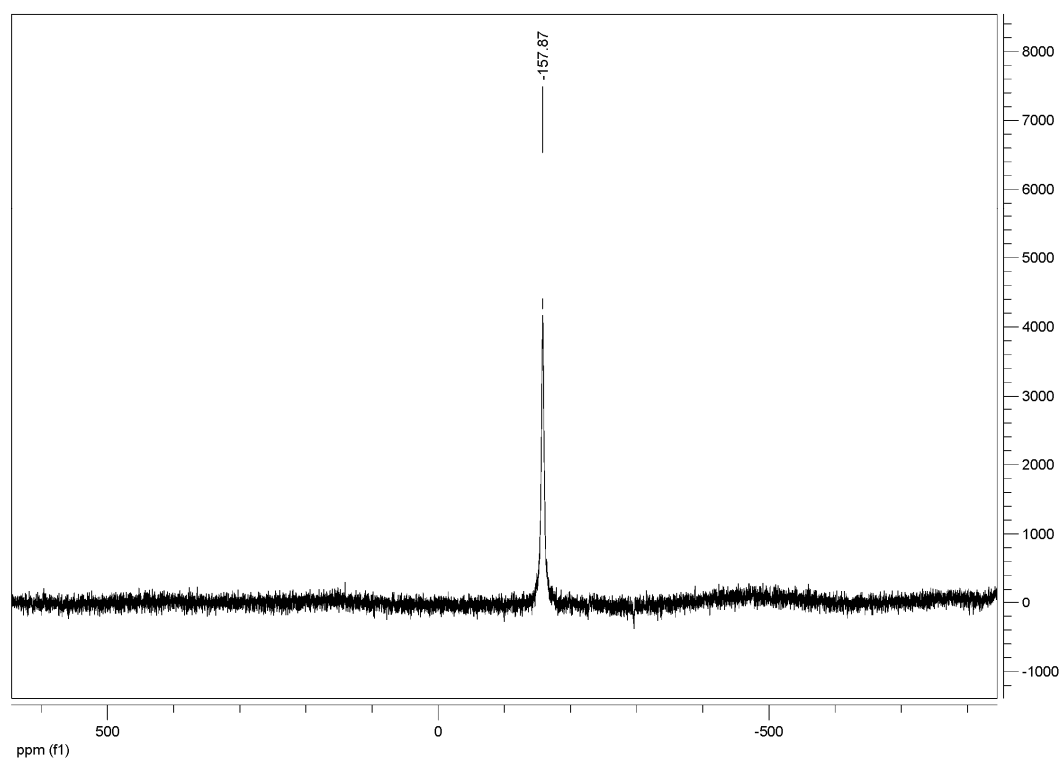

Figure S57 The <sup>119</sup>Sn NMR spectra of **5b**

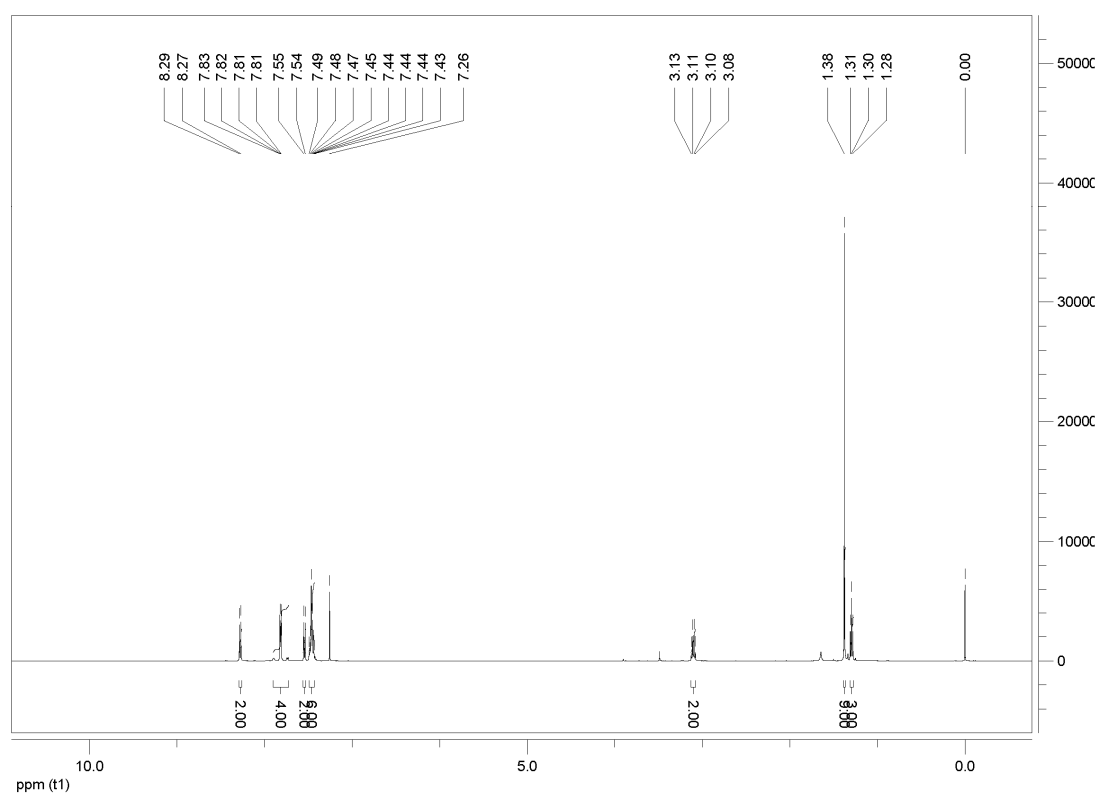

Figure S58 The <sup>1</sup>H NMR spectra of **6a**

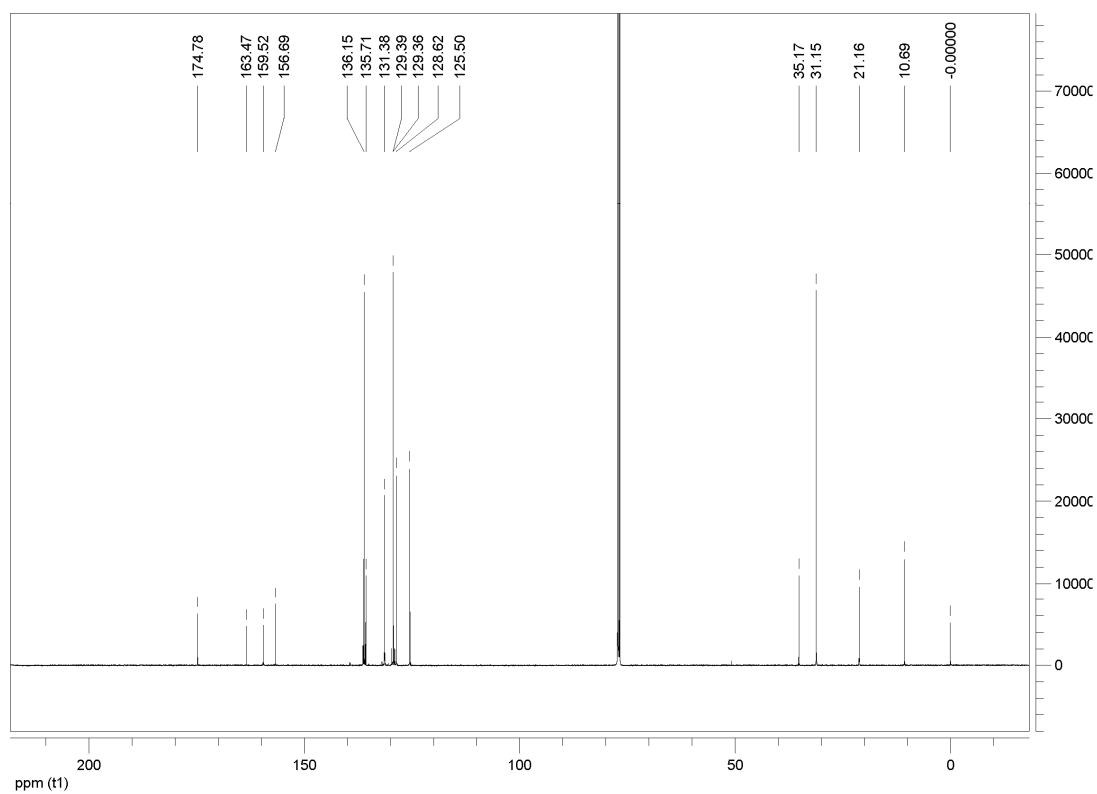

Figure S59 The <sup>13</sup>C NMR spectra of **6a**

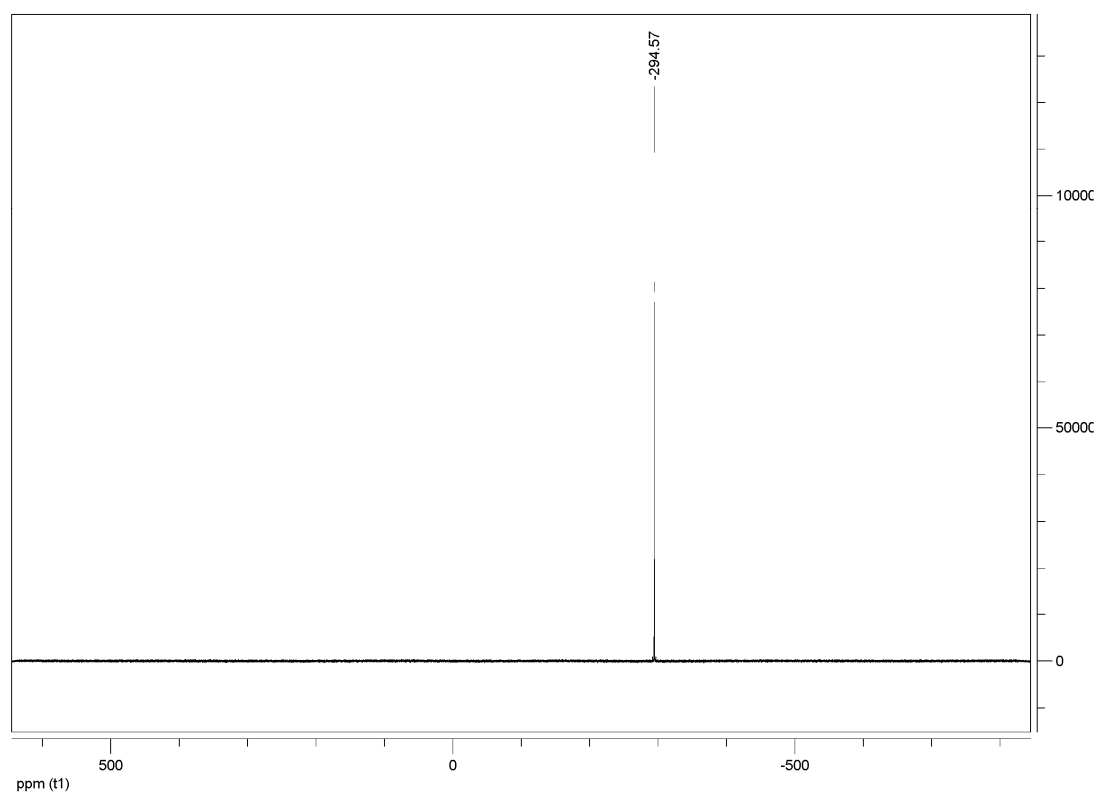

Figure S60 The  $^{119}\text{Sn}$  NMR spectra of **6a**

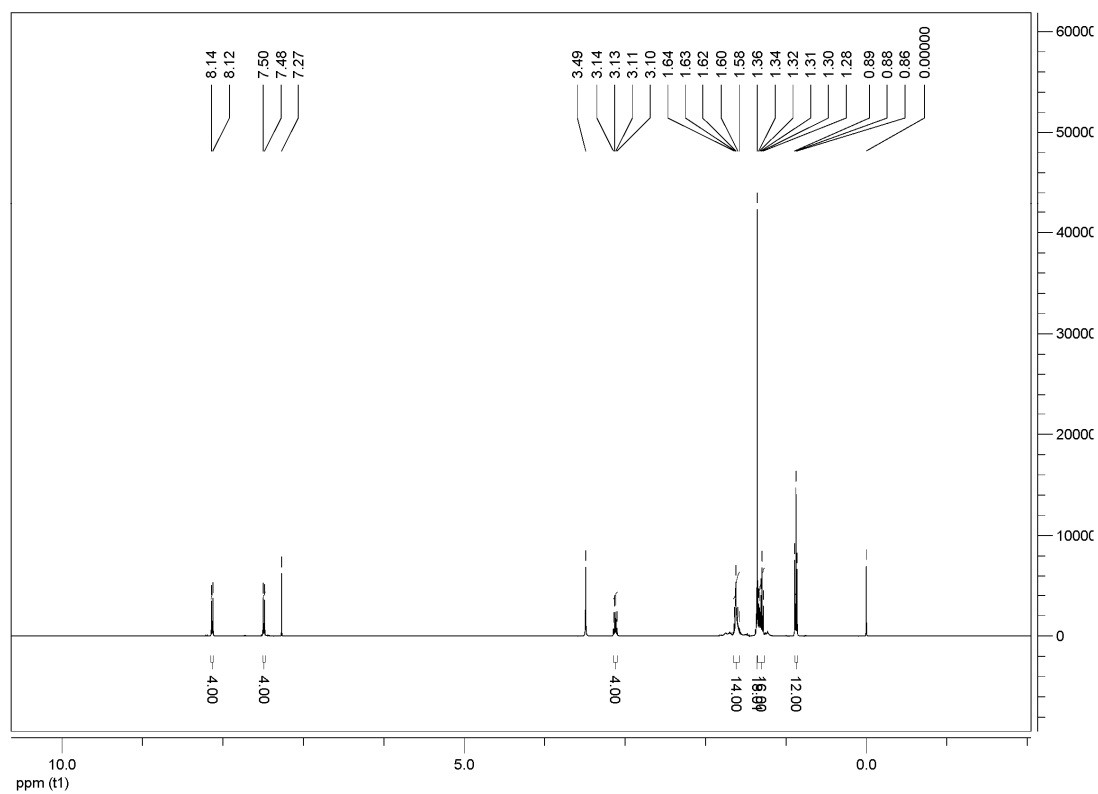

Figure S61 The  $^1\text{H}$  NMR spectra of **6b**

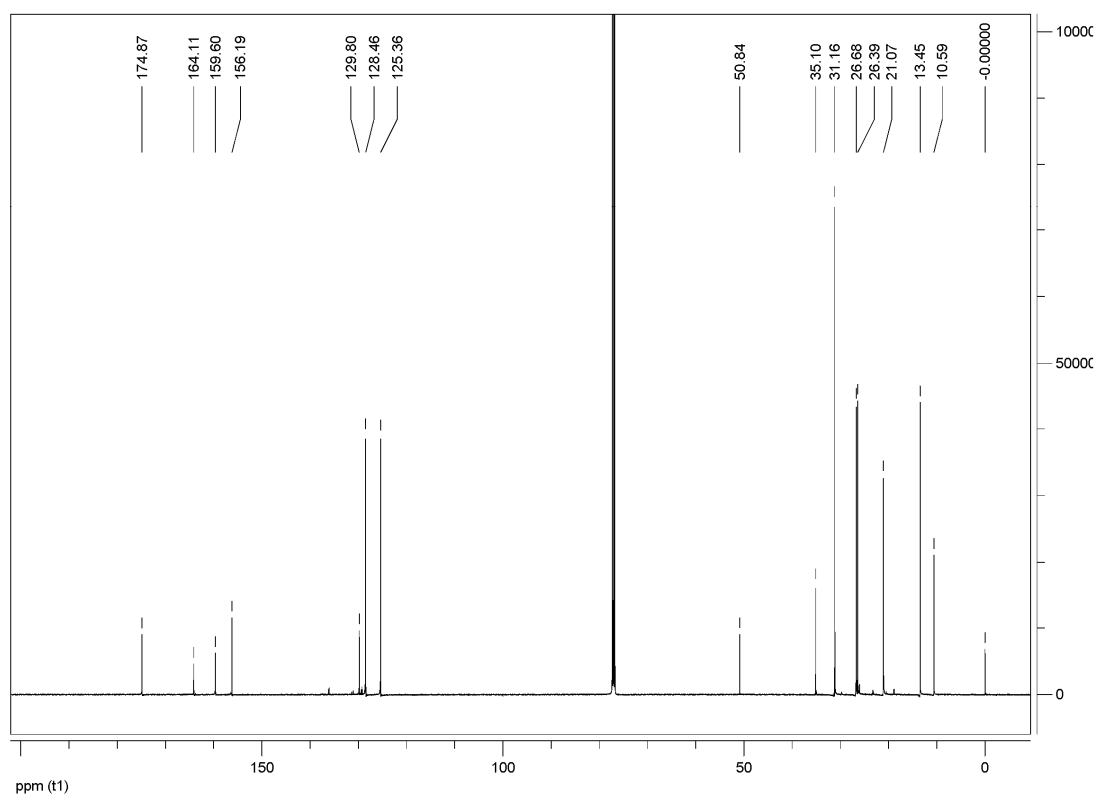

Figure S62 The  $^{13}\text{C}$  NMR spectra of **6b**

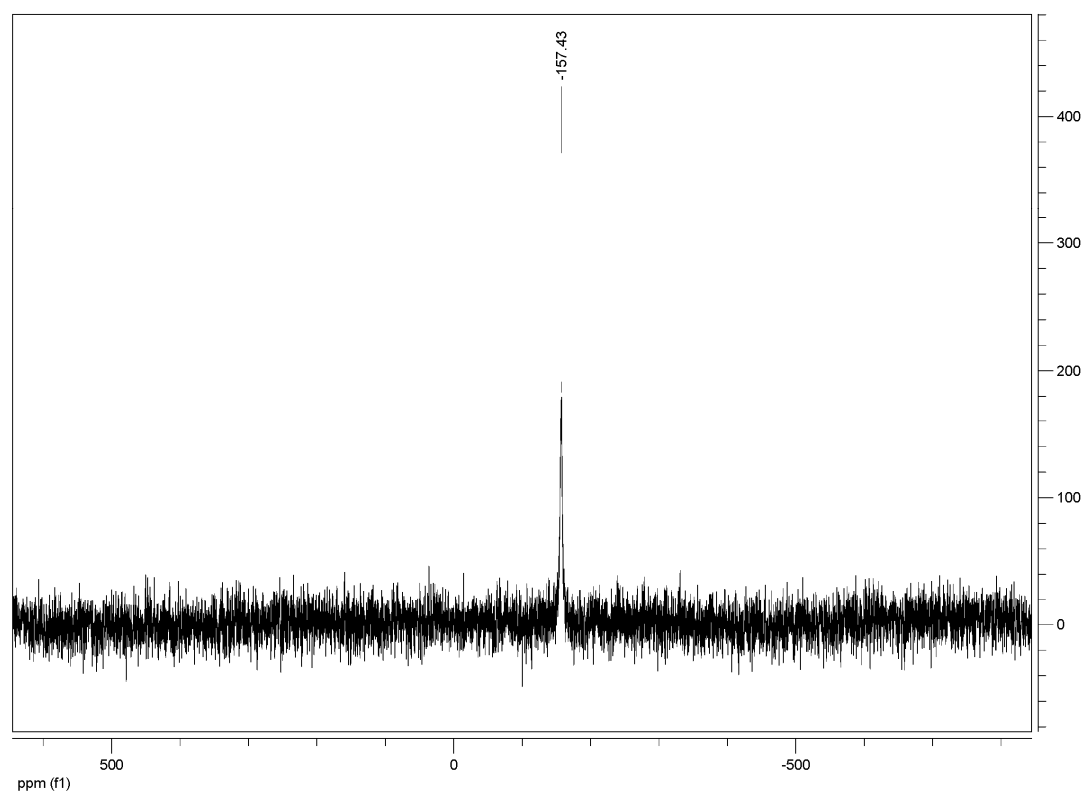

Figure S63 The  $^{119}\text{Sn}$  NMR spectra of **6b**



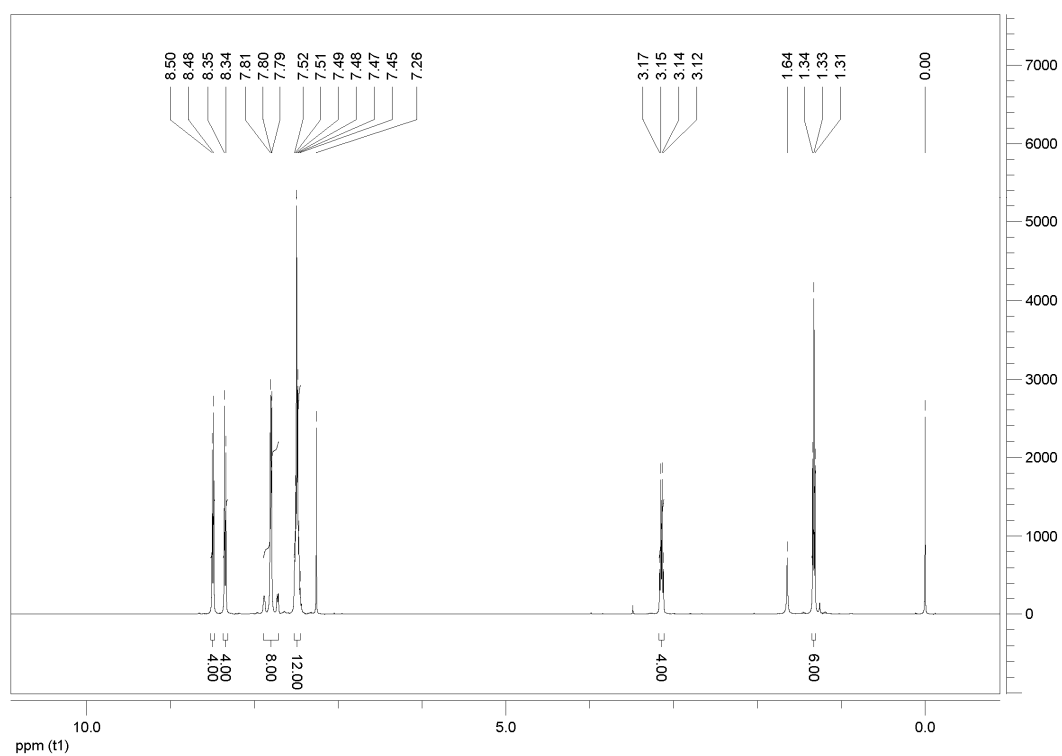

Figure S64 The <sup>1</sup>H NMR spectra of **7a**

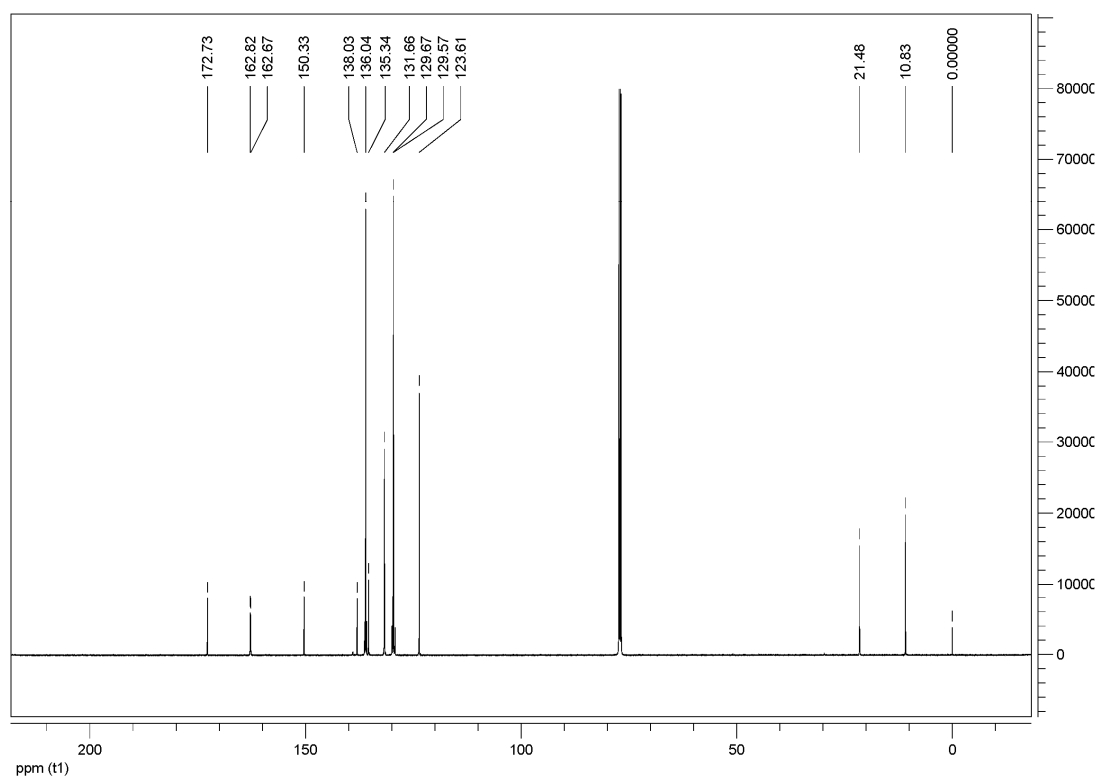

Figure S65 The <sup>13</sup>C NMR spectra of **7a**

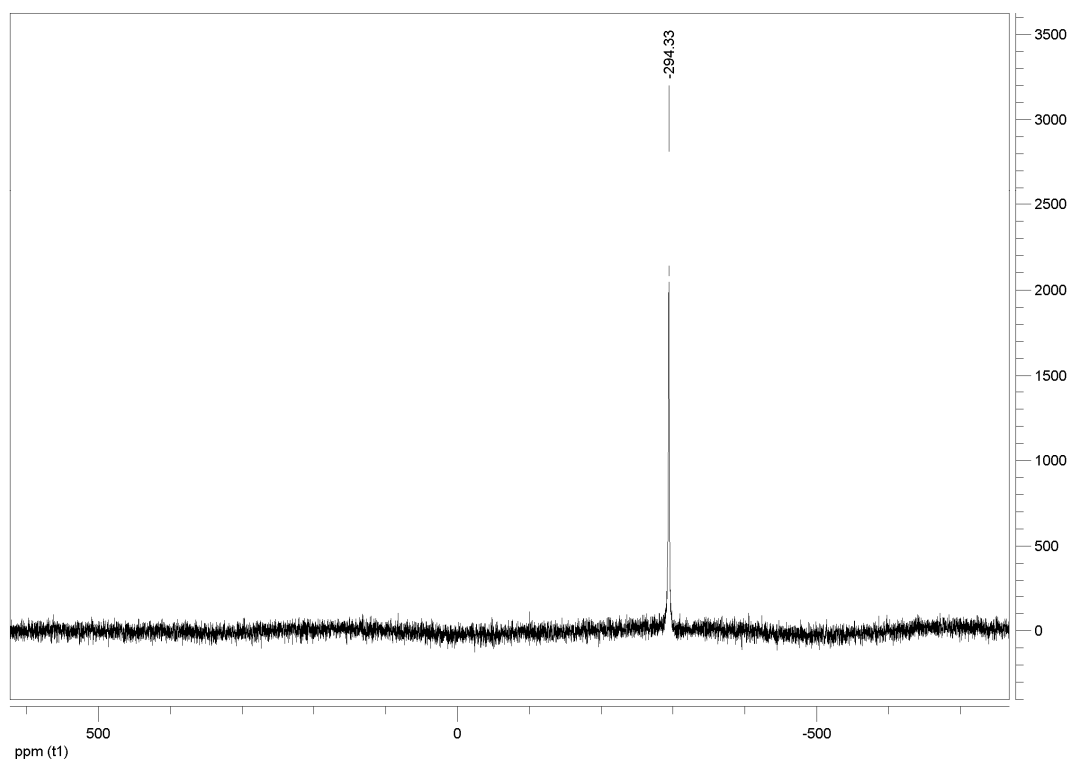

Figure S66 The  $^{119}\text{Sn}$  NMR spectra of **7a**

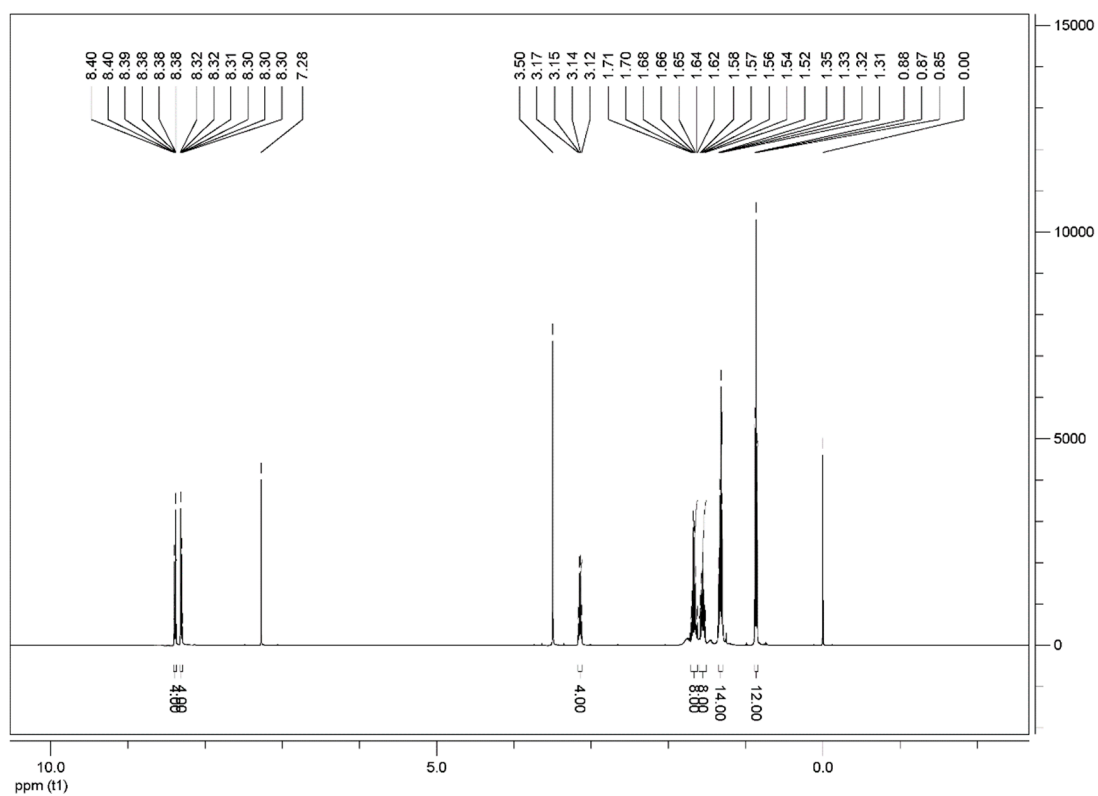

Figure S67 The  $^1\text{H}$  NMR spectra of **7b**

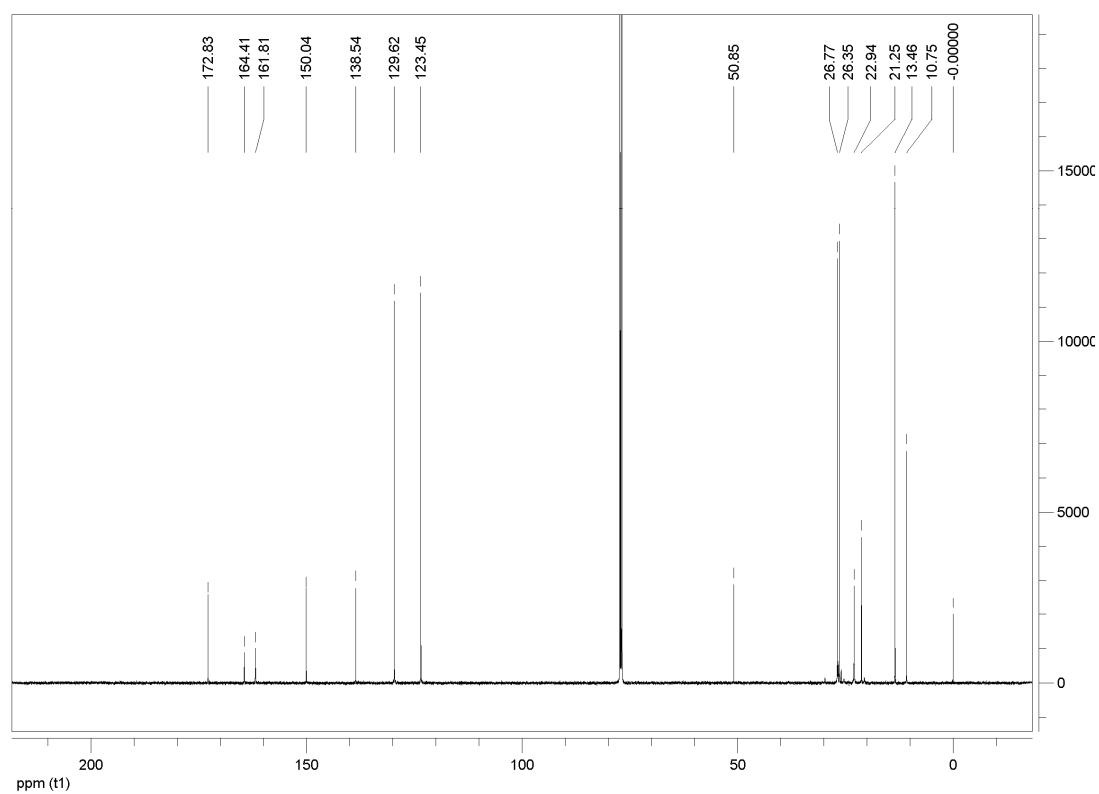

Figure S68 The  $^{13}\text{C}$  NMR spectra of **7b**

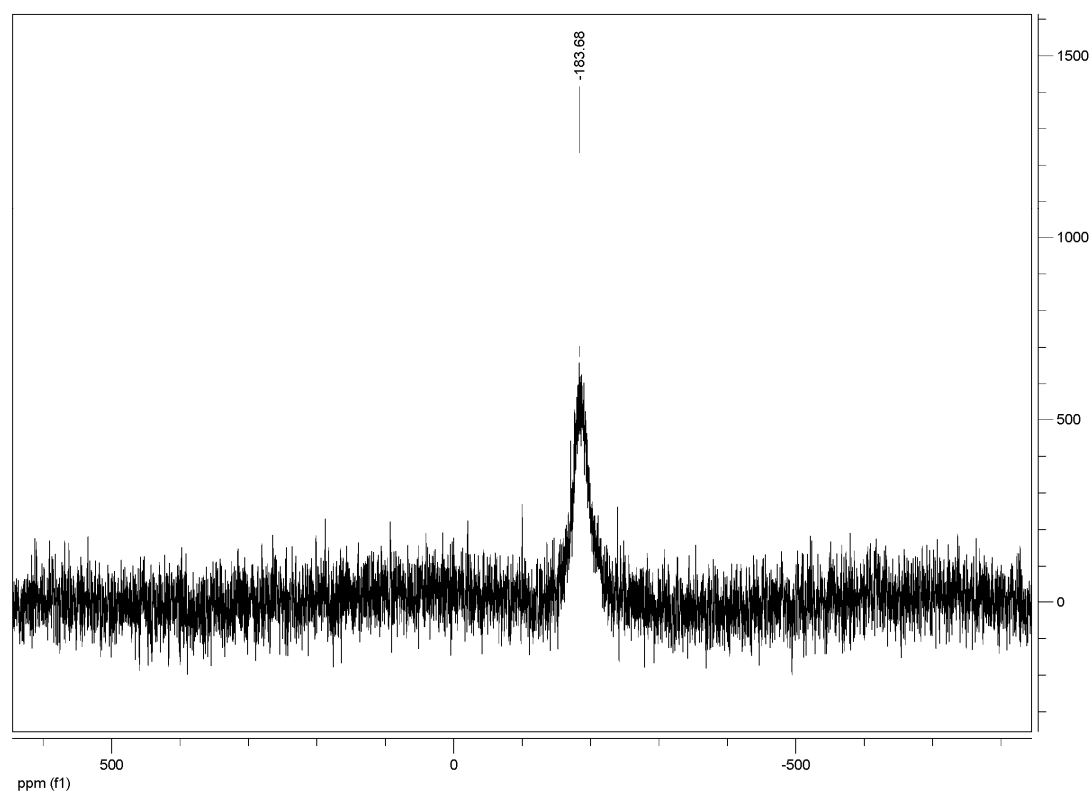

Figure S69 The  $^{119}\text{Sn}$  NMR spectra of **7b**

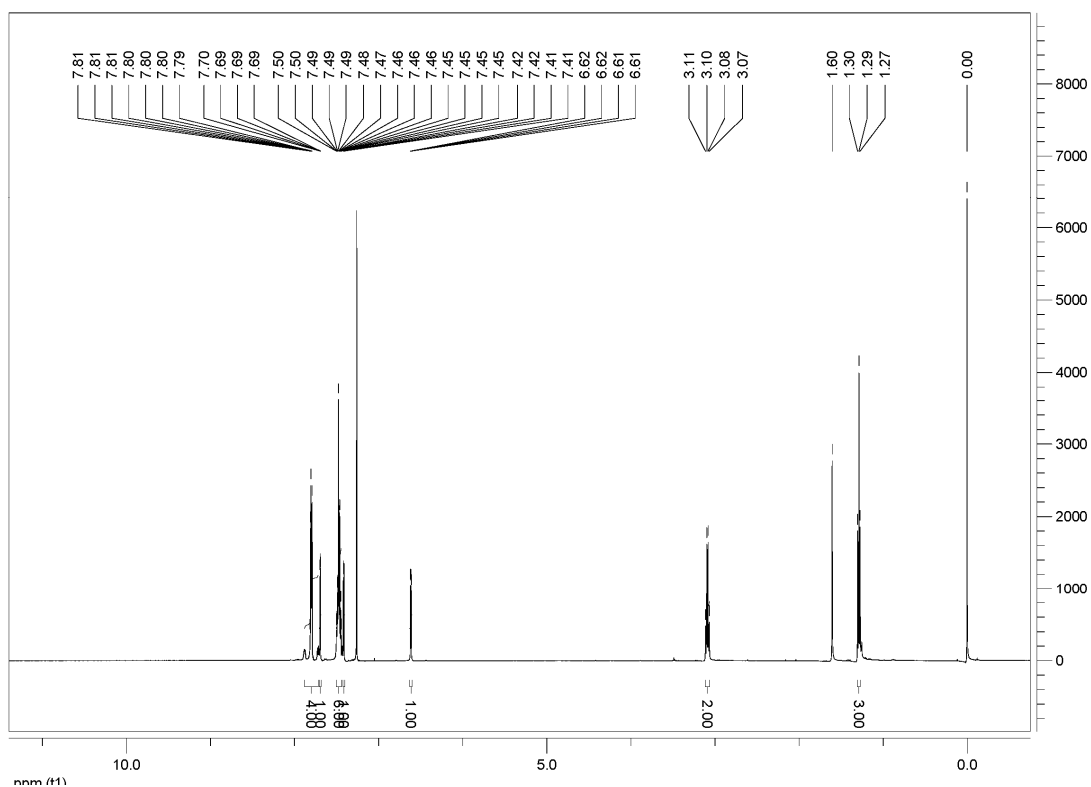

Figure S70 The <sup>1</sup>H NMR spectra of **8a**

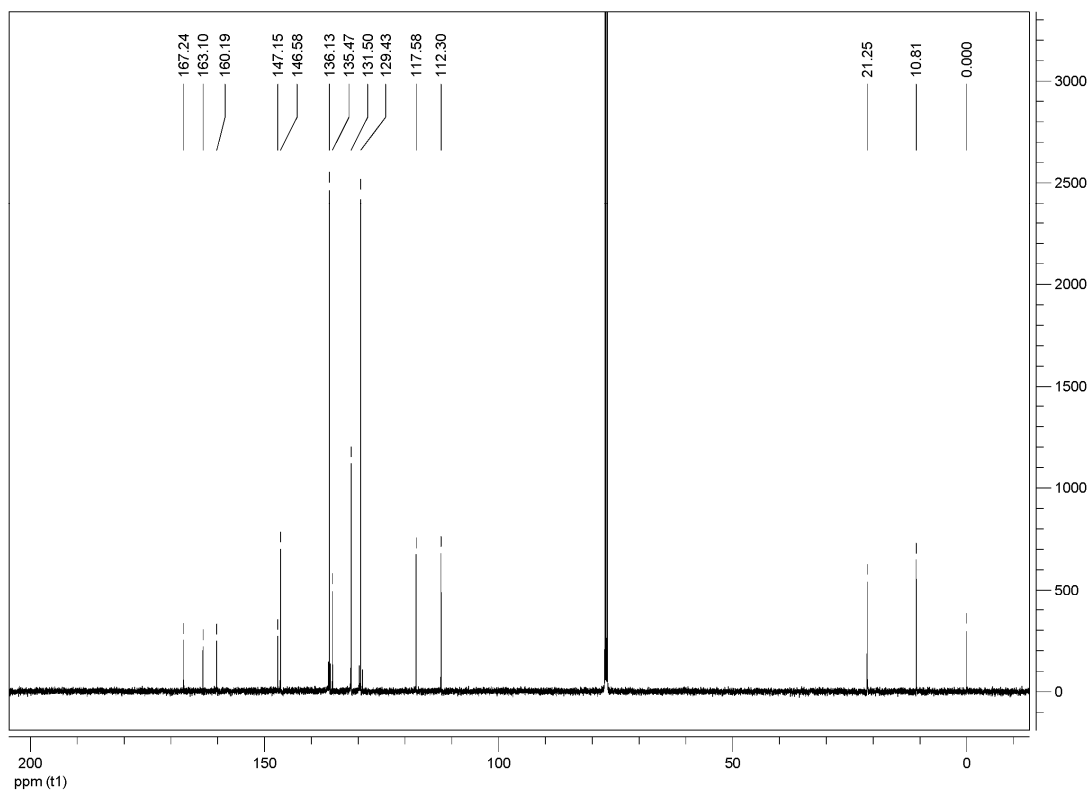

Figure S71 The <sup>13</sup>C NMR spectra of **8a**

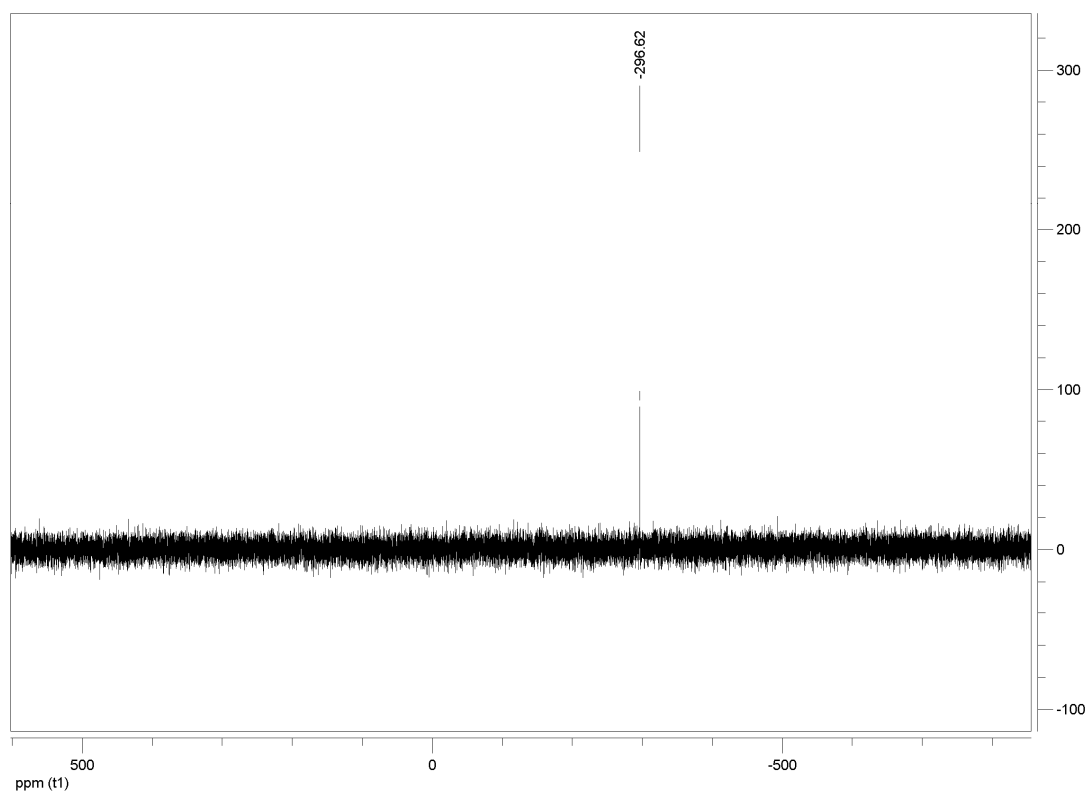

Figure S72 The  $^{119}\text{Sn}$  NMR spectra of **8a**

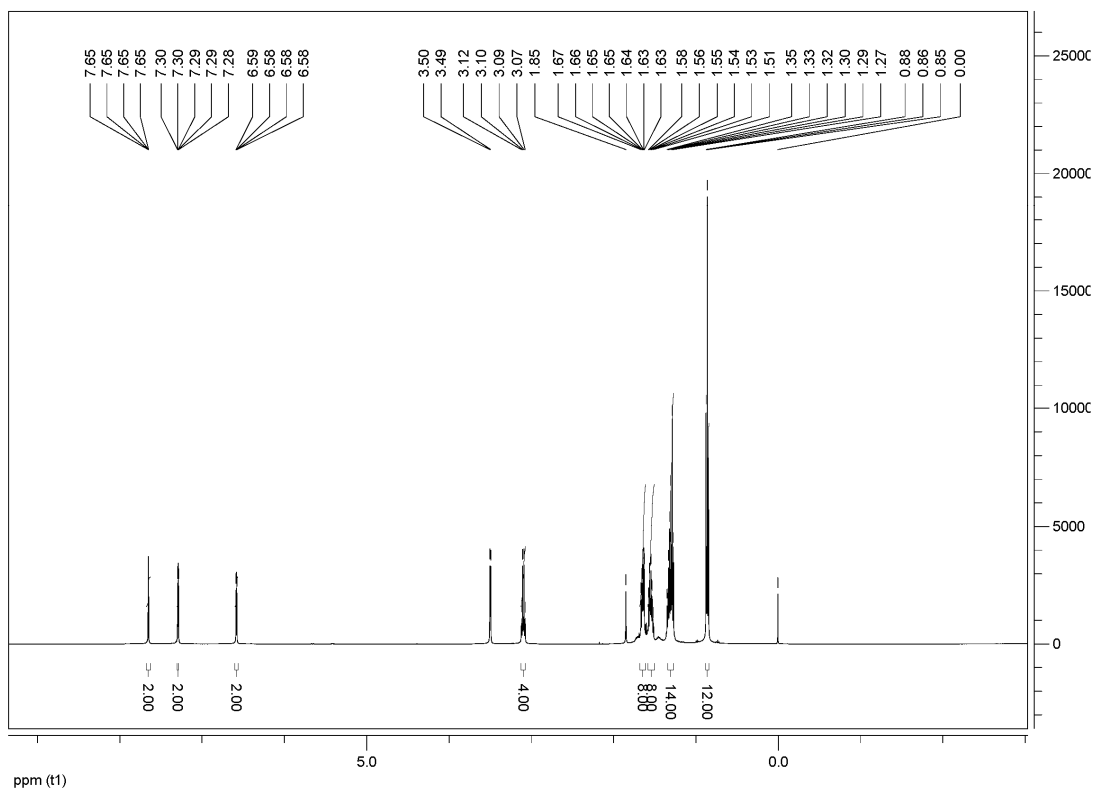

Figure S73 The  $^1\text{H}$  NMR spectra of **8b**

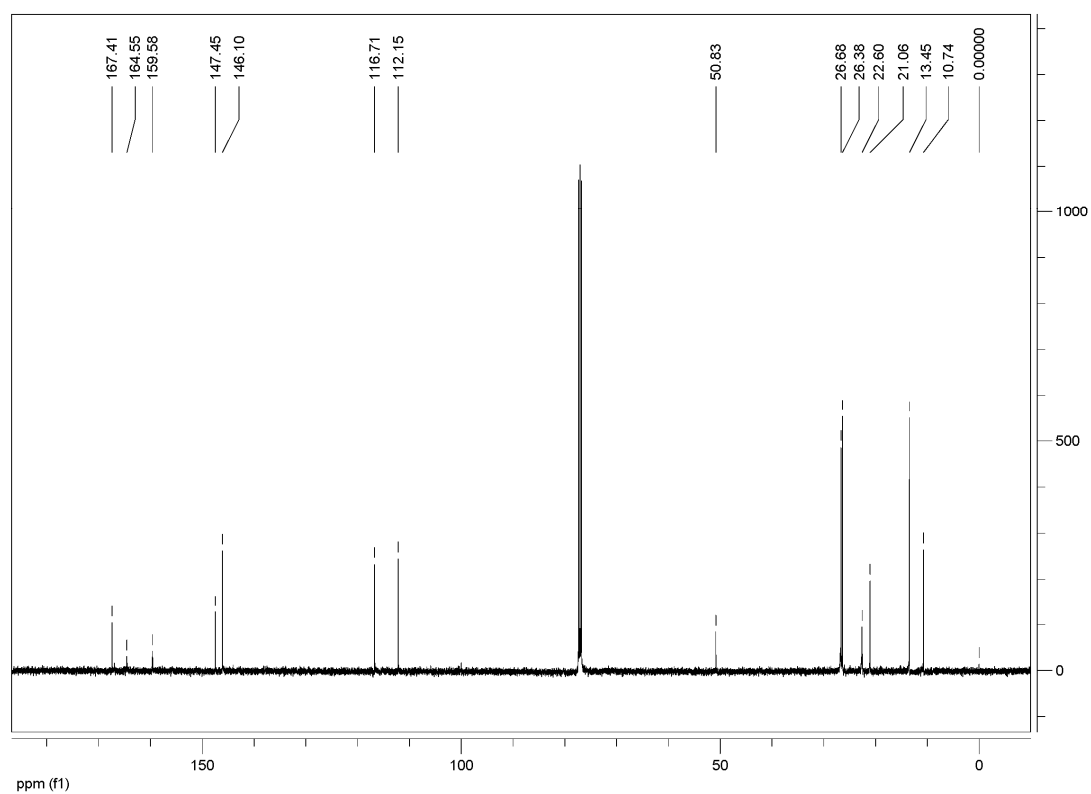

Figure S74 The  $^{13}\text{C}$  NMR spectra of **8b**

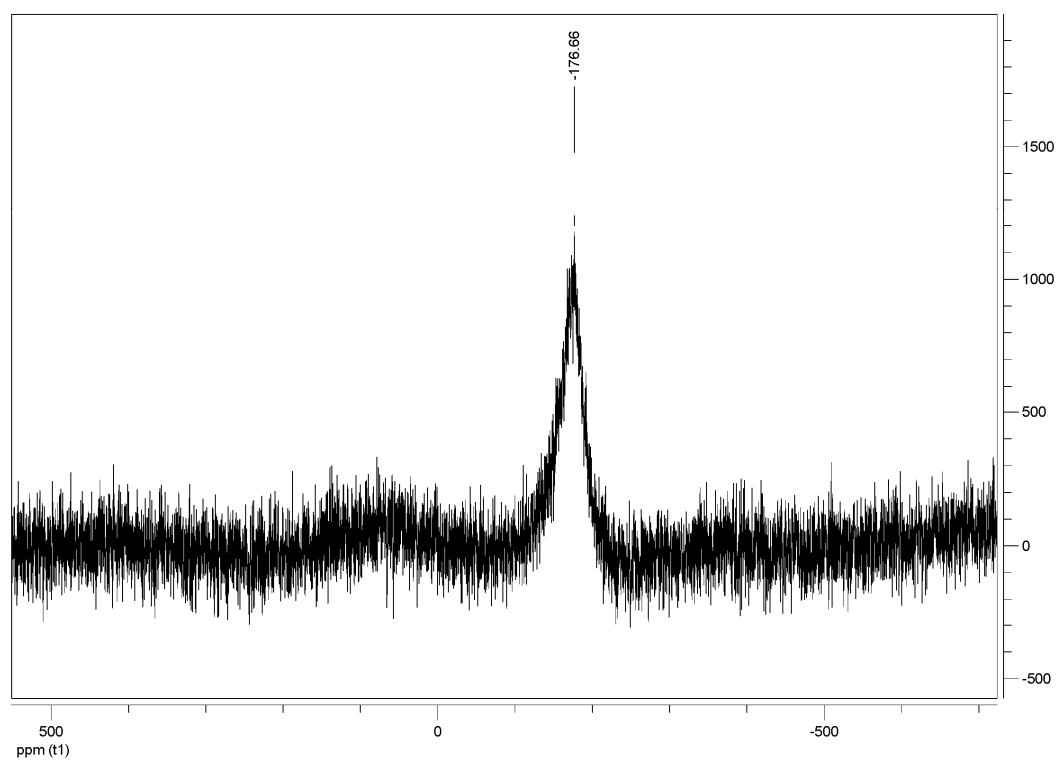

Figure S75 The  $^{119}\text{Sn}$  NMR spectra of **8b**

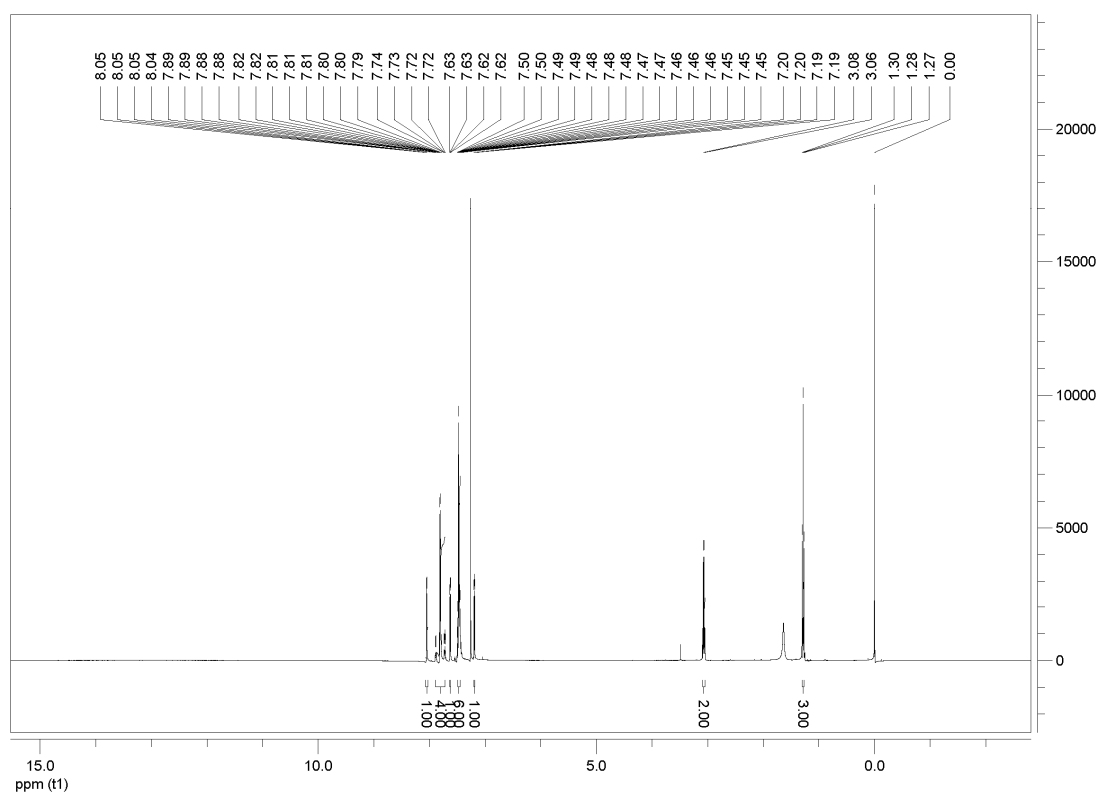

Figure S76 The <sup>1</sup>H NMR spectra of **9a**

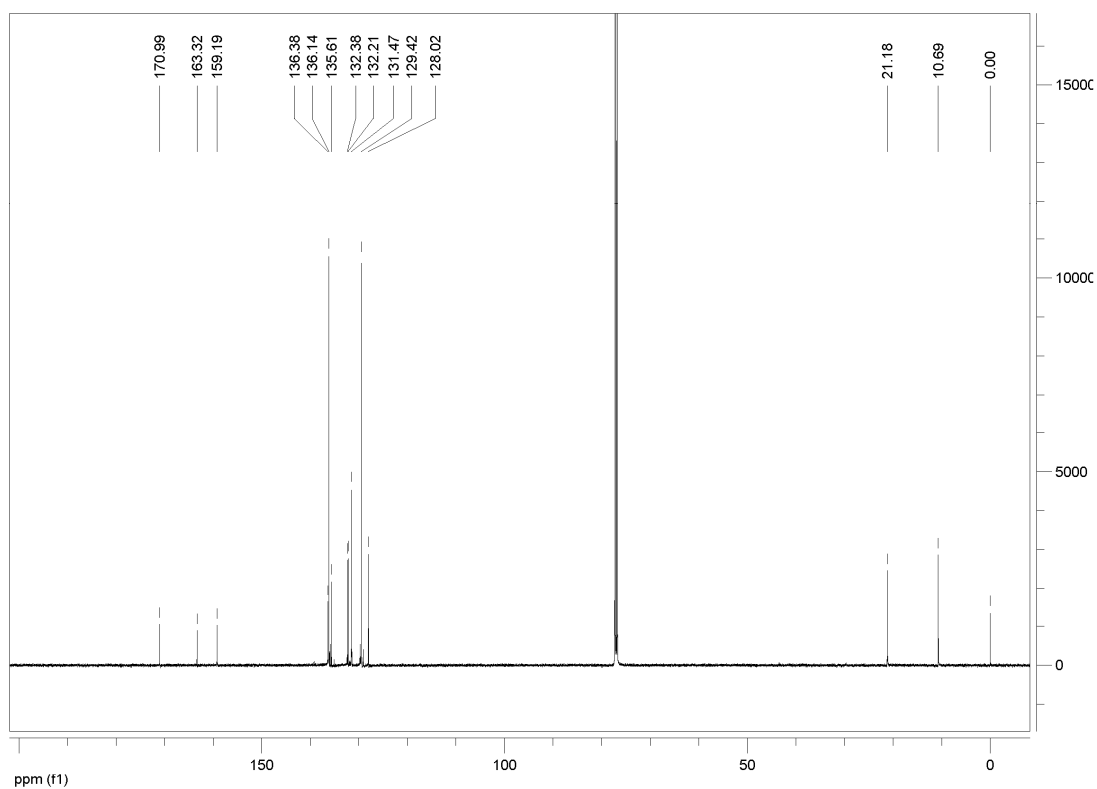

Figure S77 The <sup>13</sup>C NMR spectra of **9a**





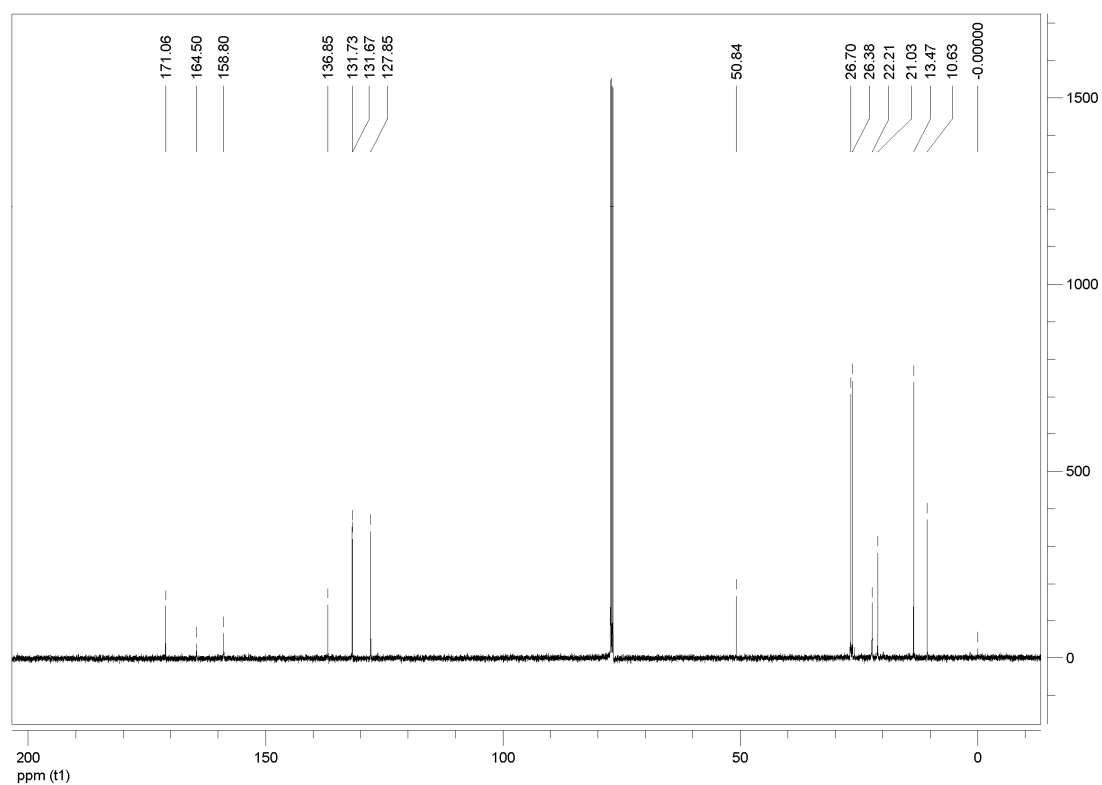

Figure S80 The  $^{13}\text{C}$  NMR spectra of **9b**

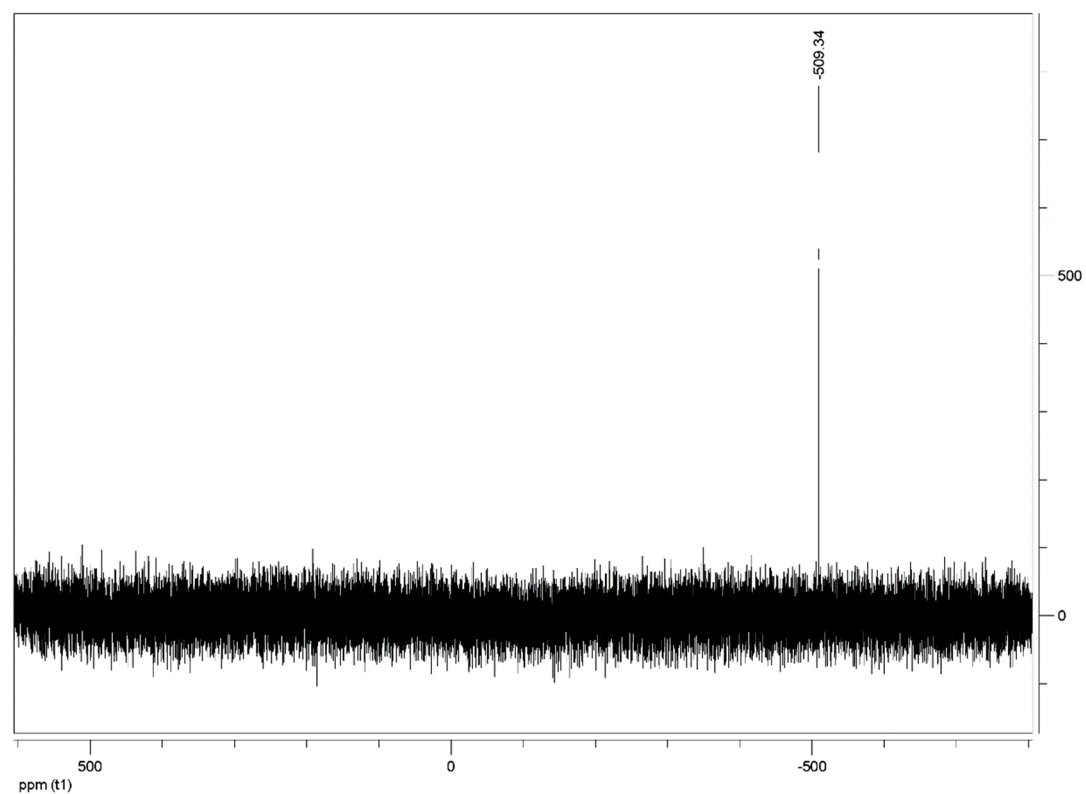

Figure S81 The  $^{119}\text{Sn}$  NMR spectra of **9b**

### 3.3 The HRMS spectra of **1a-9b**.

294.0968-1a #7 RT: 0.08 AV: 1 NL: 2.03E7  
T: FTMS + p ESI Full ms [150.00-2000.00]

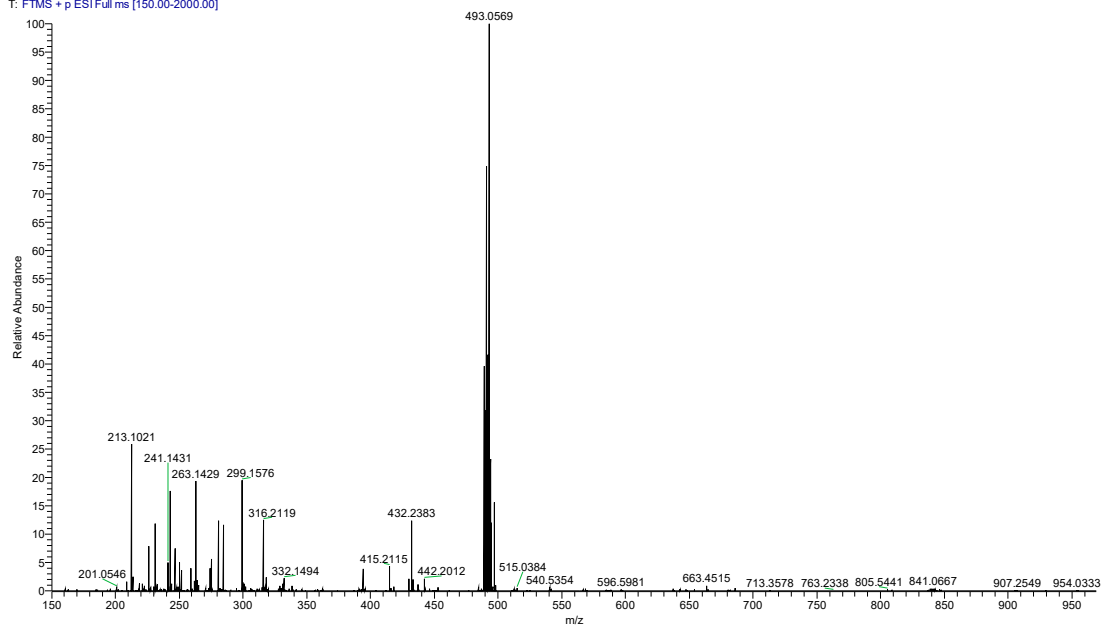

Figure S82 The HRMS spectra of **1a**

021R

fwj-20210514-018 182 (0.726)

1: TOF MS ES+  
1.53e6

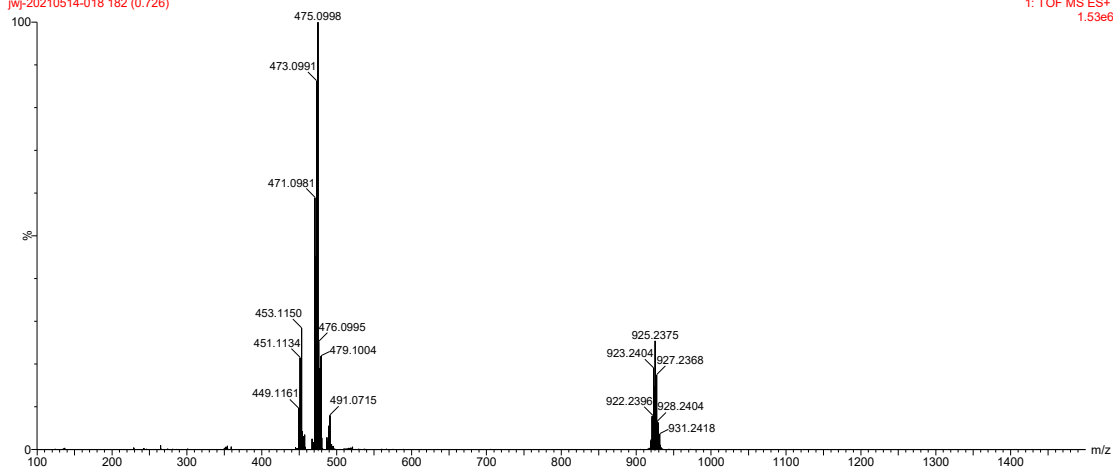

Figure S83 The HRMS spectra of **1b**

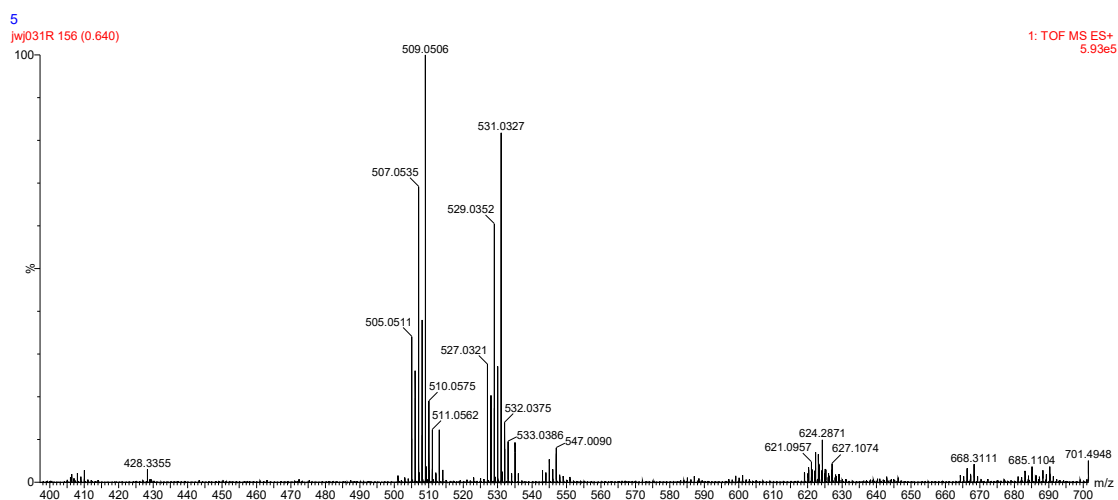

Figure S84 The HRMS spectra of **2a**

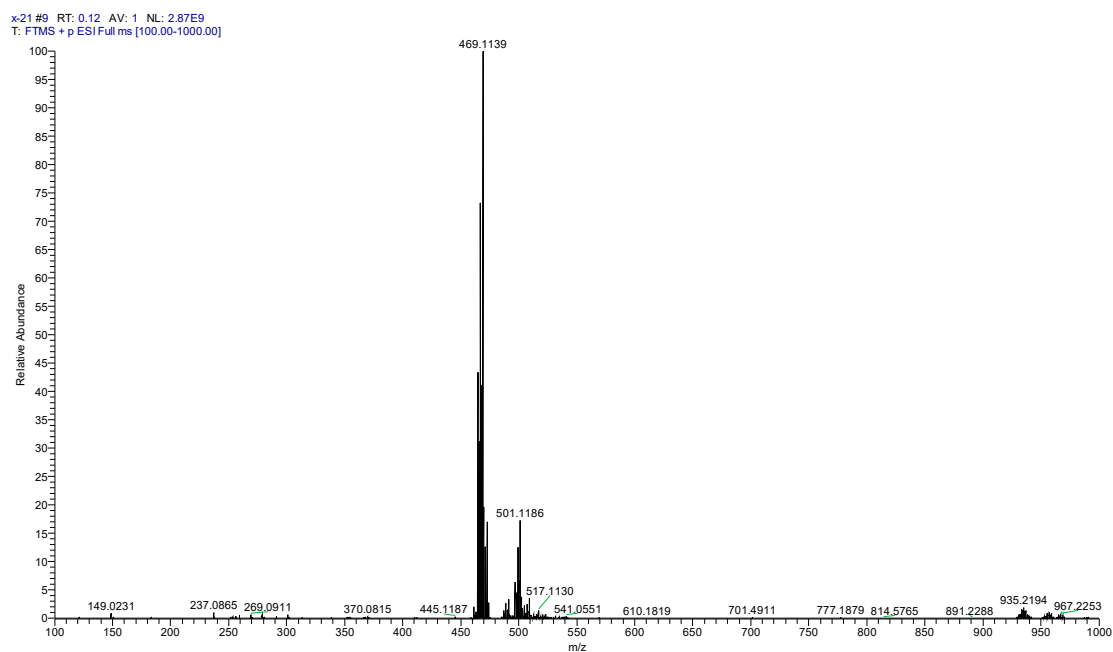

Figure S85 The HRMS spectra of **2b**

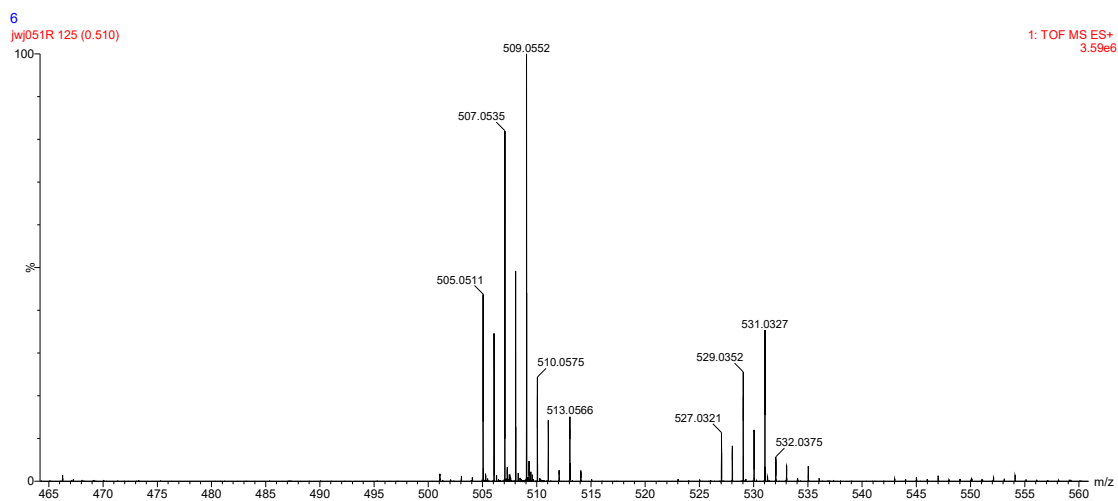

Figure S86 The HRMS spectra of **3a**

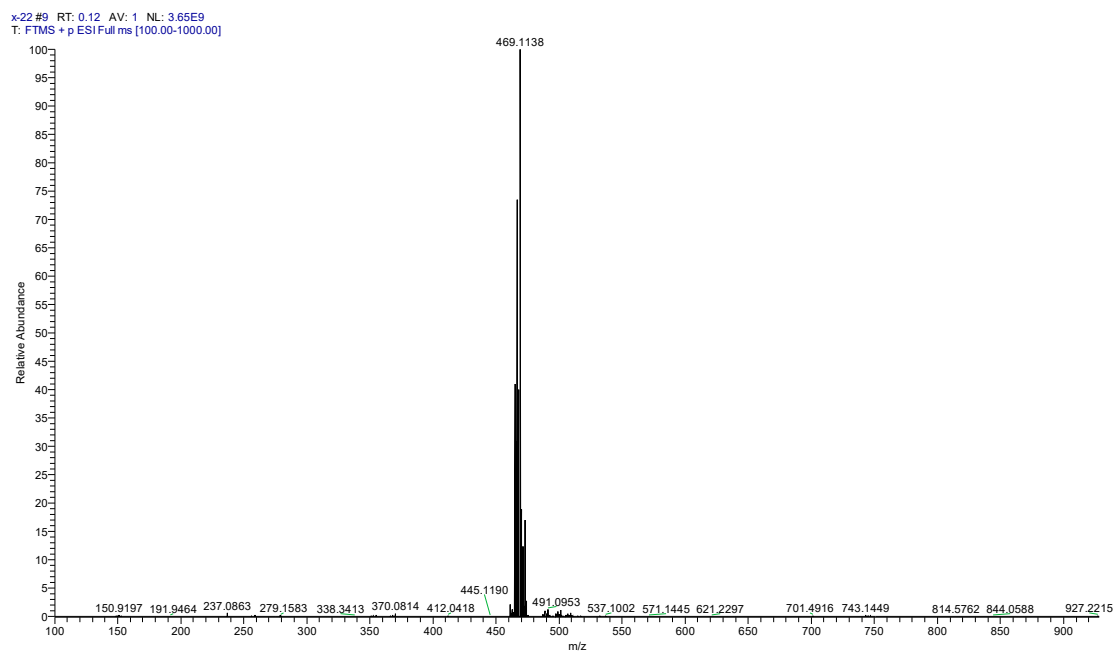

Figure S87 The HRMS spectra of **3b**

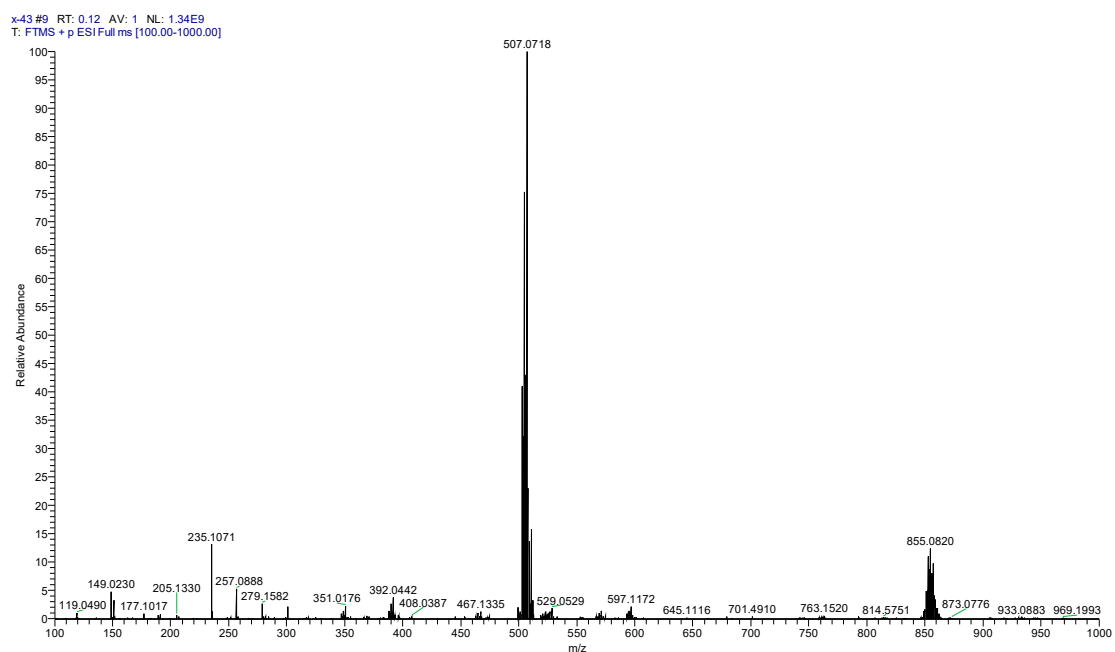

Figure S88 The HRMS spectra of **4a**

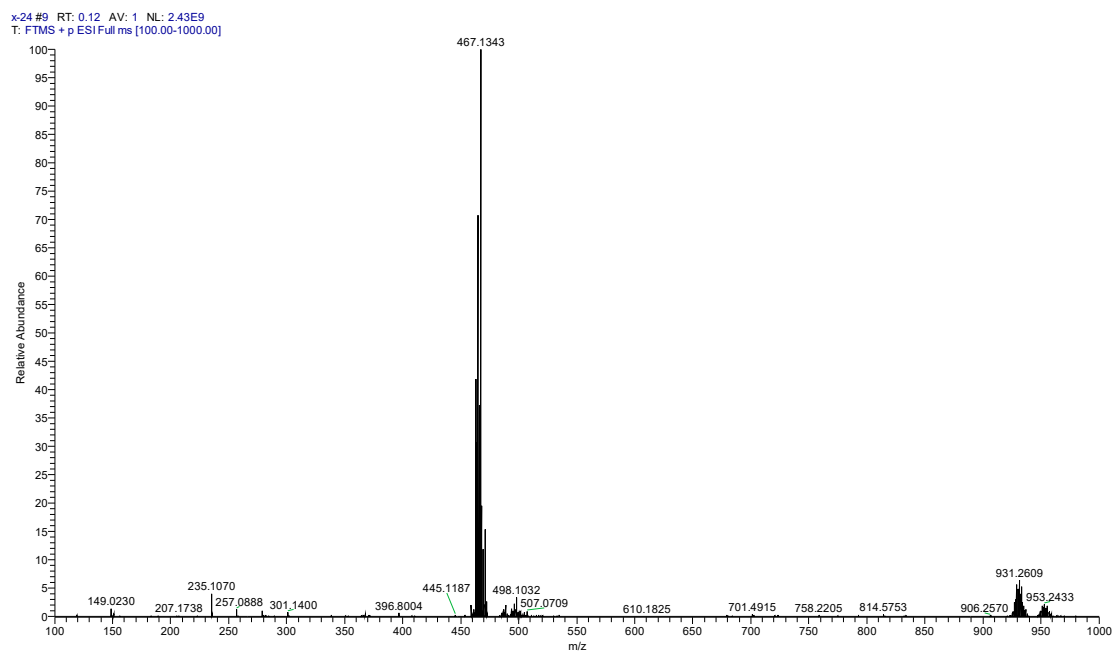

Figure S89 The HRMS spectra of **4b**

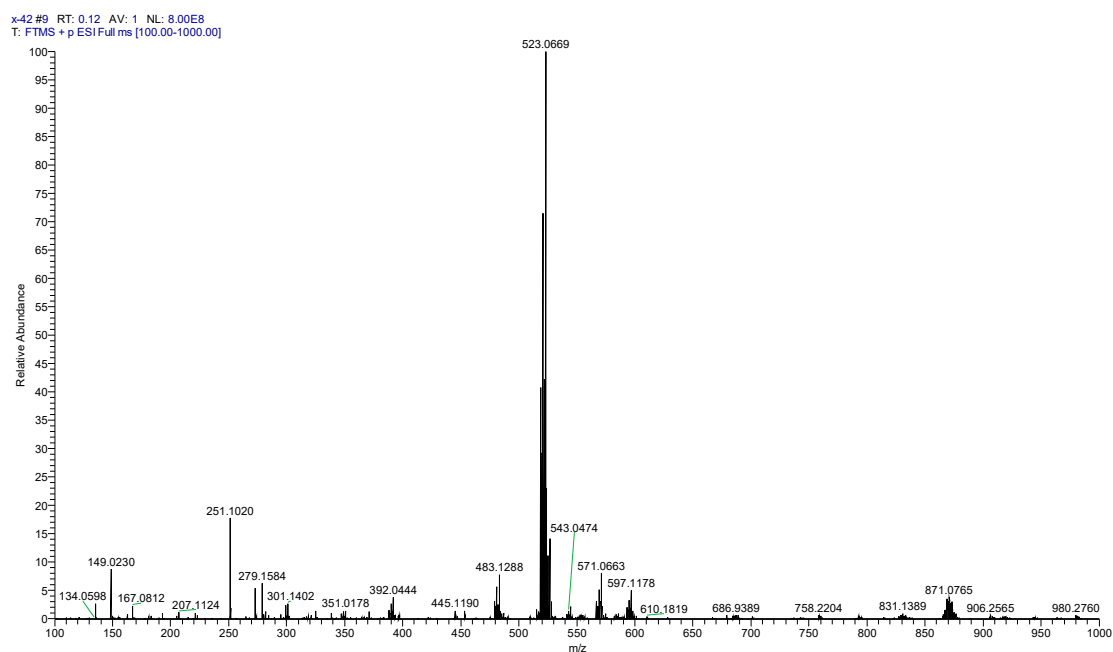

Figure S90 The HRMS spectra of **5a**

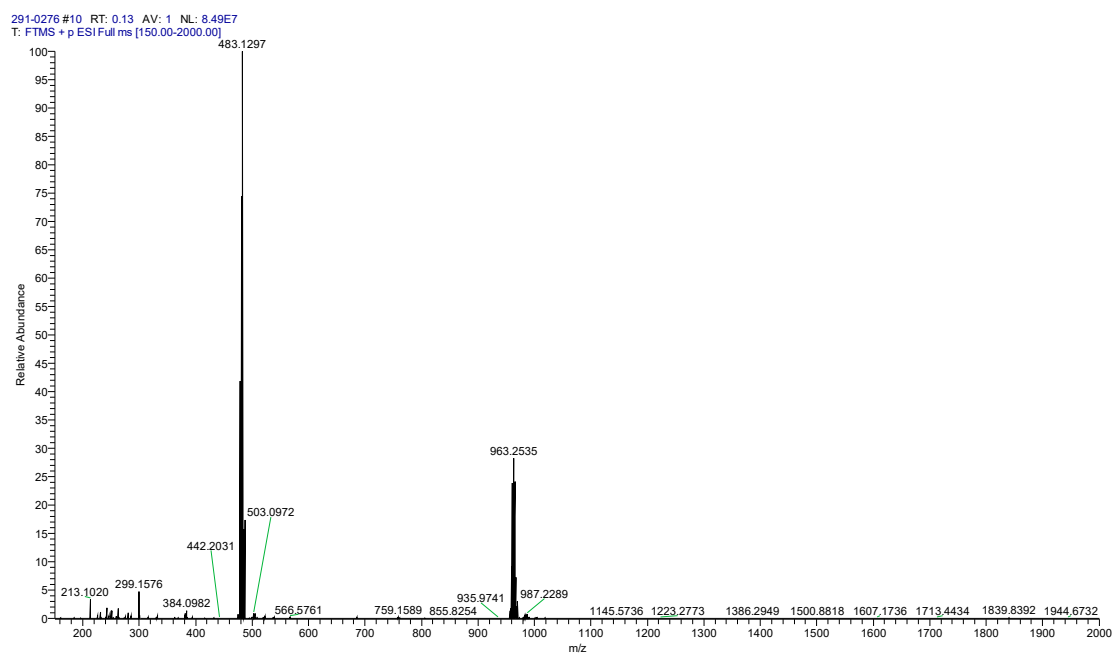

Figure S91 The HRMS spectra of **5b**

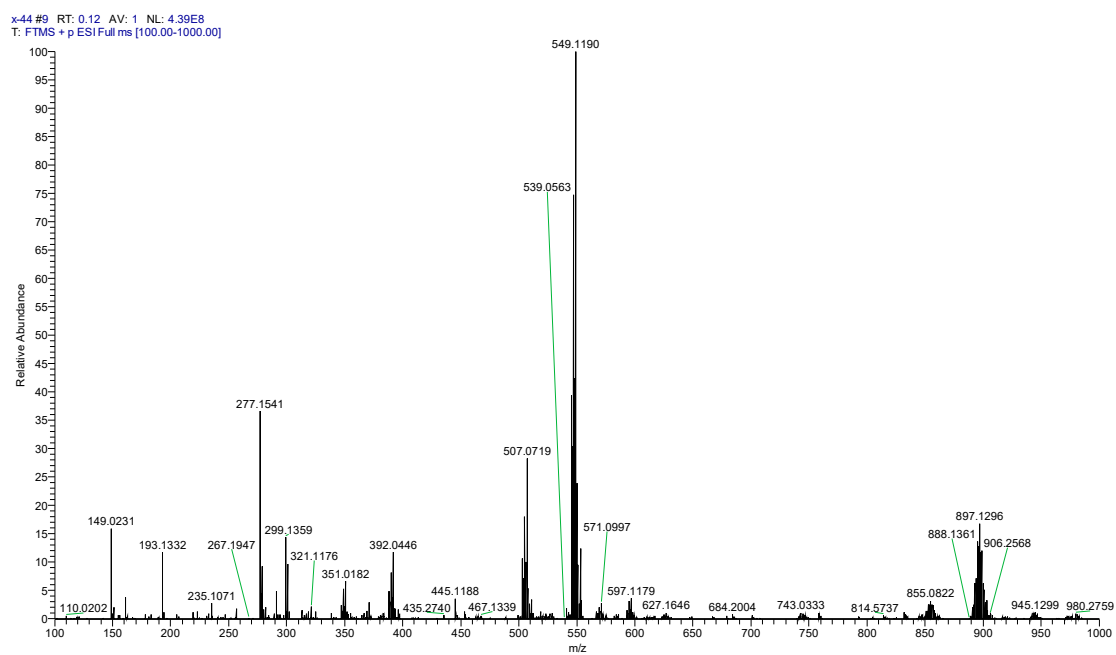

Figure S92 The HRMS spectra of **6a**

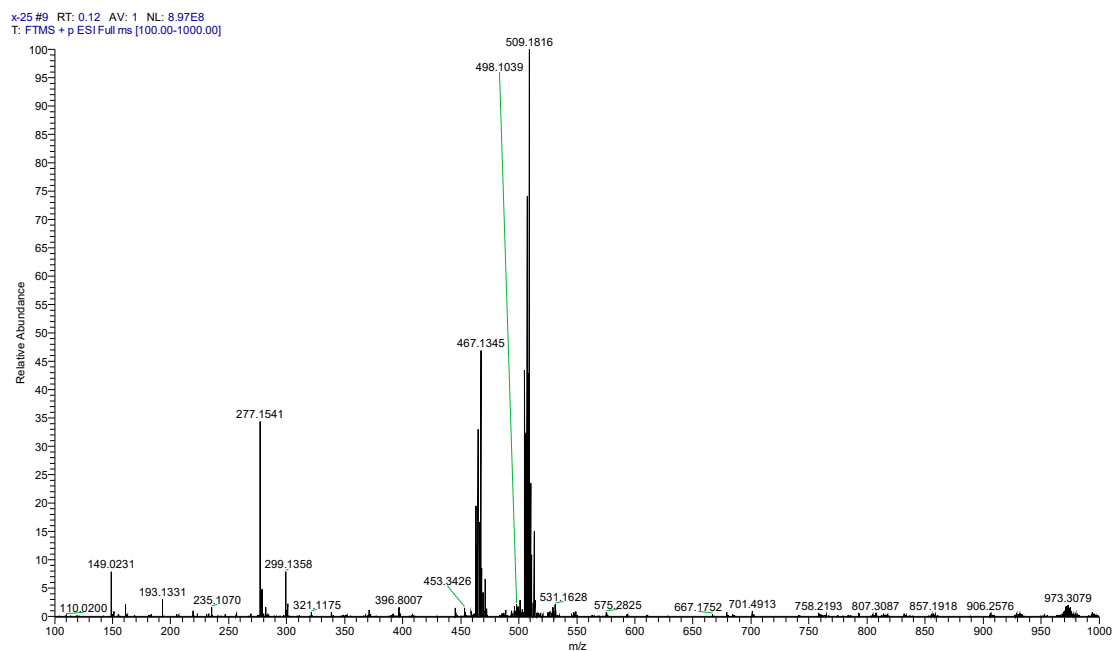

Figure S93 The HRMS spectra of **6b**

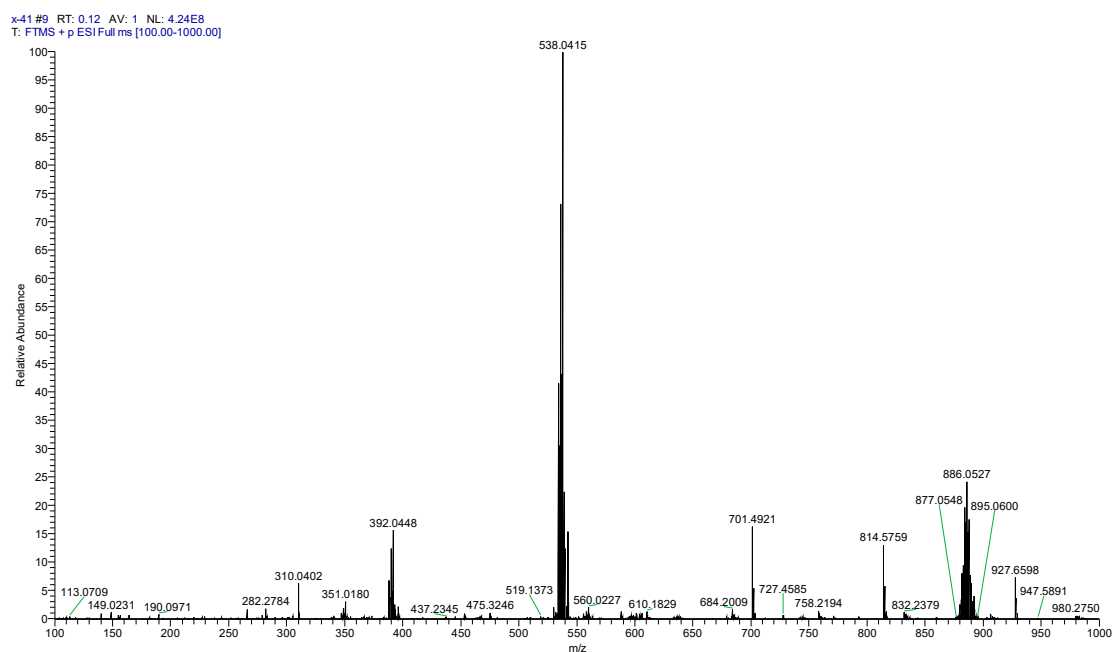

Figure S94 The HRMS spectra of **7a**

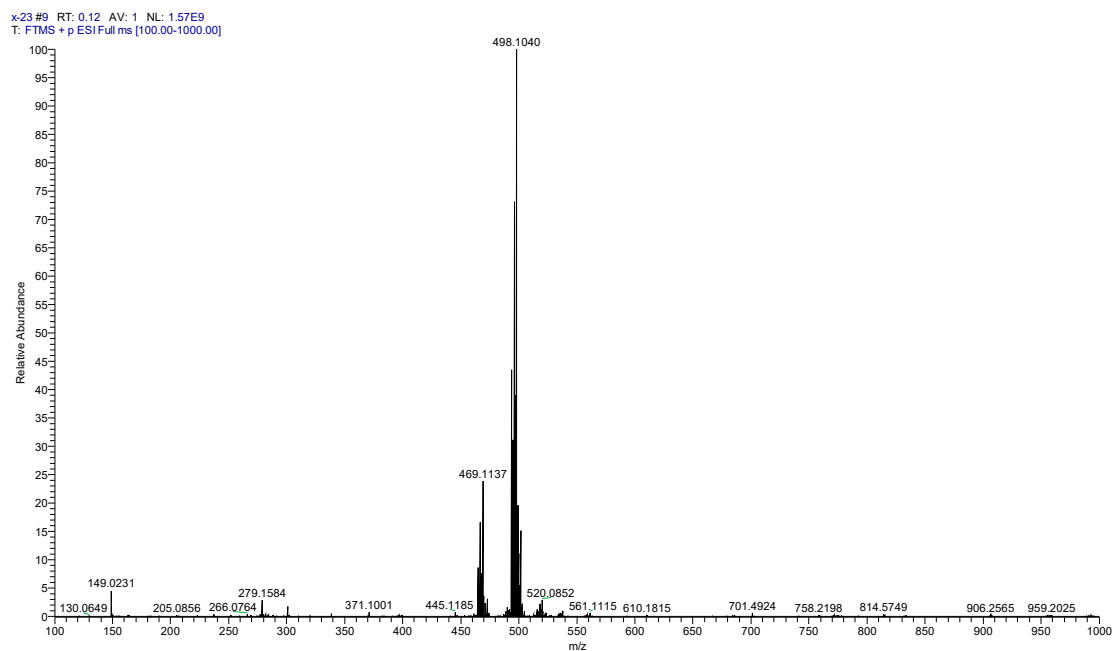

Figure S95 The HRMS spectra of **7b**

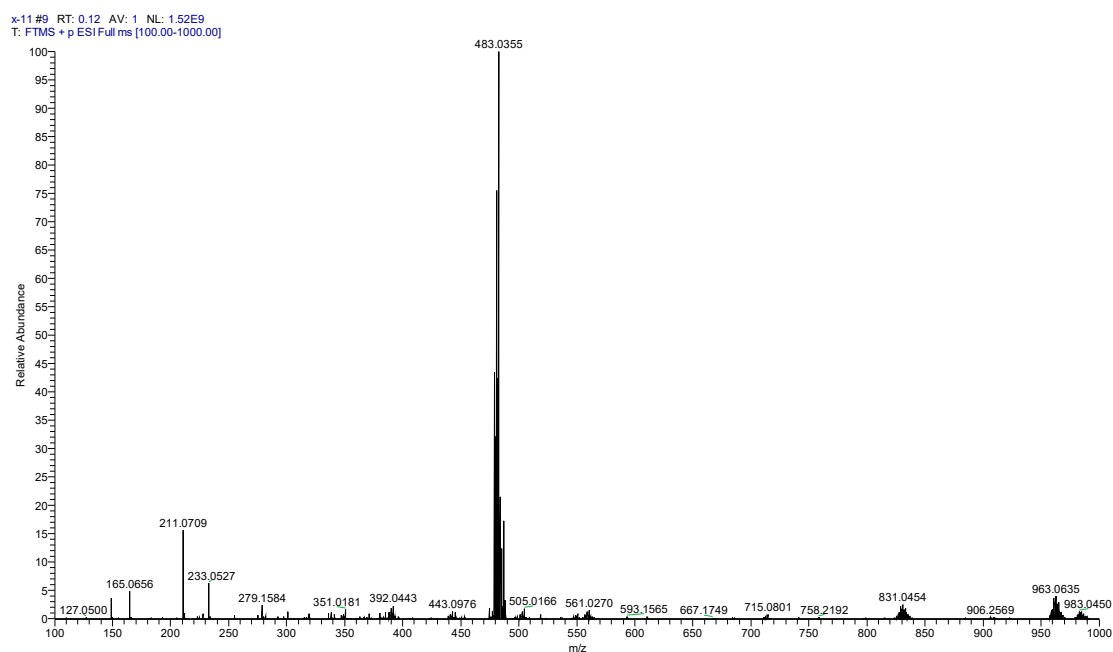

Figure S96 The HRMS spectra of **8a**



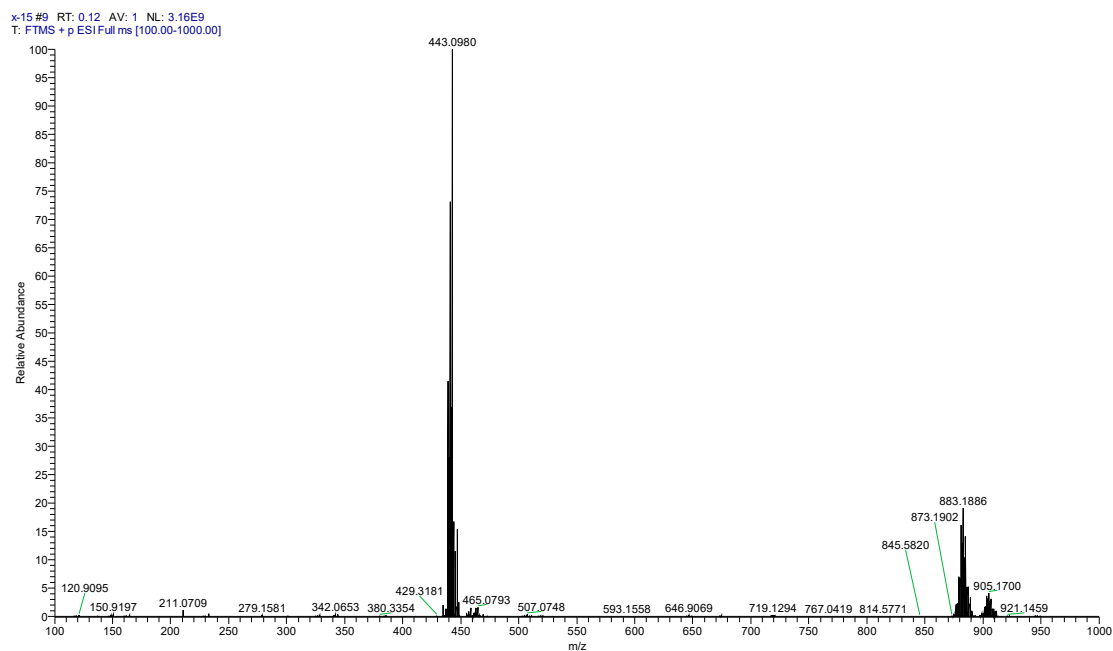

Figure S97 The HRMS spectra of **8b**

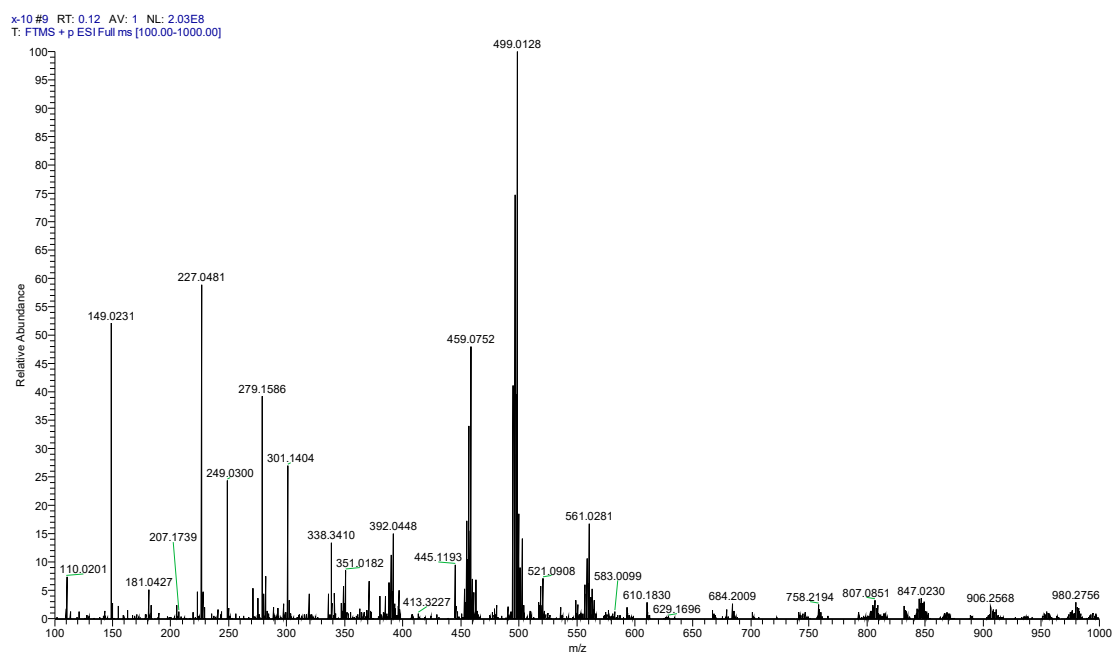

Figure S98 The HRMS spectra of **9a**

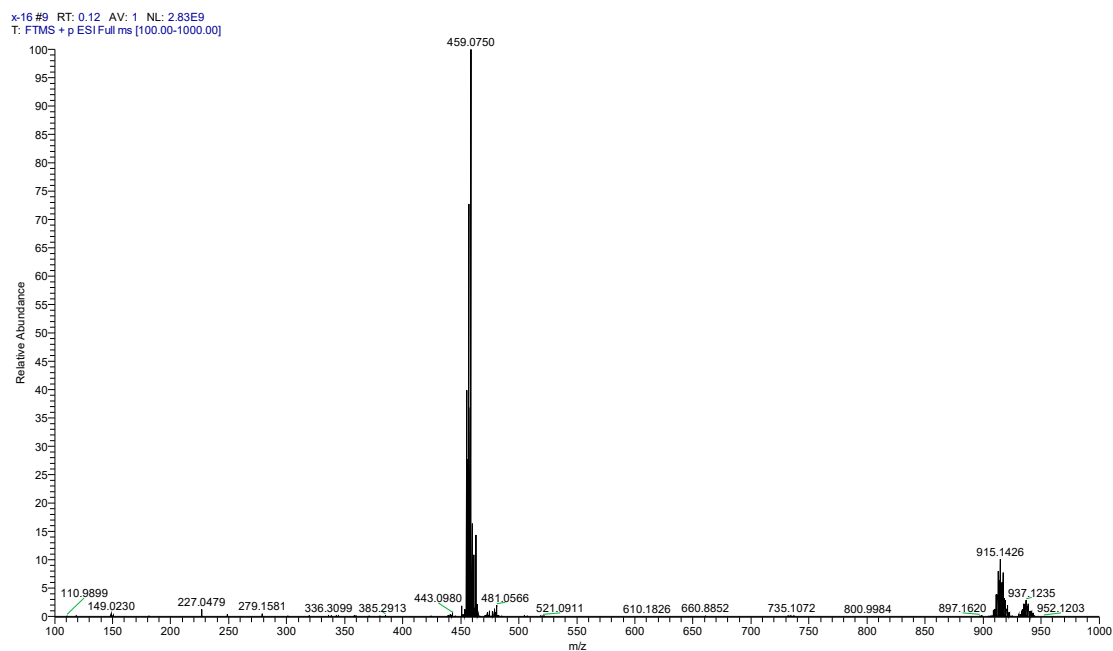

Figure S99 The HRMS spectra of **9b**

### 3.4 The UV-vis spectra of **1a-9b**.

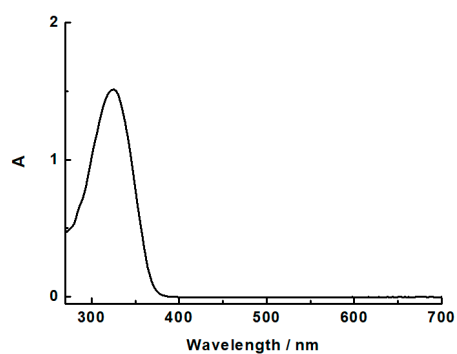

**1a**

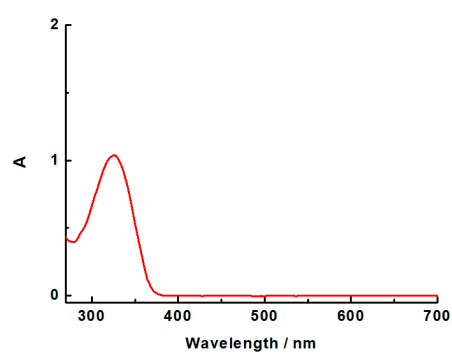

**1b**

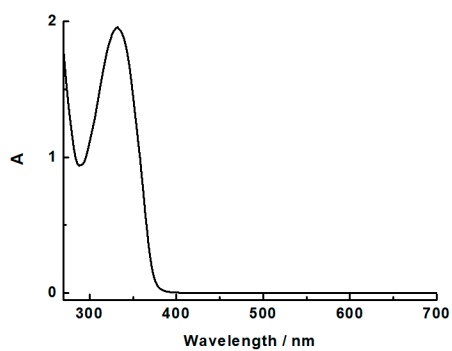

**2a**

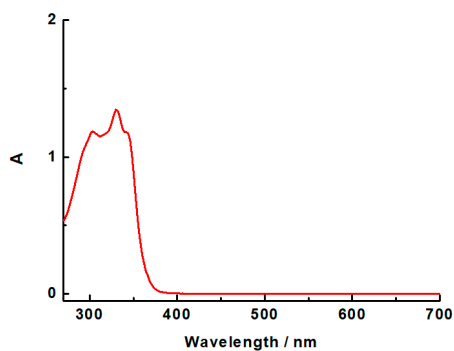

**2b**

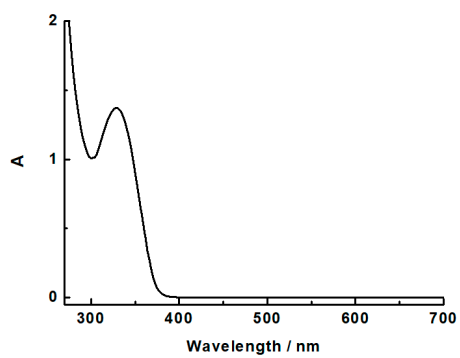

**3a**

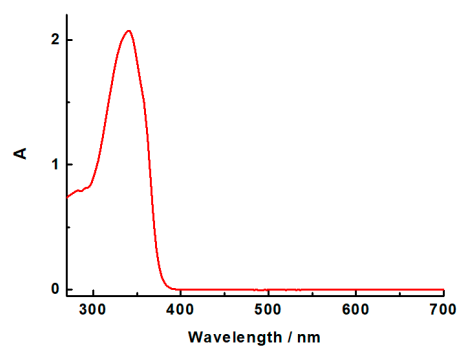

**3b**

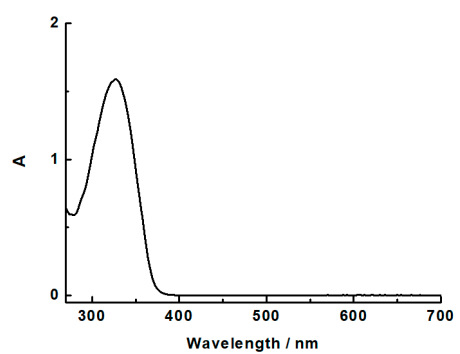

**4a**

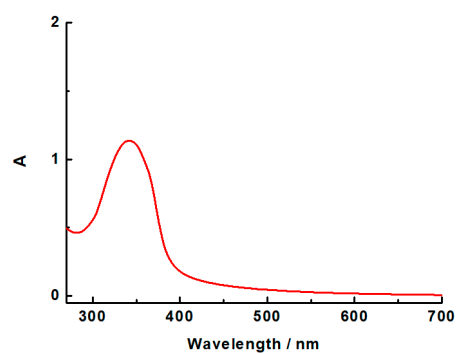

**4b**

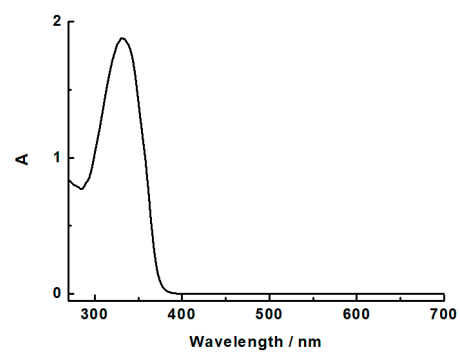

**5a**

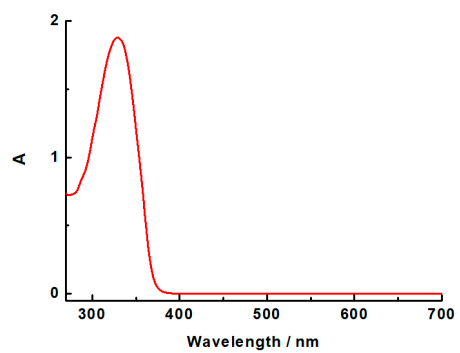

**5b**

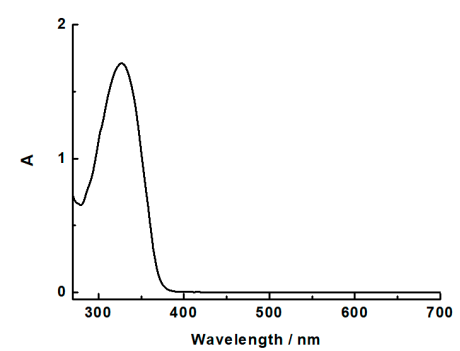

**6a**

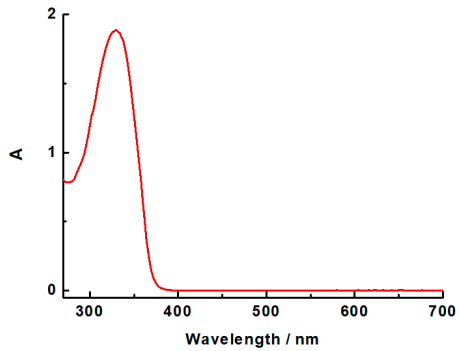

**6b**

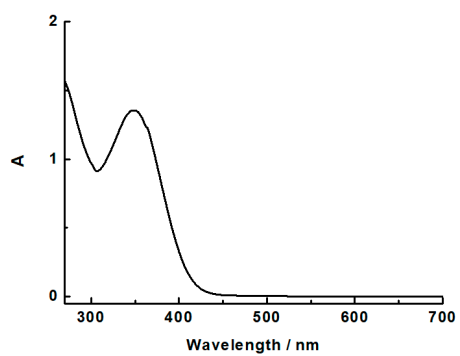

**7a**

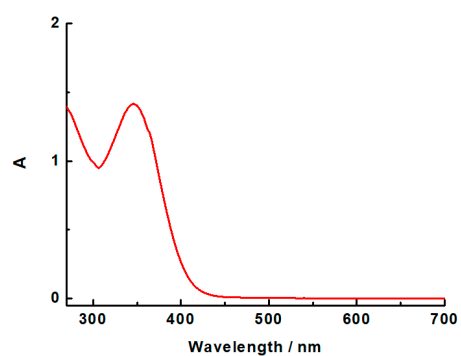

**7b**

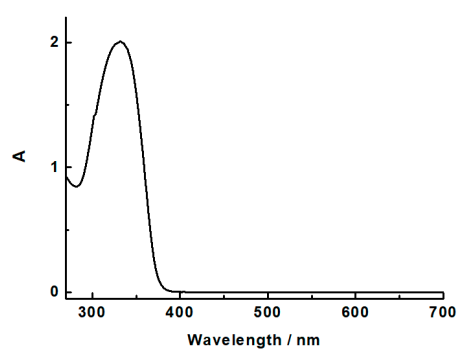

**8a**

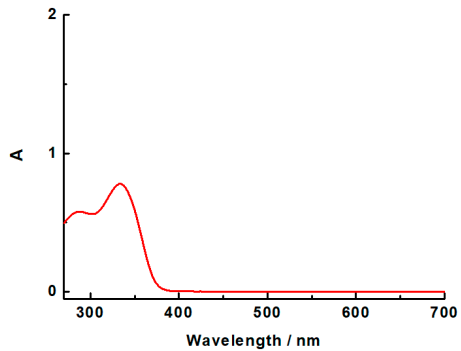

**8b**

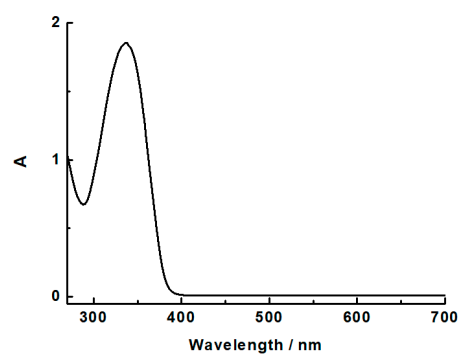

**9a**

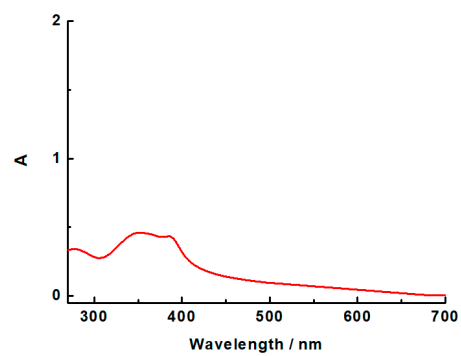

**9b**

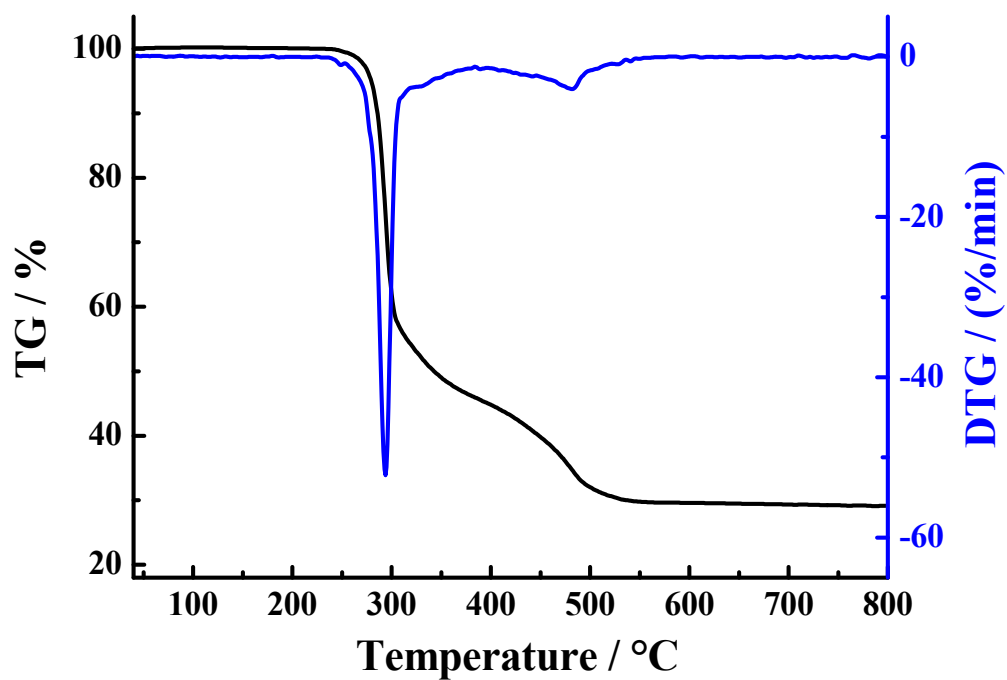

Figure S100 The TG-DTG curve of **1a**

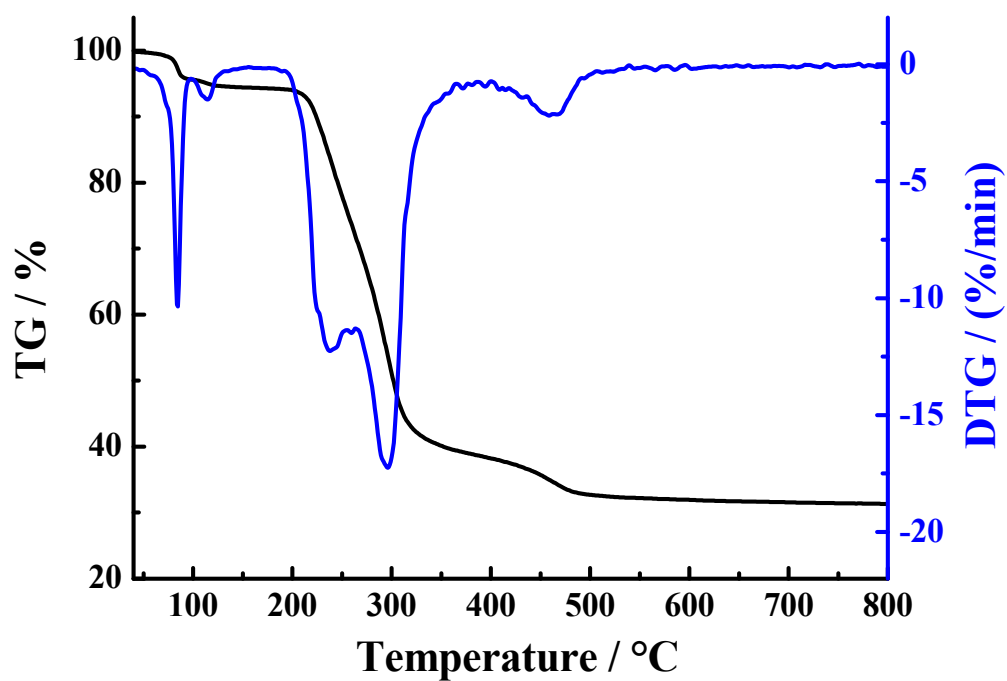

Figure S101 The TG-DTG curve of **1b**

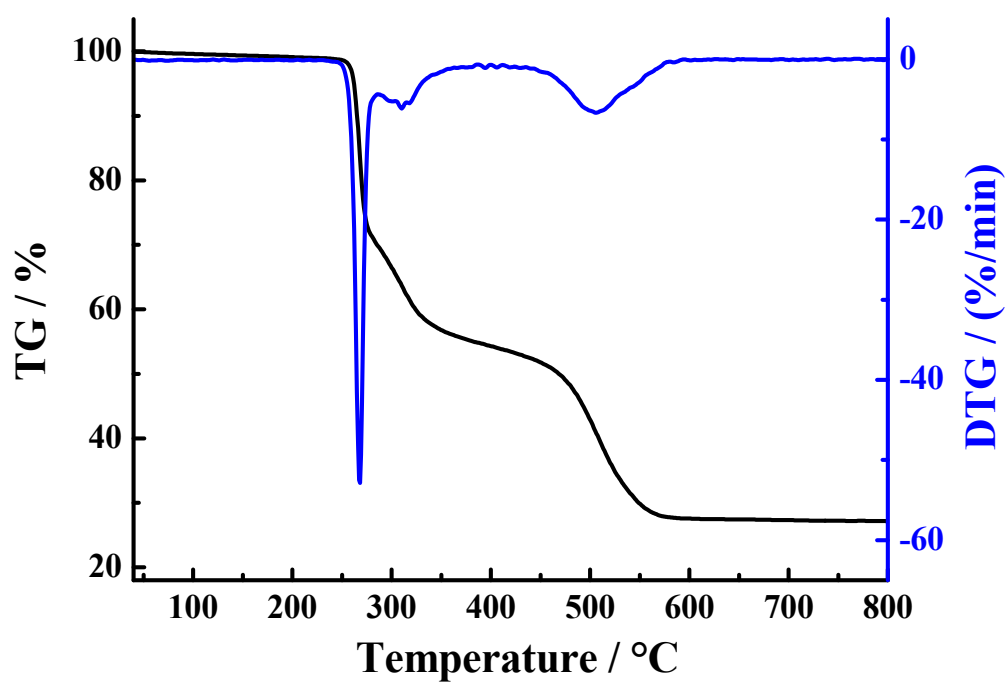

Figure S102 The TG-DTG curve of **2a**

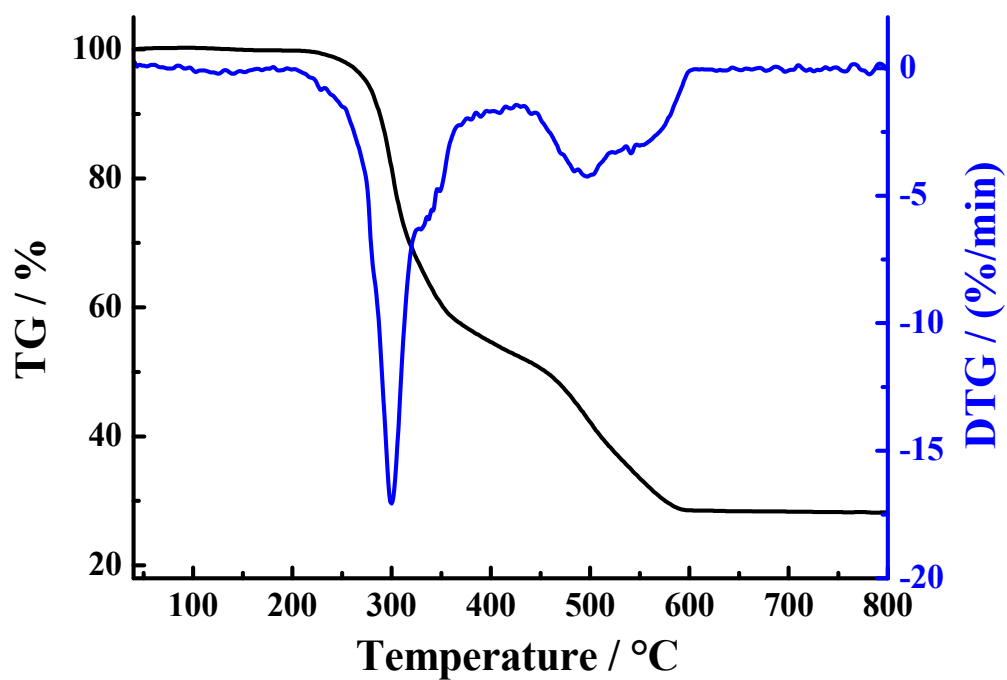

Figure S103 The TG-DTG curve of **2b**

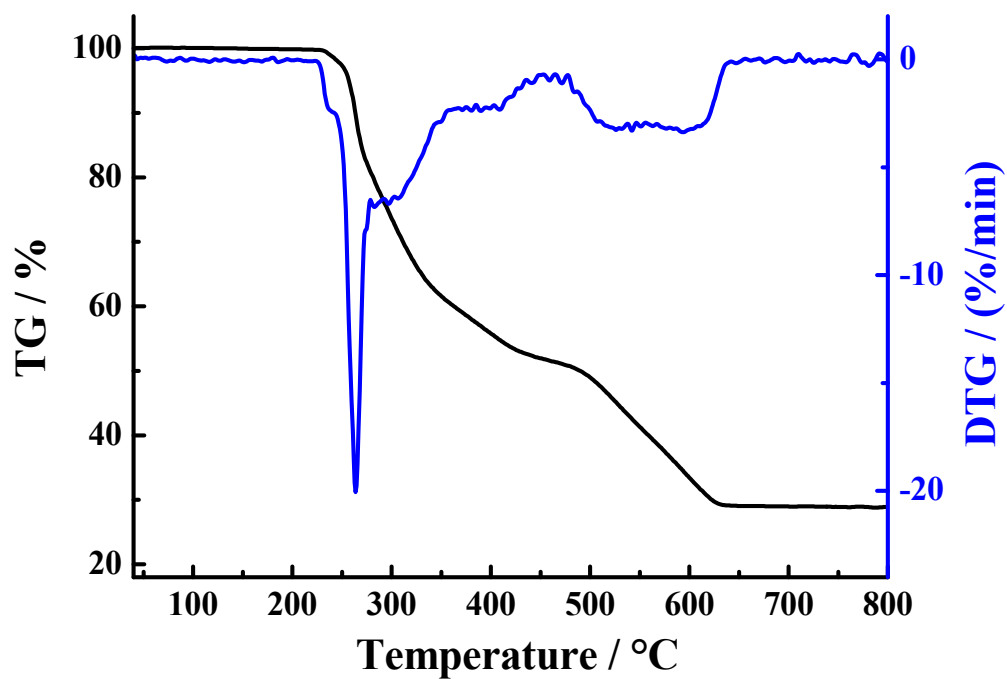

Figure S104 The TG-DTG curve of **3a**

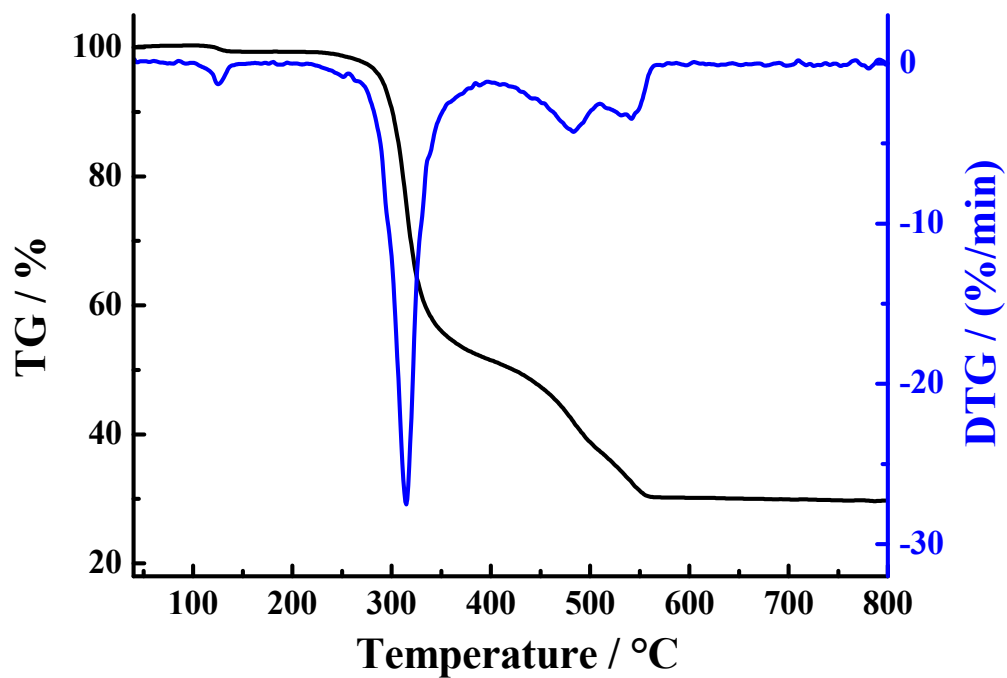

Figure S105 The TG-DTG curve of **3b**

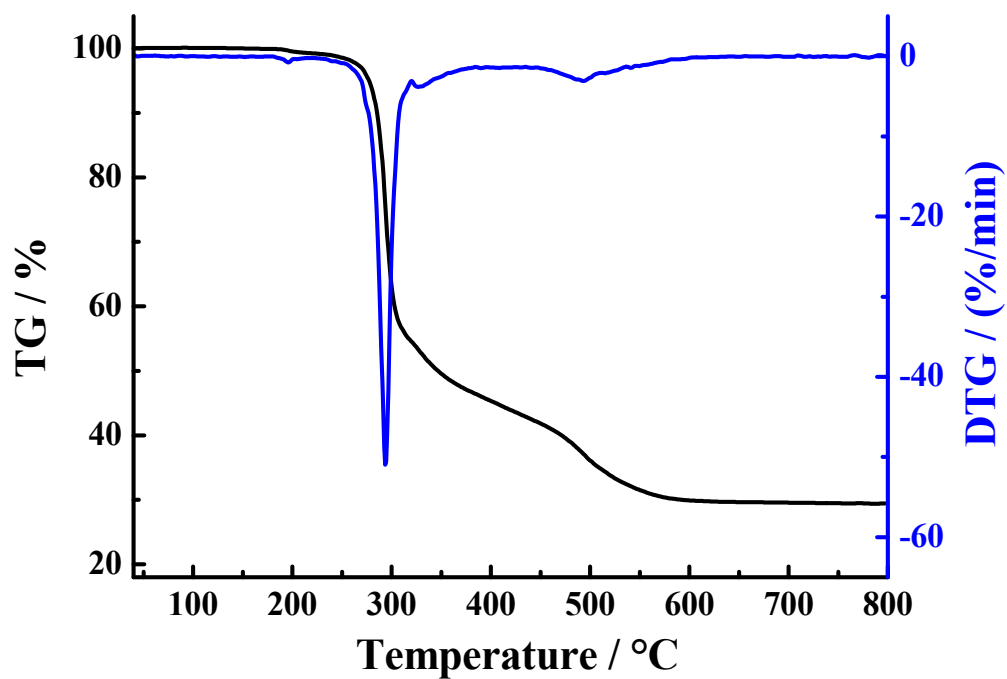

Figure S106 The TG-DTG curve of **4a**

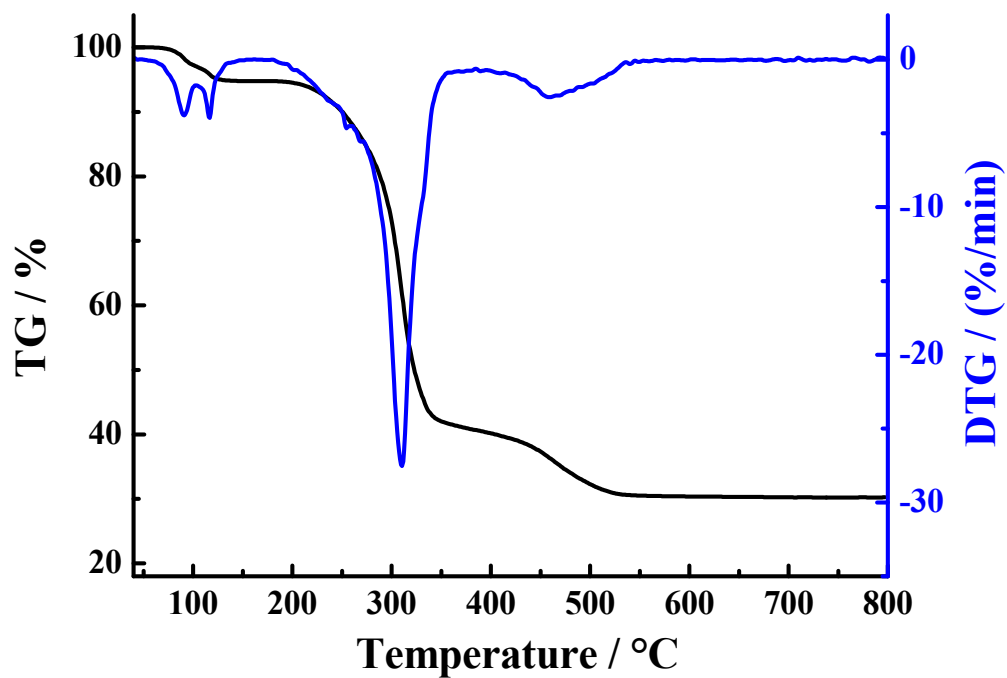

Figure S107 The TG-DTG curve of **4b**



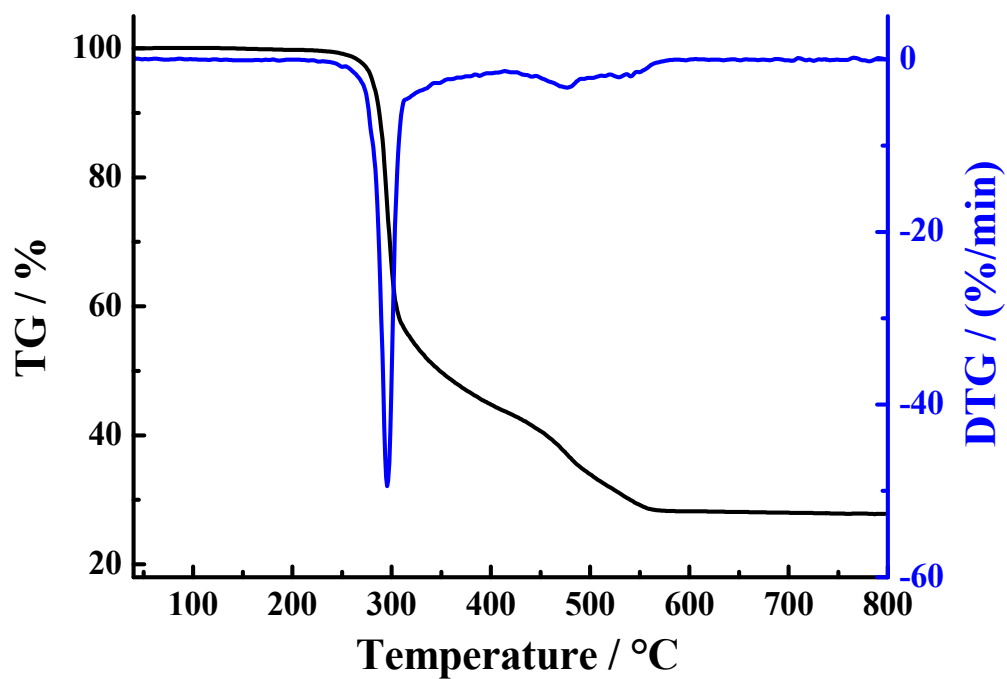

Figure S108 The TG-DTG curve of **5a**

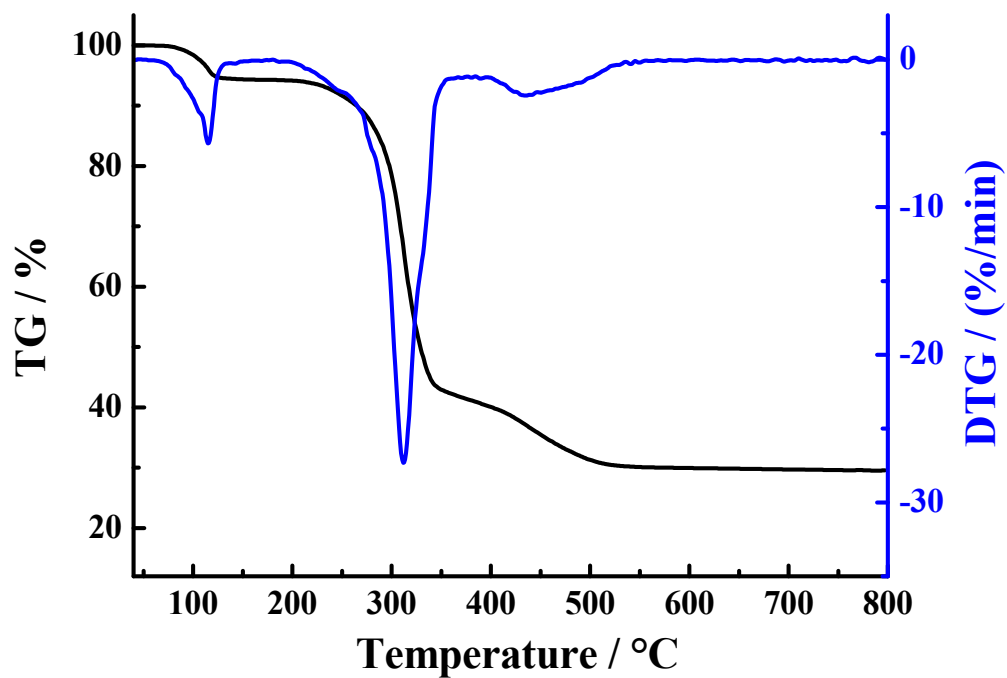

Figure S109 The TG-DTG curve of **5b**

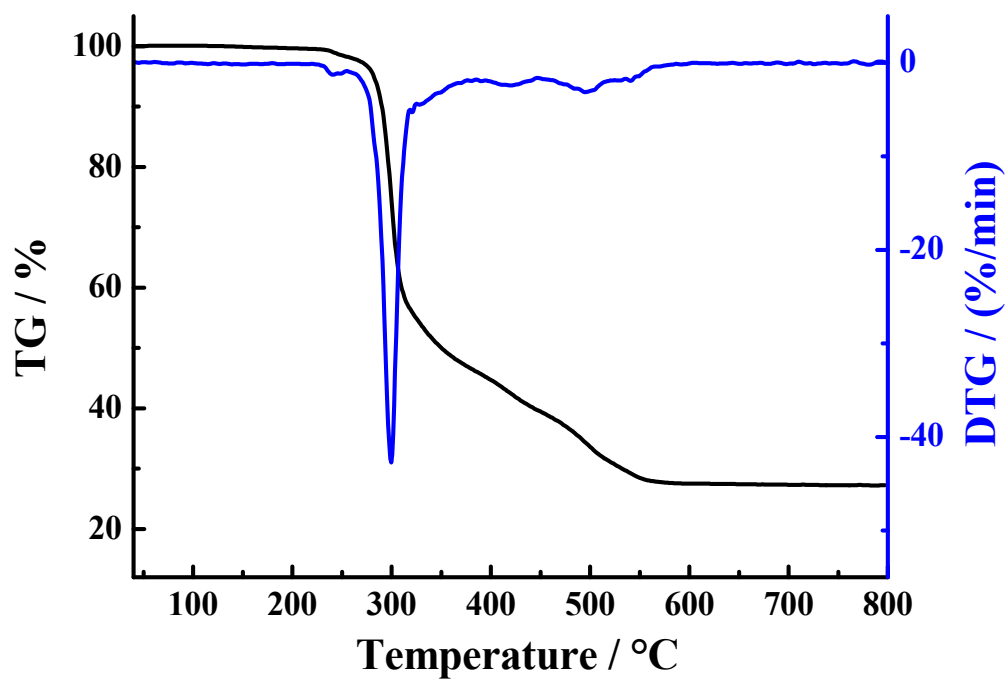

Figure S110 The TG-DTG curve of **6a**

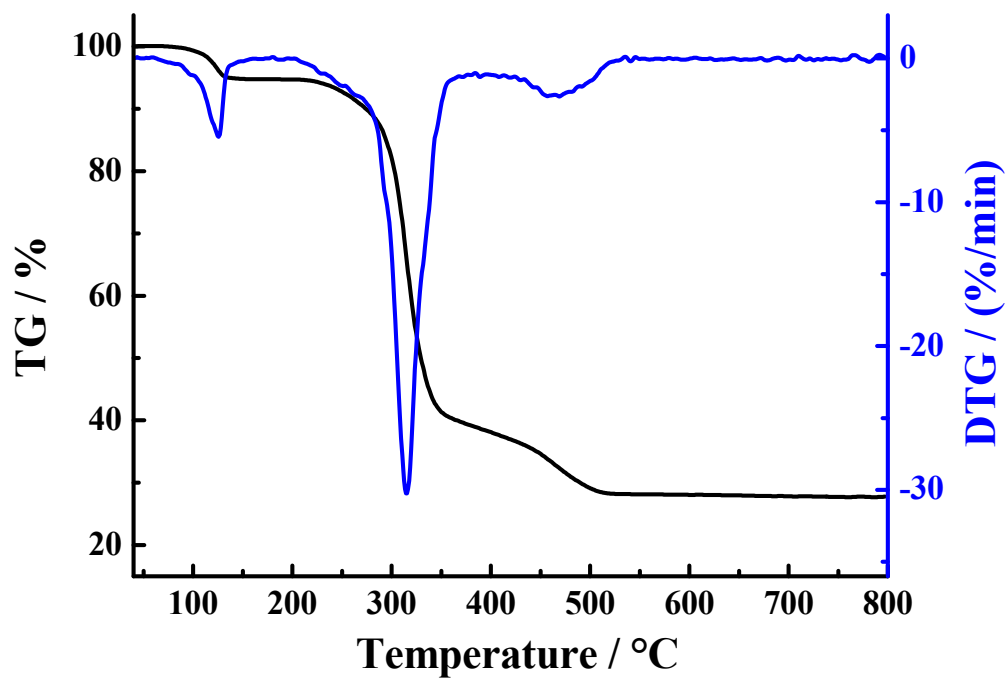

Figure S111 The TG-DTG curve of **6b**

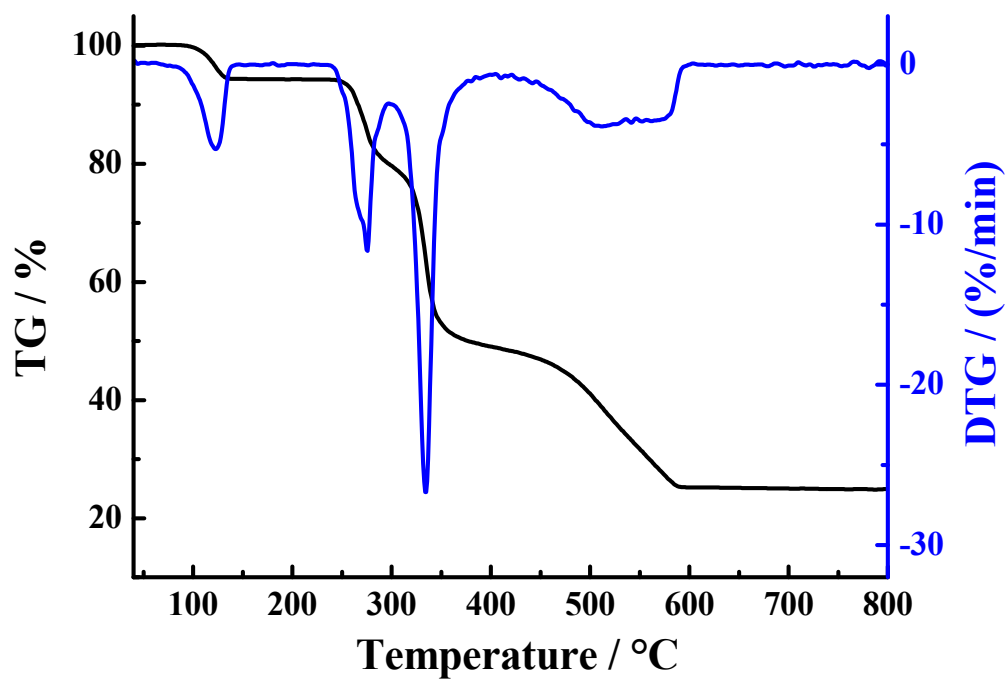

Figure S112 The TG-DTG curve of 7a

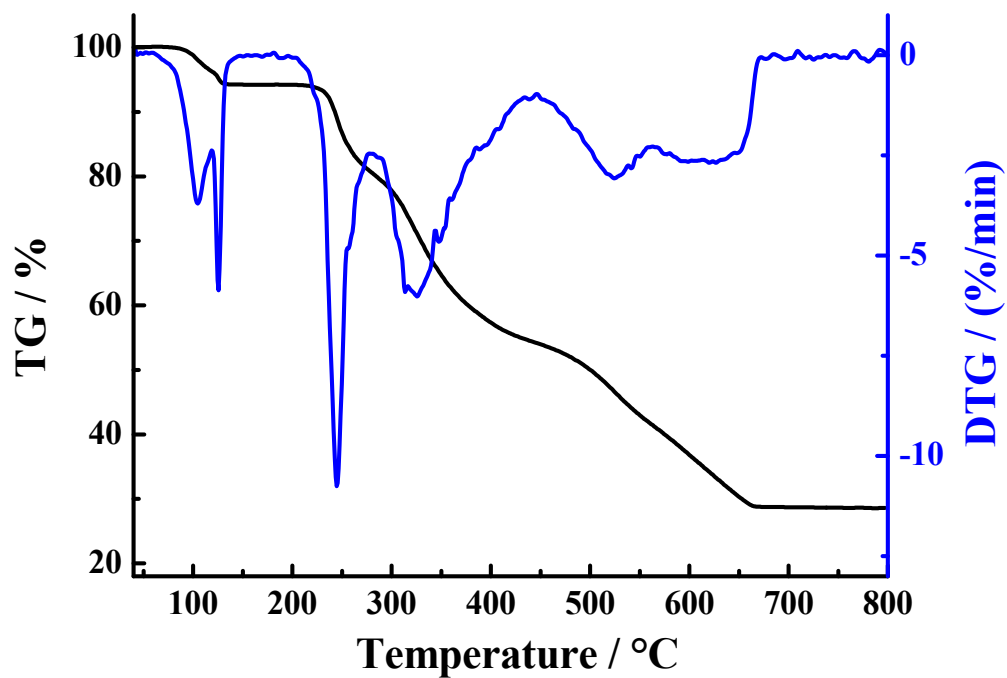

Figure S113 The TG-DTG curve of 7b

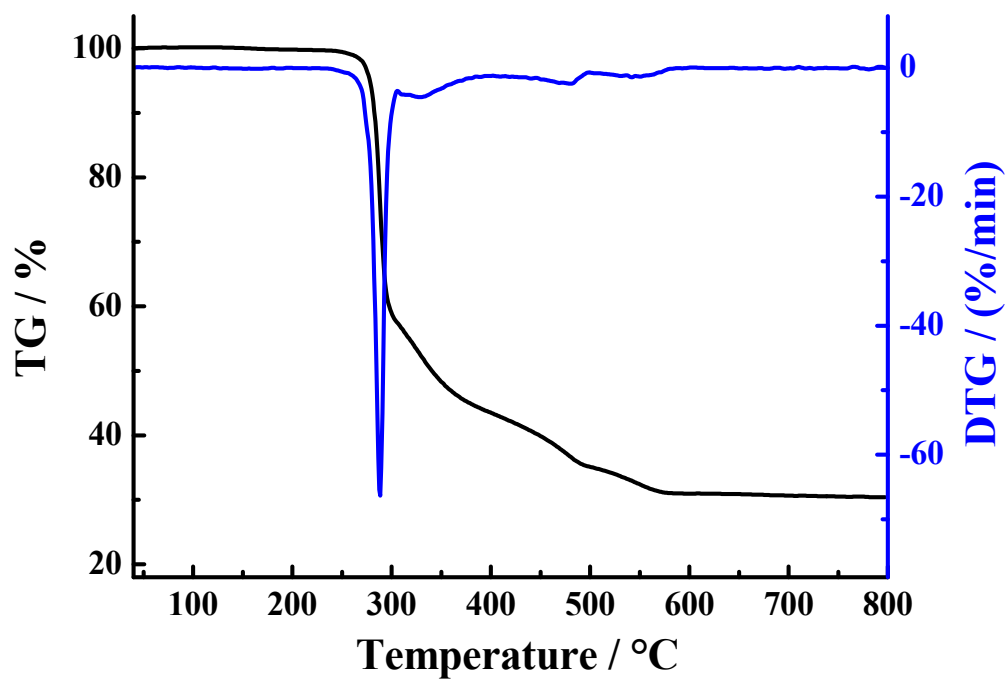

Figure S114 The TG-DTG curve of **8a**

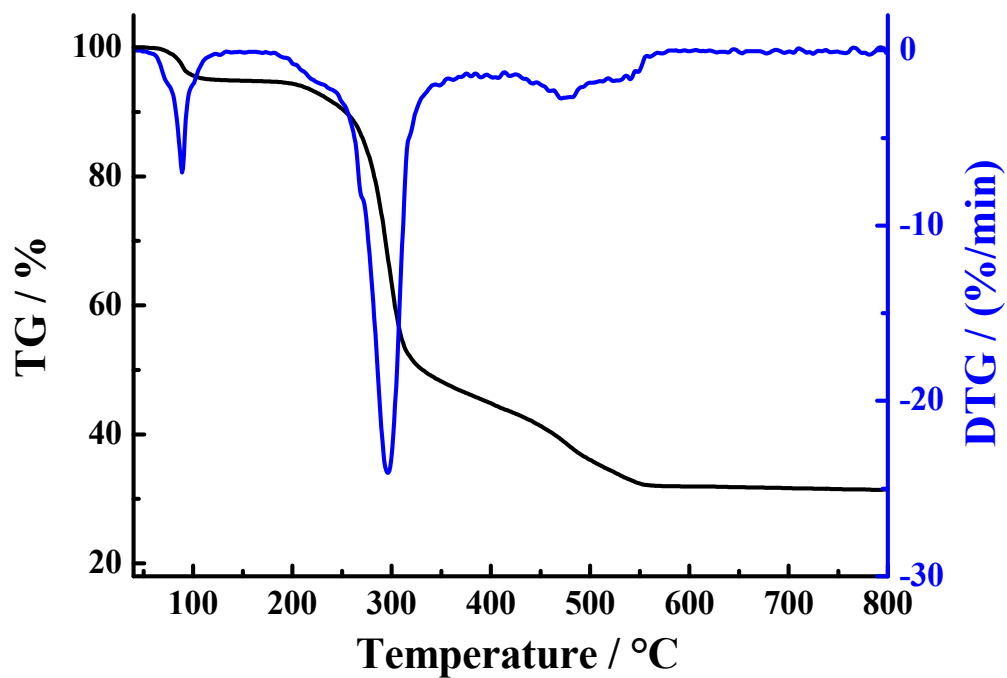

Figure S115 The TG-DTG curve of **8b**

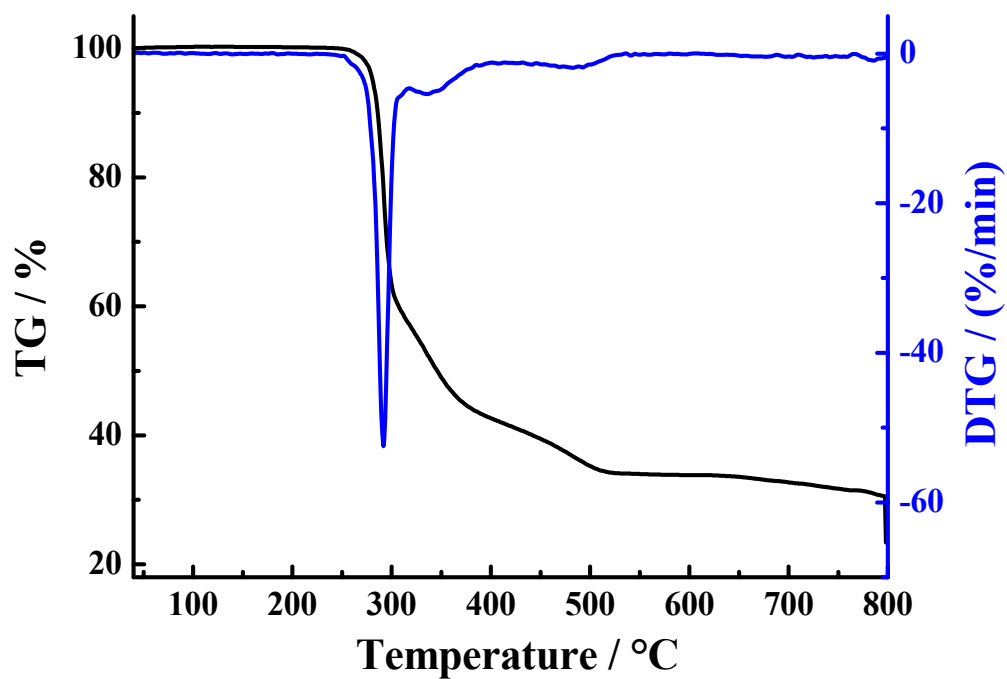

Figure S116 The TG-DTG curve of **9a**

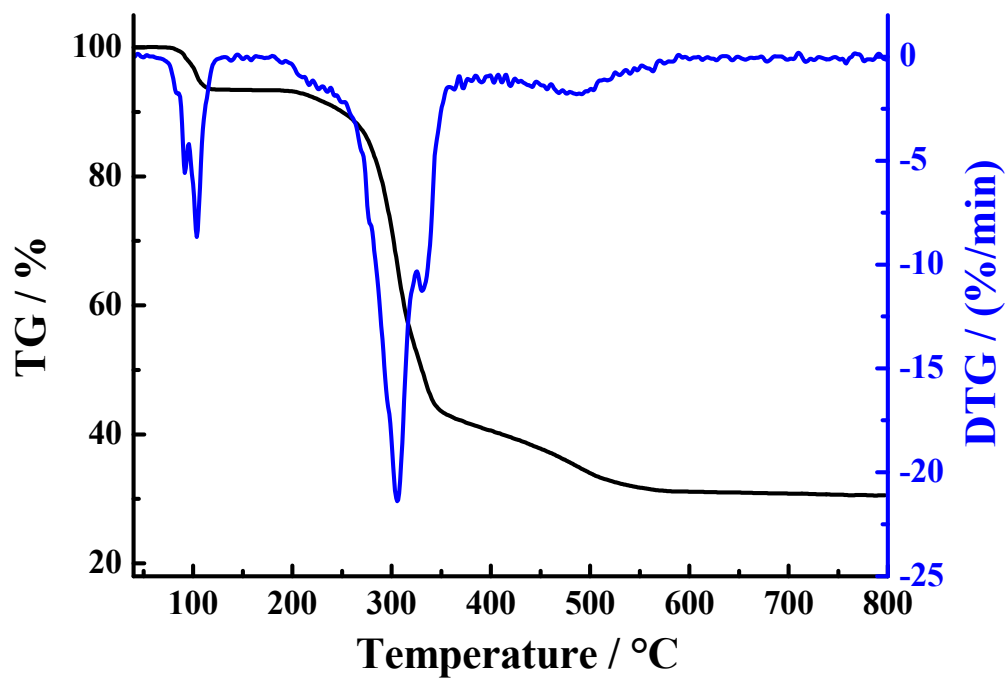

Figure S117 The TG-DTG curve of **9b**

## 5 Cell

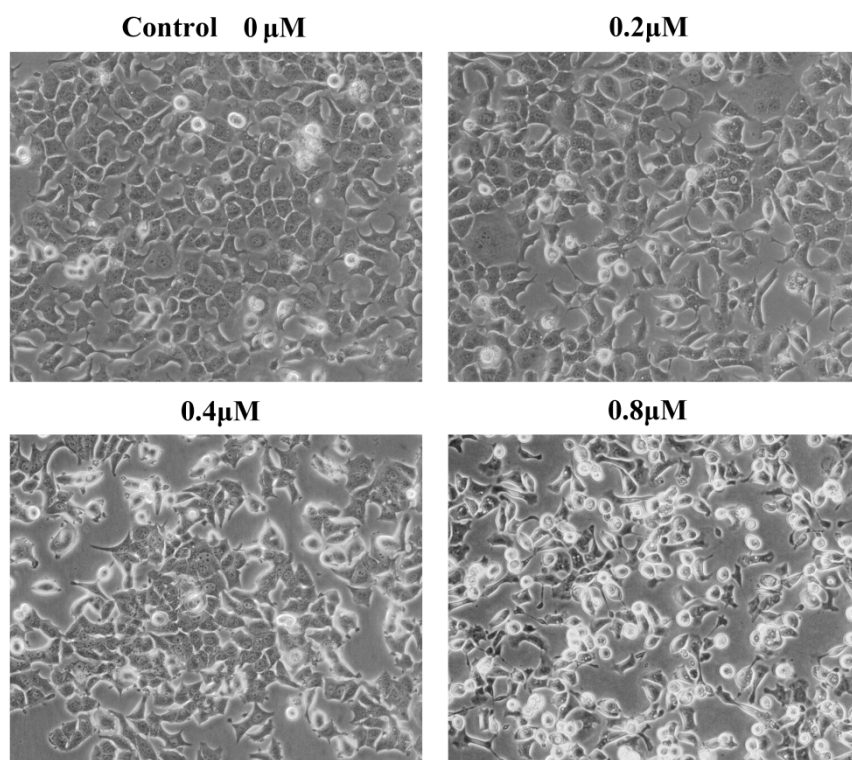

Figure S118. **4b** altered the morphology and growth status of MCF-7 cells. MCF-7 cells were observed under light microscopy after treatment with serial concentrations of at 24 hours.

## 6 Docking

Table S6 Calculated London dG scoring of the **4b** docking with DNA.

| Ligand    | London dG (kcal/mol) | Metal contact interactions residues | Distance(Å) |
|-----------|----------------------|-------------------------------------|-------------|
| <b>C5</b> | -13.8816             | DC A9                               | 2.605       |

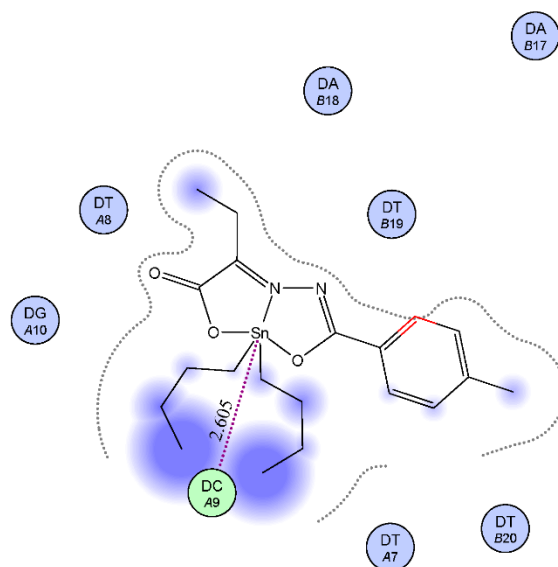

Figure S119 The 2D view of the interaction modes of **4b** and DNA.
